# Supplementary material
Source: publisher figshare collection journal article supplement (https://acs.figshare.com/ndownloader/files/9039124)
Supplement: Supplementary file 1 [file 9039124]

## Sheet: S1 ΔG
Table S1. Comparison of the experimental and calculated binding free energies (kcal/mol) for all force field combinations. For each host-guest pair, a mean and SEM value is provided. Error metrics characterizing the deviation of the calculated values from the experimental values are given below (see Table S3 for more details).
				Experiment		Q4RG-TIP3P		Q4RG-TIP4Pew		Q4RG-SPC		Q4RG-OPC		Q4RG-OPC-jc		Q4RG-OPC-phos		Q4RG-OPC-jcphos		Q4BG-TIP3P		BGRG-TIP3P		BGBG-TIP3P
	Host	Guest Name	HG ID	Avg	SEM	Avg	SEM	Avg	SEM	Avg	SEM	Avg	SEM	Avg	SEM	Avg	SEM	Avg	SEM	Avg	SEM	Avg	SEM	Avg	SEM
	aCD	1-butylamine[+1]	a-bam	-1.575	0.019	-0.79	0.18	-1.54	0.22	-0.64	0.19	-1.04	0.19	-0.81	0.22	-0.09	0.22	-1	0.25	-0.69	0.17	-0.59	0.19	-0.82	0.21
	aCD	n-methylbutylamine[+1]	a-nmb	-1.685	0.018	-1.22	0.17	-1.35	0.22	-1.24	0.22	-1.63	0.21	-0.86	0.22	-0.16	0.27	-0.51	0.22	-0.66	0.18	-0.86	0.2	-0.83	0.18
	aCD	1-methylbutylamine[+1]	a-mba	-1.764	0.02	-0.93	0.2	-1.24	0.23	-0.69	0.22	-0.34	0.21	-0.24	0.19	-0.51	0.26	-0.39	0.22	-1.26	0.2	-0.8	0.2	-0.89	0.25
	aCD	1-pentylamine[+1]	a-pam	-2.72	0.004	-2.22	0.18	-2.48	0.22	-1.69	0.21	-2.2	0.21	-2.03	0.25	-1.89	0.23	-1.72	0.22	-2.43	0.19	-1.59	0.19	-1.52	0.18
	aCD	1-hexylamine[+1]	a-ham	-3.533	0.004	-3.66	0.2	-3.42	0.19	-3.55	0.2	-3.14	0.22	-3.5	0.23	-2.7	0.28	-2.35	0.25	-3.48	0.18	-2.72	0.19	-2.65	0.18
	aCD	n-methylhexylamine[+1]	a-nmh	-3.516	0.012	-3.92	0.2	-4.11	0.23	-3.87	0.23	-3.4	0.21	-3.57	0.21	-3.17	0.28	-2.54	0.27	-4.05	0.2	-3.04	0.19	-2.91	0.18
	aCD	1-methylhexylamine[+1]	a-mha	-3.604	0.004	-3.9	0.2	-4.43	0.23	-3.97	0.22	-3.28	0.23	-3.66	0.23	-3.33	0.25	-2.61	0.21	-3.84	0.18	-2.85	0.19	-2.89	0.18
	aCD	1-heptylamine[+1]	a-hpa	-4.137	0.004	-4.25	0.18	-4.79	0.2	-4.6	0.21	-4.25	0.24	-4.2	0.22	-3.96	0.23	-3.3	0.25	-4.84	0.2	-3.4	0.19	-3.53	0.18
	aCD	1-methylheptylamine[+1]	a-mhp	-4.166	0.004	-4.9	0.19	-5.42	0.25	-4.95	0.24	-4.18	0.22	-4.37	0.26	-2.95	0.3	-3.38	0.22	-4.8	0.21	-4.03	0.21	-3.81	0.19
	aCD	1-octylamine[+1]	a-oam	-4.606	0.007	-5.61	0.2	-5.49	0.22	-5.35	0.21	-4.44	0.19	-4.78	0.22	-4.45	0.26	-4.77	0.22	-5.55	0.18	-4.39	0.19	-4.32	0.17
	bCD	1-hexylamine[+1]	b-ham	-2.486	0.084	-2.76	0.2	-2.47	0.21	-1.81	0.19	-1.59	0.21	-1.7	0.22	-1.39	0.23	-1.43	0.22	-1.87	0.17	-2.02	0.21	-1.67	0.29
	bCD	1-methylhexylamine[+1]	b-mha	-2.557	0.066	-2.49	0.19	-2.53	0.23	-2.13	0.2	-2.09	0.22	-1.64	0.22	-1.48	0.24	-1.3	0.21	-1.98	0.18	-2.58	0.37	-1.67	0.27
	bCD	1-octylamine[+1]	b-oam	-3.585	0.12	-4	0.17	-4.12	0.17	-3.97	0.2	-3.41	0.2	-3.02	0.22	-3.21	0.23	-2.97	0.19	-3.78	0.19	-2.91	0.24	-2.75	0.27
	aCD	cyclobutanol[0]	a-cbu	-2.022	0.016	-2.32	0.18	-2.47	0.22	-2.74	0.23	-2.25	0.2	-2.71	0.21	-0.97	0.24	-2.17	0.23	-2.93	0.18	-0.6	0.2	-0.88	0.22
	aCD	cyclopentanol[0]	a-cpe	-2.13	0.016	-3.16	0.23	-3.04	0.27	-3.39	0.4	-2.72	0.23	-3.02	0.21	-2.89	0.25	-2.24	0.22	-3.48	0.19	-1.1	0.24	-1.5	0.29
	aCD	cycloheptanol[0]	a-chp	-2.51	0.06	-3.09	0.21	-3.37	0.25	-3.42	0.25	-2.84	0.25	-2.68	0.25	-3.13	0.35	-2.45	0.26	-3.75	0.21	-1.32	0.25	-1.69	0.24
	aCD	cyclooctanol[0]	a-coc	-3.227	1.135	-3.34	0.22	-3.27	0.25	-3.23	0.25	-2.86	0.26	-3.09	0.28	-3.52	0.26	-2.73	0.3	-3.57	0.22	-1.97	0.25	-1.86	0.24
	bCD	cyclobutanol[0]	b-cbu	-1.554	0.167	-2.53	0.16	-2.75	0.19	-2.23	0.18	-1.98	0.18	-1.81	0.19	-1.42	0.19	-1.66	0.19	-2.5	0.17	-1.17	0.22	-1.64	0.36
	bCD	cyclopentanol[0]	b-cpe	-3.05	0.01	-4.37	0.17	-4.48	0.16	-4.13	0.18	-3.47	0.18	-3.56	0.18	-3.35	0.22	-3.39	0.19	-4.64	0.16	-2.59	0.24	-2.39	0.28
	bCD	1-methylcyclohexanol[0]	b-mch	-4.175	0.01	-6.29	0.16	-5.72	0.17	-5.41	0.2	-4.72	0.18	-5.15	0.24	-4.55	0.25	-4.72	0.25	-5.69	0.18	-2.91	0.24	-2.89	0.28
	bCD	cis-4-methylcyclohexanol[0]	b-m4c	-4.319	0.006	-5.47	0.15	-5.49	0.17	-4.89	0.19	-4.41	0.19	-4.52	0.19	-4.53	0.22	-4.04	0.19	-5.85	0.18	-2.9	0.23	-2.82	0.26
	bCD	trans-4-methylcyclohexanol[0]	b-m4t	-4.541	0.008	-5.99	0.16	-6.27	0.18	-5.84	0.2	-5.31	0.19	-5.31	0.2	-4.57	0.19	-4.89	0.18	-6.06	0.18	-3.56	0.2	-3.5	0.26
	bCD	cycloheptanol[0]	b-chp	-4.56	0.011	-6.31	0.17	-6.57	0.18	-5.92	0.2	-5.16	0.18	-4.96	0.19	-5.24	0.19	-4.91	0.19	-6.25	0.16	-3.25	0.21	-3.27	0.25
	bCD	cyclooctanol[0]	b-coc	-4.971	0.036	-6.62	0.16	-6.32	0.2	-6.21	0.19	-5.48	0.19	-5.52	0.19	-5.17	0.22	-5.26	0.25	-6.68	0.17	-3.4	0.21	-3.71	0.27
	aCD	butanoate[-1]	a-but	-1.506	0.036	-4.14	0.18	-4.08	0.23	-4.54	0.24	-2.97	0.25	-3.44	0.25	-3.26	0.26	-3.62	0.24	-4.02	0.19	-0.95	0.26	-1.08	0.2
	aCD	pentanoate[-1]	a-pnt	-2.596	0.005	-5.04	0.18	-4.77	0.22	-4.81	0.22	-4.18	0.23	-3.89	0.22	-3.89	0.27	-3.54	0.23	-5.12	0.19	-1.58	0.2	-1.74	0.19
	aCD	hexanoate[-1]	a-hex	-3.38	0.005	-5.88	0.18	-5.74	0.21	-6.06	0.22	-4.57	0.22	-4.89	0.21	-4.11	0.2	-5.34	0.25	-6.17	0.19	-2.84	0.19	-2.92	0.21
	aCD	trans-2-hexenoate[-1]	a-hx2	-3.344	0.01	-5.72	0.18	-5.74	0.22	-5.46	0.2	-4.96	0.25	-4.56	0.21	-4.73	0.23	-4.25	0.23	-5.6	0.18	-2.64	0.21	-2.6	0.19
	aCD	trans-3-hexenoate[-1]	a-hx3	-3.011	0.01	-5.35	0.18	-4.53	0.21	-4.69	0.22	-3.57	0.21	-4.14	0.2	-4.16	0.23	-4.4	0.22	-5.68	0.2	-1.72	0.19	-1.69	0.2
	aCD	heptanoate[-1]	a-hep	-3.991	0.013	-6.85	0.2	-6.83	0.21	-6.61	0.23	-5.47	0.21	-5.2	0.19	-5.36	0.26	-5.39	0.28	-7.18	0.2	-3.62	0.2	-3.92	0.2
	aCD	6-heptenoate[-1]	a-hp6	-3.597	0.004	-5.91	0.18	-5.62	0.22	-5.9	0.23	-4.18	0.2	-4.49	0.22	-4.33	0.29	-4.3	0.22	-6.53	0.19	-3.03	0.2	-3.36	0.18
	aCD	octanoate[-1]	a-oct	-4.622	0.017	-7.53	0.19	-7.43	0.21	-7.6	0.25	-5.95	0.22	-6.26	0.22	-6.17	0.27	-5.88	0.25	-7.49	0.19	-4.56	0.2	-4.84	0.24
	bCD	pentanoate[-1]	b-pnt	-1.267	0.323	-3.57	0.18	-3.15	0.21	-3.04	0.22	-2.08	0.22	-2.32	0.23	-1.43	0.23	-1.96	0.25	-3.28	0.2	-1.65	0.23	-1.72	0.3
	bCD	hexanoate[-1]	b-hex	-2.28	0.03	-4.27	0.17	-4.06	0.21	-3.94	0.23	-3.19	0.23	-3.05	0.19	-3.2	0.24	-2.95	0.22	-4.22	0.18	-2.8	0.27	-2.47	0.27
	bCD	heptanoate[-1]	b-hep	-3.394	0.179	-5.27	0.2	-4.98	0.22	-4.83	0.22	-4.11	0.22	-3.97	0.25	-3.44	0.21	-3.71	0.21	-5.27	0.2	-3.16	0.24	-3.4	0.32
	bCD	benzoate[-1]	b-ben	-1.64	0.024	-3.84	0.19	-3.52	0.23	-4.04	0.23	-3.01	0.22	-3.09	0.23	-2.76	0.26	-2.56	0.21	-2.84	0.17	-1.83	0.22	-1.83	0.31
	bCD	phenylacetate[-1]	b-pha	-1.697	0.048	-4.14	0.2	-4.04	0.22	-3.69	0.23	-3.14	0.22	-3.29	0.22	-2.76	0.23	-3.04	0.22	-3.81	0.21	-2.44	0.29	-2.32	0.34
	bCD	3-methylphenylacetate[-1]	b-mp3	-1.458	0.036	-4.59	0.2	-4.4	0.22	-4.55	0.28	-3.31	0.22	-3.44	0.24	-2.92	0.24	-3.07	0.24	-3.72	0.21	-3.06	0.28	-2.2	0.31
	bCD	4-methylphenylacetate[-1]	b-mp4	-2.192	0.013	-4.66	0.17	-4.71	0.23	-4.64	0.22	-3.96	0.21	-3.36	0.21	-3.49	0.22	-3.61	0.21	-4.06	0.2	-2.96	0.23	-2.78	0.34
	bCD	3-methoxyphenylacetate[-1]	b-mo3	-2.156	0.01	-4.7	0.19	-4.42	0.24	-4.43	0.25	-3.67	0.21	-3.69	0.25	-3.63	0.27	-4.09	0.25	-5	0.26	-2.89	0.27	-2.82	0.38
	bCD	4-methoxyphenylacetate[-1]	b-mo4	-2.512	0.007	-5.56	0.2	-5.21	0.22	-5.19	0.22	-3.8	0.21	-4.13	0.21	-3.78	0.23	-3.41	0.18	-4.79	0.2	-3.6	0.23	-3.1	0.31
	bCD	3-phenylbutanoate[-1]	b-pb3	-3.518	0.007	-5.55	0.22	-4.78	0.27	-4.61	0.22	-3.85	0.25	-3.54	0.26	-3.78	0.31	-3.5	0.28	-4.62	0.19	-2.6	0.22	-2.82	0.31
	bCD	4-phenylbutanoate[-1]	b-pb4	-3.599	0.018	-5.55	0.19	-5.82	0.23	-5.51	0.2	-4.78	0.23	-4.24	0.21	-4.13	0.21	-3.97	0.19	-4.81	0.21	-3.69	0.26	-3.34	0.35
			Slope			1.02	0.18	1.03	0.16	0.98	0.18	0.9	0.12	0.93	0.14	0.97	0.15	0.86	0.14	1.12	0.17	0.71	0.12	0.74	0.1
			Intercept			-1.31	0.61	-1.25	0.53	-1.24	0.63	-0.82	0.43	-0.74	0.49	-0.35	0.52	-0.67	0.49	-0.96	0.57	-0.4	0.4	-0.29	0.33
			R2			0.47	0.09	0.54	0.09	0.44	0.09	0.57	0.08	0.56	0.08	0.53	0.08	0.46	0.1	0.52	0.08	0.52	0.11	0.6	0.09
			Kendall's τ			0.48	0.07	0.52	0.07	0.46	0.08	0.55	0.06	0.55	0.07	0.53	0.07	0.46	0.08	0.51	0.07	0.53	0.08	0.57	0.06
			RMSE			1.8	0.13	1.69	0.12	1.67	0.13	0.97	0.09	1.03	0.09	1	0.08	1.03	0.09	1.73	0.13	0.92	0.08	0.85	0.08
			MSE			-1.38	0.18	-1.36	0.15	-1.19	0.18	-0.52	0.13	-0.53	0.14	-0.26	0.15	-0.25	0.15	-1.3	0.18	0.48	0.12	0.5	0.11
			MUE			1.53	0.15	1.45	0.13	1.43	0.13	0.8	0.09	0.87	0.09	0.85	0.08	0.87	0.09	1.51	0.13	0.79	0.07	0.73	0.07

## Sheet: S2 ΔH
Table S2. Comparison of the experimental and calculated binding enthalpies (kcal/mol) for all force field combinations. For each host-guest pair, a mean and SEM value is provided. Error metrics characterizing the deviation of the calculated values from the experimental values are given below (see Table S3 for more details).
				Experiment		Q4RG-TIP3P		Q4RG-TIP4Pew		Q4RG-SPC		Q4RG-OPC		Q4RG-OPC-jc		Q4RG-OPC-phos		Q4RG-OPC-jcphos		Q4BG-TIP3P		BGRG-TIP3P		BGBG-TIP3P
	Host	Guest Name	HG ID	Avg	SEM	Avg	SEM	Avg	SEM	Avg	SEM	Avg	SEM	Avg	SEM	Avg	SEM	Avg	SEM	Avg	SEM	Avg	SEM	Avg	SEM
	aCD	1-butylamine[+1]	a-bam	-2.17	0.05	-1.84	0.38	-1.71	0.28	-0.75	0.3	-0.35	0.34	-0.48	0.32	2.33	0.43	1.22	0.48	-1.78	0.22	0.32	0.28	-0.84	0.68
	aCD	n-methylbutylamine[+1]	a-nmb	-2.57	0.06	-2.9	0.31	-1.99	0.3	-2.2	0.28	-1.23	0.32	-1.41	0.32	0.73	0.73	1.15	0.5	-2.66	0.31	-0.1	0.29	0.03	0.26
	aCD	1-methylbutylamine[+1]	a-mba	-2.68	0.07	-2.22	0.3	-2.26	0.26	-1.14	0.3	0.02	0.33	0.24	0.38	1.57	0.46	1.46	0.49	-2.31	0.28	0.45	0.55	-0.32	0.44
	aCD	1-pentylamine[+1]	a-pam	-3.28	0.02	-3.68	0.32	-3.1	0.33	-2.16	0.35	-1.87	0.35	-1.77	0.28	0.68	0.48	0.13	0.47	-3.89	0.26	-0.91	0.28	-0.84	0.36
	aCD	1-hexylamine[+1]	a-ham	-4.19	0.02	-5.38	0.29	-3.77	0.49	-3.66	0.35	-2.39	0.32	-2.4	0.32	-0.89	0.51	0.45	0.51	-4.97	0.31	-1.45	0.24	-2.33	0.34
	aCD	n-methylhexylamine[+1]	a-nmh	-4.2	0.08	-5.78	0.33	-4.04	0.27	-4.31	0.31	-1.93	0.35	-2.37	0.35	-0.68	0.49	-0.24	0.61	-5.47	0.3	-2.91	0.36	-2.54	0.23
	aCD	1-methylhexylamine[+1]	a-mha	-4.28	0.02	-6.36	0.29	-4.98	0.25	-4.57	0.42	-2.81	0.32	-2.92	0.28	0.05	0.52	0.04	0.66	-5.75	0.35	-2.65	0.39	-2.16	0.23
	aCD	1-heptylamine[+1]	a-hpa	-4.66	0.02	-5.58	0.32	-4.4	0.38	-4.41	0.36	-2.36	0.29	-1.92	0.34	-0.03	0.6	0.01	0.56	-5.99	0.25	-2.39	0.26	-2.65	0.42
	aCD	1-methylheptylamine[+1]	a-mhp	-4.74	0.02	-6.73	0.34	-5.43	0.31	-5.49	0.37	-2.73	0.46	-3.11	0.28	0.87	0.55	-0.49	1.06	-6.27	0.27	-2.95	0.23	-3.41	0.28
	aCD	1-octylamine[+1]	a-oam	-5.46	0.03	-6.79	0.29	-4.65	0.27	-4.85	0.31	-1.66	0.35	-2.37	0.26	-0.6	0.41	0.32	0.58	-6.69	0.3	-3.15	0.33	-3.73	0.38
	bCD	1-hexylamine[+1]	b-ham	0.6	0.05	-0.88	0.25	0.58	0.32	1.7	0.35	3.2	0.41	2.62	0.35	2.95	0.39	3.06	0.27	-0.35	0.28	1.58	1.12	2.29	0.99
	bCD	1-methylhexylamine[+1]	b-mha	0.47	0.03	-0.36	0.3	0.75	0.45	0.8	0.41	2.59	0.38	2.8	0.29	3.4	0.58	3.12	0.31	-0.79	0.33	2.89	0.56	2.48	0.68
	bCD	1-octylamine[+1]	b-oam	-0.48	0.03	-1.33	0.29	0.41	0.4	0.02	0.34	2.83	0.31	2.82	0.39	3.44	0.31	3.66	0.33	-1.53	0.24	3.12	0.42	2.66	0.57
	aCD	cyclobutanol[0]	a-cbu	-2.75	0.05	-3.21	0.24	-1.23	0.3	-1.96	0.28	-0.13	0.22	-0.09	0.23	0.91	0.29	1.26	0.41	-3.85	0.22	-0.38	0.25	-0.71	0.62
	aCD	cyclopentanol[0]	a-cpe	-2.74	0.02	-3.94	0.26	-1.68	0.23	-2.44	0.22	-0.51	0.35	-0.57	0.2	1.08	0.39	1.85	0.37	-4.62	0.29	-1.03	0.32	-1.06	0.59
	aCD	cycloheptanol[0]	a-chp	-2.99	0.23	-4.96	0.27	-3.41	0.23	-3.54	0.32	-0.75	0.3	-1.23	0.28	1.19	0.6	1.22	0.53	-5.28	0.27	-2.73	0.26	-2.33	0.27
	aCD	cyclooctanol[0]	a-coc	-0.93	0.32	-5.3	0.24	-2.91	0.37	-3.59	0.32	-0.49	0.31	-0.98	0.26	1.34	0.32	1.22	0.52	-5.62	0.27	-2.61	0.25	-2.93	0.3
	bCD	cyclobutanol[0]	b-cbu	0.88	0.17	-0.37	0.24	1.03	0.26	1.04	0.26	2.38	0.26	2.16	0.27	2.53	0.28	3	0.24	-0.76	0.23	2.1	0.68	-0.2	0.53
	bCD	cyclopentanol[0]	b-cpe	-1.09	0.01	-2.78	0.27	-0.64	0.25	-0.54	0.24	1.66	0.26	1.06	0.3	1.78	0.32	2.07	0.29	-2.71	0.23	0.09	1.06	3.63	0.68
	bCD	1-methylcyclohexanol[0]	b-mch	-2.29	0.03	-3.53	0.27	-1.67	0.24	-2.01	0.33	1.65	0.24	0.89	0.33	1.84	0.31	1.6	0.44	-3.82	0.34	2.9	0.67	2.27	0.92
	bCD	cis-4-methylcyclohexanol[0]	b-m4c	-2.27	0.01	-3.93	0.26	-1.14	0.32	-1.16	0.31	1.58	0.24	1.73	0.22	2.02	0.32	1.79	0.29	-3.82	0.24	3.33	0.43	2.62	0.68
	bCD	trans-4-methylcyclohexanol[0]	b-m4t	-2.17	0.02	-3.68	0.21	-1.4	0.28	-1.87	0.35	1.26	0.25	1.27	0.28	1.87	0.24	1.7	0.26	-4.71	0.27	3.83	0.37	2.48	0.62
	bCD	cycloheptanol[0]	b-chp	-2.96	0.01	-4.51	0.29	-2.16	0.29	-2.38	0.25	0.31	0.27	0.58	0.23	1.03	0.23	1.14	0.23	-5.3	0.26	2.97	0.43	1.82	0.69
	bCD	cyclooctanol[0]	b-coc	-3.92	0.06	-5.24	0.19	-2.68	0.34	-3.19	0.29	0.46	0.26	-0.27	0.25	-0.06	0.31	1.06	0.26	-5.67	0.24	3.24	0.28	0.44	1.07
	aCD	butanoate[-1]	a-but	-2.53	0.12	-5.28	0.23	-3.13	0.28	-4.23	0.29	-1.05	0.21	-0.9	0.29	0.34	0.34	0.74	0.41	-4.93	0.26	-2.31	0.52	-1.08	0.41
	aCD	pentanoate[-1]	a-pnt	-2.75	0.01	-5.82	0.27	-3.83	0.28	-4.22	0.26	-0.62	0.24	-0.61	0.26	0.4	0.54	1.23	0.46	-5.69	0.34	-1.67	0.21	-1.62	0.31
	aCD	hexanoate[-1]	a-hex	-3.4	0.02	-6.83	0.28	-4.2	0.26	-5.47	0.31	-1.31	0.26	-1.94	0.21	-0.37	0.32	0.44	0.41	-6.71	0.25	-3.05	0.32	-2.95	0.37
	aCD	trans-2-hexenoate[-1]	a-hx2	-4.12	0.06	-6.61	0.32	-4.27	0.24	-5.34	0.24	-1.53	0.21	-2.12	0.24	0.1	0.53	0.09	0.47	-6.13	0.29	-1.57	0.41	-2.35	0.34
	aCD	trans-3-hexenoate[-1]	a-hx3	-3.36	0.05	-6.31	0.22	-4.1	0.26	-4.43	0.22	-1.57	0.26	-1.78	0.23	0.06	0.44	0.63	0.35	-6.29	0.3	-1.78	0.25	-2.8	0.31
	aCD	heptanoate[-1]	a-hep	-4.19	0.09	-7.29	0.27	-5.15	0.24	-6.32	0.25	-1.77	0.25	-1.9	0.23	-0.21	0.35	0.05	0.53	-7.53	0.22	-3.63	0.22	-4.05	0.44
	aCD	6-heptenoate[-1]	a-hp6	-4.48	0.02	-7.01	0.36	-4.25	0.23	-5.62	0.24	-2.15	0.24	-2.27	0.24	0.08	0.43	-0.49	0.5	-7.42	0.28	-3.23	0.23	-3.73	0.21
	aCD	octanoate[-1]	a-oct	-4.89	0.03	-8.32	0.22	-5.69	0.25	-6.67	0.38	-2.06	0.24	-2.26	0.24	-0.04	0.39	0.18	0.35	-8.74	0.25	-4.51	0.31	-4.69	0.29
	bCD	pentanoate[-1]	b-pnt	1.89	0.53	-1.28	0.27	0.72	0.28	0.29	0.34	3.61	0.32	3.31	0.29	4	0.32	4.2	0.3	-1.19	0.31	0.94	0.75	-0.51	0.87
	bCD	hexanoate[-1]	b-hex	1.31	0.04	-2.23	0.28	0.8	0.41	-0.52	0.27	3.57	0.29	3.19	0.33	4.42	0.27	4.08	0.35	-1.83	0.25	-0.22	0.83	1.3	0.67
	bCD	heptanoate[-1]	b-hep	0.42	0.04	-2.28	0.35	0.12	0.38	-1.71	0.34	3.49	0.26	3.36	0.31	4.29	0.26	4.07	0.27	-2.57	0.32	0.38	0.64	1.91	0.32
	bCD	benzoate[-1]	b-ben	-2.51	0.08	-2.73	0.26	-1.36	0.29	-2.59	0.39	0.48	0.43	0.19	0.39	0.82	0.38	0.56	0.36	-2.78	0.25	0.72	0.56	-0.76	0.8
	bCD	phenylacetate[-1]	b-pha	-1.79	0.11	-3.62	0.33	-0.93	0.31	-2.21	0.33	1.23	0.27	0.75	0.26	1.69	0.28	1.87	0.29	-2.85	0.23	-0.68	0.86	-1.35	0.93
	bCD	3-methylphenylacetate[-1]	b-mp3	-2.75	0.13	-3.47	0.27	-1.48	0.4	-2.78	0.34	1.25	0.31	0.95	0.34	1.99	0.28	1.9	0.36	-2.88	0.4	-0.12	0.4	0.68	0.46
	bCD	4-methylphenylacetate[-1]	b-mp4	-2.89	0.05	-3.14	0.29	-1.28	0.35	-1.98	0.25	2.35	0.39	0.96	0.3	2.17	0.28	2.29	0.41	-2.67	0.29	-0.49	0.42	0.78	0.63
	bCD	3-methoxyphenylacetate[-1]	b-mo3	-2.93	0.03	-4.62	0.3	-2.52	0.39	-3.39	0.28	-0.19	0.26	-0.55	0.32	0.63	0.48	0.43	0.27	-3.98	0.26	-1.45	0.68	-0.59	0.5
	bCD	4-methoxyphenylacetate[-1]	b-mo4	-1.96	0.01	-3.92	0.28	-2.45	0.29	-3.46	0.39	0.52	0.35	0.12	0.3	1.36	0.46	0.29	0.35	-3.34	0.3	-2.4	0.74	-0.91	0.36
	bCD	3-phenylbutanoate[-1]	b-pb3	-2.25	0.01	-3.99	0.25	-0.9	0.32	-2.12	0.31	2.21	0.31	1.64	0.23	2.75	0.3	2.54	0.29	-3.12	0.31	-0.37	0.83	1.78	0.33
	bCD	4-phenylbutanoate[-1]	b-pb4	-2.82	0.01	-3.5	0.28	-1.58	0.35	-2.25	0.28	1.39	0.29	0.84	0.31	1.58	0.27	1.86	0.28	-2.59	0.21	0.59	0.59	-1.44	0.88
			Slope			0.95	0.11	0.95	0.08	0.96	0.12	0.93	0.08	0.93	0.08	0.68	0.07	0.64	0.06	0.94	0.11	0.7	0.16	0.8	0.18
			Intercept			-1.8	0.34	0.1	0.26	-0.35	0.36	2.48	0.25	2.22	0.25	2.99	0.21	2.95	0.19	-1.78	0.34	1.26	0.53	1.36	0.61
			R2			0.68	0.08	0.77	0.06	0.68	0.07	0.71	0.08	0.75	0.07	0.71	0.07	0.7	0.08	0.64	0.08	0.3	0.11	0.39	0.12
			Kendall's τ			0.62	0.06	0.69	0.06	0.62	0.06	0.64	0.07	0.65	0.06	0.61	0.06	0.58	0.08	0.62	0.07	0.44	0.09	0.49	0.08
			RMSE			2.03	0.17	0.92	0.09	1.17	0.12	2.83	0.16	2.55	0.14	3.89	0.14	3.97	0.14	2.04	0.18	2.78	0.31	2.55	0.24
			MSE			-1.69	0.17	0.21	0.14	-0.25	0.18	2.64	0.16	2.38	0.14	3.77	0.14	3.85	0.15	-1.65	0.19	1.99	0.3	1.84	0.27
			MUE			1.73	0.16	0.77	0.08	0.95	0.11	2.64	0.16	2.38	0.14	3.77	0.14	3.85	0.15	1.72	0.17	2.25	0.26	2.13	0.22

## Sheet: S3 Metrics
	Table S3. Error statistics between the computed and experimental binding free energy (left) and binding enthalpy (right) for each force field combination. Error statistics are provided for a variety of sub-groupings of the full host-guest data set, including: ammonium guests, alcohol guests, carboxylate guests, αCD hosts, βCD hosts, n-alkyl guests, aliphatic carboxylates, and aromatic carboxylate…
	BINDING FREE ENERGY																						BINDING ENTHALPY
	Metrics	Q4RG-TIP3P		Q4RG-TIP4Pew		Q4RG-SPC		Q4RG-OPC		Q4RG-OPC-jc		Q4RG-OPC-phos		Q4RG-OPC-jcphos		Q4BG-TIP3P		BGRG-TIP3P		BGBG-TIP3P				Q4RG-TIP3P		Q4RG-TIP4Pew		Q4RG-SPC		Q4RG-OPC		Q4RG-OPC-jc		Q4RG-OPC-phos		Q4RG-OPC-jcphos		Q4BG-TIP3P		BGRG-TIP3P		BGBG-TIP3P
	All Host-Guests																						All Host-Guests
	Slope	1.02	0.18	1.03	0.16	0.98	0.18	0.9	0.12	0.93	0.14	0.97	0.15	0.86	0.14	1.12	0.17	0.71	0.12	0.74	0.1		Slope	0.95	0.11	0.95	0.08	0.96	0.12	0.93	0.08	0.93	0.08	0.68	0.07	0.64	0.06	0.94	0.11	0.7	0.16	0.8	0.18
	Intercept	-1.31	0.61	-1.25	0.53	-1.24	0.63	-0.82	0.43	-0.74	0.49	-0.35	0.52	-0.67	0.49	-0.96	0.57	-0.4	0.4	-0.29	0.33		Intercept	-1.8	0.34	0.1	0.26	-0.35	0.36	2.48	0.25	2.22	0.25	2.99	0.21	2.95	0.19	-1.78	0.34	1.26	0.53	1.36	0.61
	R2	0.47	0.09	0.54	0.09	0.44	0.09	0.57	0.08	0.56	0.08	0.53	0.08	0.46	0.1	0.52	0.08	0.52	0.11	0.6	0.09		R2	0.68	0.08	0.77	0.06	0.68	0.07	0.71	0.08	0.75	0.07	0.71	0.07	0.7	0.08	0.64	0.08	0.3	0.11	0.39	0.12
	Kendall's τ	0.48	0.07	0.52	0.07	0.46	0.08	0.55	0.06	0.55	0.07	0.53	0.07	0.46	0.08	0.51	0.07	0.53	0.08	0.57	0.06		Kendall's τ	0.62	0.06	0.69	0.06	0.62	0.06	0.64	0.07	0.65	0.06	0.61	0.06	0.58	0.08	0.62	0.07	0.44	0.09	0.49	0.08
	RMSE	1.8	0.13	1.69	0.12	1.67	0.13	0.97	0.09	1.03	0.09	1	0.08	1.03	0.09	1.73	0.13	0.92	0.08	0.85	0.08		RMSE	2.03	0.17	0.92	0.09	1.17	0.12	2.83	0.16	2.55	0.14	3.89	0.14	3.97	0.14	2.04	0.18	2.78	0.31	2.55	0.24
	MSE	-1.38	0.18	-1.36	0.15	-1.19	0.18	-0.52	0.13	-0.53	0.14	-0.26	0.15	-0.25	0.15	-1.3	0.18	0.48	0.12	0.5	0.11		MSE	-1.69	0.17	0.21	0.14	-0.25	0.18	2.64	0.16	2.38	0.14	3.77	0.14	3.85	0.15	-1.65	0.19	1.99	0.3	1.84	0.27
	MUE	1.53	0.15	1.45	0.13	1.43	0.13	0.8	0.09	0.87	0.09	0.85	0.08	0.87	0.09	1.51	0.13	0.79	0.07	0.73	0.07		MUE	1.73	0.16	0.77	0.08	0.95	0.11	2.64	0.16	2.38	0.14	3.77	0.14	3.85	0.15	1.72	0.17	2.25	0.26	2.13	0.22
	Ammonium Guests																						Ammonium Guests
	Slope	1.48	0.1	1.47	0.11	1.61	0.11	1.26	0.14	1.47	0.11	1.39	0.12	1.21	0.15	1.61	0.08	1.15	0.1	1.15	0.09		Slope	1.14	0.15	1.06	0.1	1.15	0.12	1.02	0.15	1.04	0.13	0.71	0.12	0.65	0.12	1.1	0.14	1.06	0.17	1.09	0.13
	Intercept	1.43	0.32	1.17	0.35	2.01	0.38	1.17	0.5	1.89	0.38	2.01	0.35	1.55	0.48	1.94	0.27	1.08	0.36	1.22	0.3		Intercept	-0.47	0.59	0.42	0.32	0.96	0.42	2.25	0.5	2.21	0.46	3.12	0.42	2.93	0.4	-0.5	0.55	2.48	0.68	2.29	0.54
	R2	0.95	0.03	0.94	0.03	0.95	0.03	0.92	0.04	0.95	0.03	0.92	0.06	0.9	0.04	0.97	0.02	0.89	0.07	0.94	0.03		R2	0.89	0.05	0.93	0.04	0.91	0.04	0.85	0.1	0.87	0.08	0.74	0.12	0.74	0.14	0.9	0.04	0.87	0.09	0.91	0.06
	Kendall's τ	0.76	0.1	0.77	0.09	0.78	0.09	0.74	0.09	0.76	0.1	0.74	0.12	0.76	0.1	0.81	0.09	0.74	0.11	0.77	0.09		Kendall's τ	0.78	0.09	0.77	0.09	0.8	0.09	0.62	0.15	0.65	0.12	0.55	0.16	0.55	0.14	0.85	0.07	0.72	0.11	0.74	0.1
	RMSE	0.57	0.09	0.62	0.11	0.69	0.09	0.58	0.14	0.7	0.13	0.97	0.13	1	0.1	0.65	0.09	0.74	0.09	0.8	0.08		RMSE	1.24	0.18	0.61	0.1	0.88	0.15	2.35	0.23	2.22	0.21	4.07	0.27	4.08	0.29	1.08	0.13	2.41	0.21	2.13	0.19
	MSE	-0.06	0.16	-0.27	0.16	0.11	0.19	0.38	0.13	0.43	0.16	0.82	0.15	0.9	0.12	0.05	0.18	0.63	0.11	0.74	0.09		MSE	-0.94	0.23	0.24	0.16	0.51	0.2	2.23	0.22	2.11	0.21	3.96	0.27	3.96	0.28	-0.83	0.19	2.27	0.23	2.02	0.2
	MUE	0.48	0.09	0.51	0.1	0.61	0.1	0.44	0.11	0.56	0.12	0.84	0.14	0.93	0.11	0.57	0.09	0.66	0.1	0.75	0.09		MUE	1.07	0.18	0.52	0.1	0.73	0.14	2.23	0.22	2.11	0.21	3.96	0.27	3.96	0.28	0.96	0.14	2.29	0.22	2.03	0.19
	Alcohol Guests																						Alcohol Guests
	Slope	1.24	0.2	1.18	0.19	1.04	0.17	0.97	0.15	0.95	0.15	1.03	0.2	0.99	0.15	1.11	0.16	0.78	0.14	0.67	0.15		Slope	0.68	0.4	0.59	0.33	0.68	0.39	0.45	0.33	0.42	0.34	0.44	0.21	0.32	0.17	0.77	0.38	-0.24	0.82	0.12	0.83
	Intercept	-0.32	0.63	-0.56	0.62	-0.82	0.54	-0.46	0.47	-0.64	0.5	-0.12	0.79	-0.17	0.48	-0.93	0.52	0.36	0.53	-0.1	0.53		Intercept	-2.36	1.07	-0.4	0.9	-0.56	1.06	1.62	0.88	1.31	0.93	2.37	0.53	2.29	0.45	-2.59	1.05	0.52	2.07	0.91	2.23
	R2	0.84	0.16	0.84	0.17	0.83	0.17	0.85	0.16	0.84	0.15	0.81	0.12	0.85	0.15	0.86	0.17	0.8	0.13	0.76	0.16		R2	0.52	0.31	0.47	0.29	0.5	0.31	0.32	0.22	0.3	0.22	0.49	0.21	0.45	0.27	0.54	0.3	0.09	0.13	0.1	0.14
	Kendall's τ	0.7	0.13	0.71	0.13	0.74	0.13	0.74	0.13	0.67	0.14	0.72	0.12	0.73	0.13	0.79	0.12	0.67	0.13	0.67	0.14		Kendall's τ	0.41	0.26	0.44	0.24	0.44	0.24	0.33	0.23	0.34	0.23	0.5	0.2	0.41	0.22	0.42	0.26	-0.01	0.24	0.13	0.24
	RMSE	1.32	0.16	1.33	0.15	1.1	0.12	0.6	0.16	0.69	0.15	0.65	0.17	0.48	0.19	1.41	0.11	1.24	0.16	1.16	0.18		RMSE	1.88	0.4	1.08	0.19	0.99	0.31	3	0.3	2.78	0.29	3.63	0.24	3.85	0.26	2.27	0.37	4.19	0.66	3.64	0.47
	MSE	-1.13	0.21	-1.15	0.2	-0.94	0.17	-0.38	0.15	-0.48	0.16	-0.21	0.19	-0.13	0.15	-1.3	0.17	1.12	0.17	0.99	0.19		MSE	-1.66	0.29	0.48	0.3	0.14	0.31	2.78	0.35	2.52	0.36	3.52	0.27	3.74	0.29	-2.09	0.29	3.17	0.85	2.66	0.76
	MUE	1.2	0.17	1.23	0.15	1.03	0.12	0.51	0.11	0.59	0.12	0.51	0.13	0.37	0.11	1.36	0.12	1.13	0.16	1.04	0.16		MUE	1.66	0.29	0.94	0.17	0.76	0.21	2.79	0.34	2.56	0.34	3.52	0.27	3.74	0.29	2.09	0.29	3.5	0.72	3.22	0.53
	Carboxylate Guests																						Carboxylate Guests
	Slope	0.95	0.12	0.97	0.15	0.92	0.18	0.84	0.12	0.77	0.15	0.9	0.16	0.81	0.16	1.14	0.16	0.56	0.18	0.71	0.15		Slope	0.96	0.19	0.97	0.16	0.94	0.16	0.96	0.13	0.97	0.13	0.76	0.1	0.71	0.09	1.01	0.27	0.62	0.2	0.79	0.3
	Intercept	-2.56	0.32	-2.29	0.39	-2.44	0.47	-1.63	0.34	-1.83	0.39	-1.29	0.45	-1.61	0.43	-1.86	0.41	-1.18	0.54	-0.73	0.43		Intercept	-2.26	0.6	-0.01	0.5	-1.1	0.49	2.78	0.44	2.42	0.41	3.22	0.32	3.13	0.3	-1.85	0.82	0.23	0.62	0.82	0.93
	R2	0.83	0.07	0.76	0.1	0.69	0.13	0.74	0.1	0.69	0.13	0.72	0.11	0.62	0.14	0.75	0.11	0.39	0.17	0.56	0.16		R2	0.69	0.1	0.74	0.09	0.74	0.1	0.73	0.11	0.8	0.08	0.74	0.12	0.72	0.14	0.62	0.1	0.43	0.15	0.47	0.17
	Kendall's τ	0.69	0.09	0.66	0.1	0.6	0.12	0.65	0.1	0.59	0.11	0.63	0.11	0.55	0.12	0.65	0.11	0.42	0.15	0.55	0.13		Kendall's τ	0.66	0.11	0.68	0.1	0.66	0.12	0.64	0.12	0.66	0.1	0.56	0.11	0.53	0.14	0.64	0.12	0.48	0.14	0.53	0.13
	RMSE	2.47	0.09	2.27	0.11	2.3	0.13	1.3	0.1	1.33	0.11	1.16	0.1	1.25	0.13	2.32	0.13	0.8	0.11	0.64	0.09		RMSE	2.48	0.21	0.97	0.12	1.39	0.15	3	0.26	2.61	0.2	3.89	0.2	3.94	0.2	2.37	0.24	1.81	0.25	1.96	0.31
	MSE	-2.44	0.09	-2.21	0.12	-2.23	0.14	-1.21	0.11	-1.22	0.12	-1.03	0.13	-1.1	0.14	-2.23	0.15	0.01	0.18	0.04	0.15		MSE	-2.22	0.26	0.03	0.22	-1	0.23	2.83	0.23	2.47	0.19	3.79	0.21	3.84	0.21	-1.96	0.31	1.11	0.33	1.24	0.35
	MUE	2.44	0.09	2.21	0.12	2.23	0.14	1.21	0.11	1.23	0.12	1.05	0.12	1.11	0.14	2.23	0.15	0.68	0.1	0.54	0.08		MUE	2.23	0.25	0.84	0.11	1.21	0.16	2.83	0.23	2.47	0.19	3.79	0.21	3.84	0.21	2.03	0.29	1.49	0.24	1.57	0.28
	αCD Hosts																						αCD Hosts
	Slope	1.37	0.31	1.33	0.28	1.34	0.33	1.08	0.22	1.17	0.26	1.18	0.29	1.04	0.27	1.38	0.32	1.18	0.14	1.14	0.14		Slope	1.1	0.36	0.93	0.23	1.03	0.33	0.63	0.15	0.68	0.17	0.52	0.16	0.5	0.16	1.04	0.38	0.74	0.31	0.81	0.33
	Intercept	0.1	1	-0.08	0.88	0.03	1.09	-0.08	0.72	0.09	0.86	0.44	0.98	0.03	0.88	-0.02	1.03	1.34	0.43	1.11	0.42		Intercept	-1.47	1.44	-0.36	0.91	-0.35	1.27	0.81	0.55	0.79	0.64	2.22	0.58	2.32	0.57	-1.73	1.49	0.62	1.23	0.65	1.26
	R2	0.54	0.14	0.6	0.14	0.51	0.15	0.6	0.12	0.61	0.13	0.53	0.15	0.45	0.15	0.52	0.13	0.87	0.1	0.85	0.11		R2	0.44	0.15	0.58	0.11	0.43	0.13	0.57	0.11	0.57	0.1	0.37	0.14	0.39	0.14	0.4	0.15	0.34	0.18	0.42	0.2
	Kendall's τ	0.51	0.12	0.54	0.11	0.5	0.12	0.53	0.11	0.54	0.1	0.47	0.13	0.45	0.12	0.5	0.12	0.77	0.07	0.76	0.07		Kendall's τ	0.53	0.09	0.6	0.08	0.5	0.09	0.55	0.09	0.57	0.08	0.4	0.13	0.44	0.11	0.51	0.1	0.46	0.12	0.51	0.12
	RMSE	1.63	0.2	1.54	0.2	1.64	0.2	0.92	0.13	1.02	0.12	1.11	0.11	1.12	0.12	1.78	0.21	0.91	0.12	0.84	0.13		RMSE	2.26	0.24	0.86	0.13	1.31	0.16	2.21	0.15	2.05	0.14	4.02	0.19	4.17	0.18	2.29	0.27	1.89	0.17	1.67	0.15
	MSE	-1.02	0.27	-1.09	0.24	-0.99	0.28	-0.33	0.19	-0.42	0.2	-0.11	0.24	-0.07	0.24	-1.18	0.29	0.77	0.1	0.68	0.11		MSE	-1.85	0.28	-0.13	0.18	-0.45	0.27	2.1	0.15	1.92	0.16	3.92	0.19	4.09	0.19	-1.87	0.29	1.5	0.25	1.29	0.23
	MUE	1.3	0.21	1.25	0.2	1.36	0.2	0.73	0.12	0.85	0.12	0.99	0.11	0.97	0.12	1.46	0.22	0.79	0.1	0.72	0.1		MUE	1.93	0.25	0.71	0.11	1.11	0.15	2.1	0.15	1.94	0.15	3.92	0.19	4.09	0.19	1.95	0.26	1.68	0.19	1.48	0.17
	βCD Hosts																						βCD Hosts
	Slope	0.79	0.13	0.82	0.12	0.72	0.15	0.77	0.11	0.75	0.13	0.81	0.12	0.73	0.13	0.91	0.13	0.36	0.11	0.43	0.09		Slope	0.73	0.13	0.66	0.08	0.74	0.14	0.57	0.09	0.63	0.08	0.61	0.1	0.59	0.09	0.69	0.13	0.04	0.23	0.18	0.22
	Intercept	-2.38	0.49	-2.14	0.46	-2.21	0.56	-1.39	0.41	-1.39	0.46	-0.96	0.46	-1.21	0.46	-1.69	0.5	-1.72	0.39	-1.35	0.29		Intercept	-1.89	0.29	0.09	0.17	-0.39	0.35	2.6	0.17	2.33	0.18	3.08	0.23	3.03	0.18	-1.84	0.26	1.15	0.46	1.29	0.5
	R2	0.54	0.13	0.59	0.13	0.46	0.14	0.62	0.13	0.56	0.14	0.61	0.12	0.54	0.14	0.59	0.14	0.36	0.15	0.49	0.14		R2	0.72	0.09	0.79	0.07	0.66	0.1	0.65	0.12	0.72	0.09	0.67	0.11	0.65	0.11	0.63	0.11	0.04	0.05	0.07	0.08
	Kendall's τ	0.53	0.12	0.55	0.12	0.5	0.13	0.58	0.11	0.51	0.13	0.59	0.12	0.52	0.13	0.57	0.13	0.41	0.13	0.49	0.11		Kendall's τ	0.56	0.11	0.65	0.1	0.55	0.1	0.54	0.12	0.56	0.1	0.55	0.11	0.53	0.11	0.53	0.12	0.01	0.15	0.1	0.14
	RMSE	1.95	0.16	1.82	0.15	1.7	0.17	1.02	0.12	1.03	0.12	0.86	0.11	0.92	0.13	1.68	0.13	0.92	0.11	0.86	0.1		RMSE	1.74	0.21	0.97	0.11	0.99	0.16	3.35	0.21	2.98	0.18	3.74	0.19	3.74	0.21	1.73	0.21	3.47	0.47	3.22	0.33
	MSE	-1.76	0.19	-1.63	0.18	-1.41	0.21	-0.71	0.16	-0.66	0.18	-0.41	0.17	-0.43	0.18	-1.44	0.19	0.17	0.2	0.3	0.18		MSE	-1.52	0.19	0.56	0.17	-0.04	0.22	3.21	0.22	2.85	0.19	3.62	0.21	3.61	0.22	-1.42	0.22	2.5	0.54	2.42	0.47
	MUE	1.78	0.18	1.65	0.17	1.51	0.17	0.87	0.12	0.89	0.12	0.71	0.11	0.75	0.12	1.56	0.14	0.78	0.11	0.74	0.1		MUE	1.52	0.19	0.83	0.11	0.78	0.14	3.21	0.22	2.85	0.19	3.62	0.21	3.61	0.22	1.48	0.2	2.84	0.45	2.8	0.35
	n-Alkyl Guests																						n-Alkyl Guests
	Slope	1.07	0.36	1.08	0.3	1.15	0.39	1	0.22	1.01	0.27	1.1	0.3	0.93	0.29	1.19	0.36	0.98	0.15	1.01	0.16		Slope	0.91	0.13	0.95	0.09	0.92	0.16	0.98	0.1	0.96	0.09	0.77	0.09	0.67	0.08	0.95	0.14	0.72	0.17	0.85	0.2
	Intercept	-1.11	1.19	-1.05	0.98	-0.67	1.33	-0.44	0.76	-0.43	0.91	0.12	1.03	-0.48	0.94	-0.71	1.22	0.41	0.55	0.48	0.55		Intercept	-2.24	0.46	-0.32	0.3	-0.77	0.54	2.28	0.3	2.06	0.31	3.1	0.29	3.08	0.26	-2.11	0.47	0.53	0.65	0.81	0.72
	R2	0.44	0.15	0.51	0.14	0.44	0.16	0.6	0.13	0.57	0.14	0.56	0.15	0.44	0.17	0.46	0.14	0.8	0.1	0.8	0.09		R2	0.74	0.09	0.9	0.04	0.71	0.09	0.91	0.05	0.92	0.03	0.85	0.06	0.84	0.08	0.75	0.08	0.62	0.12	0.7	0.14
	Kendall's τ	0.43	0.14	0.49	0.13	0.44	0.14	0.54	0.11	0.52	0.13	0.53	0.13	0.42	0.15	0.46	0.13	0.66	0.11	0.66	0.11		Kendall's τ	0.62	0.09	0.74	0.09	0.62	0.09	0.69	0.11	0.72	0.09	0.65	0.11	0.61	0.12	0.65	0.08	0.58	0.1	0.62	0.11
	RMSE	1.84	0.23	1.71	0.23	1.79	0.24	0.97	0.13	1.05	0.15	1.04	0.14	1.14	0.16	1.87	0.24	0.69	0.09	0.68	0.09		RMSE	2.42	0.27	0.78	0.12	1.52	0.16	2.44	0.2	2.27	0.18	3.75	0.24	3.97	0.27	2.4	0.28	1.86	0.27	1.76	0.25
	MSE	-1.34	0.33	-1.31	0.29	-1.16	0.36	-0.46	0.22	-0.49	0.24	-0.19	0.27	-0.28	0.29	-1.32	0.35	0.46	0.13	0.42	0.14		MSE	-2.07	0.33	-0.21	0.2	-0.61	0.36	2.34	0.19	2.17	0.18	3.63	0.24	3.84	0.27	-2.04	0.33	1.12	0.39	1.11	0.36
	MUE	1.53	0.27	1.39	0.26	1.52	0.25	0.83	0.13	0.89	0.15	0.89	0.14	0.99	0.15	1.57	0.27	0.6	0.09	0.58	0.09		MUE	2.12	0.31	0.67	0.11	1.36	0.18	2.34	0.19	2.17	0.18	3.63	0.24	3.84	0.27	2.09	0.31	1.54	0.28	1.5	0.25
	Aliphatic Carboxylate Guests																						Aliphatic Carboxylate Guests
	Slope	1.12	0.17	1.17	0.2	1.14	0.26	1.05	0.15	0.99	0.2	1.06	0.27	1.01	0.25	1.23	0.17	0.91	0.2	1	0.2		Slope	1.01	0.09	1.03	0.09	1.01	0.08	0.97	0.12	0.96	0.12	0.81	0.16	0.71	0.11	1.06	0.11	0.74	0.14	0.83	0.27
	Intercept	-2.07	0.5	-1.72	0.61	-1.86	0.81	-1.05	0.48	-1.24	0.64	-0.77	0.85	-1.11	0.79	-1.78	0.5	0	0.7	0.15	0.66		Intercept	-3.09	0.29	-0.71	0.3	-1.81	0.27	2.18	0.41	1.97	0.4	2.99	0.49	3.11	0.34	-2.97	0.35	-0.41	0.49	0.14	0.88
	R2	0.9	0.07	0.88	0.09	0.8	0.15	0.89	0.09	0.83	0.13	0.76	0.17	0.74	0.17	0.9	0.08	0.78	0.16	0.83	0.13		R2	0.97	0.03	0.97	0.03	0.97	0.03	0.94	0.05	0.94	0.06	0.88	0.12	0.9	0.1	0.97	0.03	0.87	0.1	0.76	0.18
	Kendall's τ	0.79	0.13	0.77	0.14	0.71	0.17	0.76	0.15	0.73	0.16	0.68	0.19	0.65	0.19	0.79	0.13	0.65	0.18	0.69	0.17		Kendall's τ	0.82	0.12	0.81	0.13	0.82	0.12	0.7	0.16	0.67	0.16	0.54	0.19	0.62	0.17	0.86	0.11	0.73	0.16	0.67	0.2
	RMSE	2.47	0.14	2.3	0.17	2.38	0.21	1.25	0.13	1.33	0.16	1.16	0.19	1.32	0.22	2.51	0.18	0.58	0.12	0.49	0.12		RMSE	3.17	0.16	0.89	0.16	1.88	0.15	2.32	0.2	2.13	0.21	3.47	0.31	3.74	0.32	3.17	0.18	0.94	0.27	1.27	0.36
	MSE	-2.44	0.15	-2.25	0.18	-2.3	0.23	-1.19	0.14	-1.25	0.17	-0.98	0.23	-1.17	0.23	-2.46	0.18	0.24	0.19	0.12	0.17		MSE	-3.15	0.16	-0.78	0.16	-1.84	0.15	2.25	0.21	2.05	0.22	3.37	0.31	3.64	0.33	-3.13	0.18	0.01	0.34	0.31	0.45
	MUE	2.44	0.15	2.25	0.18	2.3	0.23	1.19	0.14	1.25	0.17	1.02	0.2	1.18	0.23	2.46	0.18	0.49	0.11	0.41	0.11		MUE	3.15	0.16	0.8	0.15	1.84	0.15	2.25	0.21	2.05	0.22	3.37	0.31	3.64	0.33	3.13	0.18	0.76	0.22	1.02	0.29
	Aromatic Carboxylate Guests																						Aromatic Carboxylate Guests
	Slope	0.73	0.26	0.7	0.33	0.52	0.31	0.59	0.26	0.35	0.25	0.6	0.25	0.42	0.3	0.68	0.39	0.4	0.4	0.53	0.3		Slope	-0.04	0.71	0.33	0.79	-0.02	0.72	0.03	0.96	0.28	0.79	0.28	0.79	-0.13	1	0.03	0.61	-0.75	1.42	-0.34	1.37
	Intercept	-3.13	0.59	-2.98	0.74	-3.38	0.7	-2.32	0.6	-2.79	0.54	-2.03	0.54	-2.46	0.68	-2.67	0.88	-1.97	0.92	-1.45	0.67		Intercept	-3.68	1.82	-0.72	2.08	-2.63	1.89	1.23	2.45	1.35	2.07	2.35	2.06	1.15	2.65	-2.94	1.54	-2.31	3.8	-1.02	3.61
	R2	0.68	0.17	0.57	0.23	0.45	0.25	0.61	0.23	0.39	0.25	0.64	0.19	0.38	0.23	0.48	0.2	0.29	0.24	0.47	0.23		R2	0.15	0.18	0.21	0.22	0.16	0.19	0.14	0.16	0.14	0.16	0.13	0.15	0.14	0.17	0.17	0.19	0.22	0.21	0.17	0.19
	Kendall's τ	0.56	0.19	0.58	0.21	0.46	0.24	0.57	0.2	0.41	0.24	0.58	0.19	0.4	0.24	0.46	0.22	0.34	0.28	0.51	0.21		Kendall's τ	-0.01	0.3	0.21	0.31	0.03	0.31	0	0.31	0.09	0.29	0.07	0.28	-0.01	0.29	-0.02	0.31	-0.06	0.3	-0.11	0.29
	RMSE	2.51	0.16	2.32	0.18	2.31	0.2	1.42	0.14	1.39	0.17	1.16	0.14	1.23	0.19	1.95	0.22	0.91	0.17	0.66	0.12		RMSE	1.34	0.23	1.16	0.17	0.74	0.2	3.75	0.35	3.18	0.26	4.18	0.28	4.07	0.34	0.83	0.17	2.35	0.35	2.62	0.43
	MSE	-2.48	0.16	-2.27	0.19	-2.24	0.21	-1.34	0.17	-1.25	0.22	-1.06	0.17	-1.06	0.23	-1.86	0.22	-0.54	0.27	-0.31	0.21		MSE	-1.14	0.26	0.92	0.25	-0.11	0.27	3.64	0.34	3.1	0.27	4.11	0.28	3.95	0.36	-0.54	0.23	1.96	0.48	2.26	0.5
	MUE	2.48	0.16	2.27	0.19	2.24	0.21	1.35	0.17	1.27	0.21	1.07	0.16	1.09	0.21	1.86	0.22	0.79	0.17	0.57	0.12		MUE	1.15	0.26	1.05	0.18	0.6	0.17	3.64	0.34	3.1	0.27	4.11	0.28	3.95	0.36	0.7	0.17	2.11	0.38	2.32	0.46
	Description of Error Metrics
	Error metrics were computed by sampling with replacement. All values listed are the mean and SEM (in parentheses) of 100,000 bootstrap cycles
	Slope	The slope of a "y = mx + b" linear regression between the experiment and calculated values.
	Intercept	The intercept of a "y = mx + b" linear regression between the experiment and calculated values.
	R2	The coefficient of determination for a "y = mx + b" linear regression between the experiment and calculated values.
	Kendall's τ	The Kendall rank correlation coefficient.
	RMSE	The root-mean-square error.
	MSE	The mean signed error.
	MUE	The mean unsigned error.
	Ammonium Guests: a-bam, a-nmb, a-mba, a-pam, a-ham, a-nmh, a-mha, a-hpa, a-mhp, a-oam, b-ham, b-mha, b-oam
	Alcohol Guests: a-cbu, a-cpe, a-chp, a-coc, b-cbu, b-cpe, b-mch, b-m4c, b-m4t, b-chp, b-coc
	Carboxylate Guests: a-but, a-pnt, a-hex, a-hx2, a-hx3, a-hep, a-hp6, a-oct, b-pnt, b-hex, b-hep, b-ben, b-pha, b-mp3, b-mp4, b-mo3, b-mo4, b-pb3, b-pb4
	αCD Hosts: a-bam, a-nmb, a-mba, a-pam, a-ham, a-nmh, a-mha, a-hpa, a-mhp, a-oam, a-cbu, a-cpe, a-chp, a-coc, a-but, a-pnt, a-hex, a-hx2, a-hx3, a-hep, a-hp6, a-oct
	βCD Hosts: b-ham, b-mha, b-oam, b-cbu, b-cpe, b-mch, b-m4c, b-m4t, b-chp, b-coc, b-pnt, b-hex, b-hep, b-ben, b-pha, b-mp3, b-mp4, b-mo3, b-mo4, b-pb3, b-pb4
	n-Alkyl Guests: a-bam, a-pam, a-ham, a-hpa, a-oam, b-ham, b-oam, a-but, a-pnt, a-hex, a-hep, a-oct, b-pnt, b-hex, b-hep
	Aliphatic Carboxylates: a-but, a-pnt, a-hex, a-hep, a-oct, b-pnt, b-hex, b-hep
	Aromatic Carboxylates: b-ben, b-pha, b-mp3, b-mp4, b-mo3, b-mo4, b-pb3, b-pb4

## Sheet: S4 Q4RG-TIP3P
Table S4. Complete experimental and calculated thermodynamic values (kcal/mol) for the Q4RG-TIP3P data set. (See below for explanation of the columns.)
				Experiment					Calculated (Both Orientations Combined)											Calculated (Decomposed by Orientation)																					Entropic Contribution
	Host	GuestName	HG-ID	dG	SEM	dH	SEM		dG	SEM	dH	SEM	Val	SEM	LJ	SEM	Ele	SEM		dG-p	SEM	dG-s	SEM	dH-p	SEM	dH-s	SEM	Val-p	SEM	Val-s	SEM	LJ-p	SEM	LJ-s	SEM	Ele-p	SEM	Ele-s	SEM		-TdS-p	SEM	-TdS-s	SEM
	aCD	1-butylamine[+1]	a-bam	-1.575	0.019	-2.17	0.05		-0.79	0.18	-1.84	0.38	-3.66	0.23	-3.96	0.27	5.77	0.49		-0.68	0.21	0.37	0.21	-2.06	0.43	-0.66	0.26	-3.9	0.23	-2.34	0.21	-4.26	0.28	-2.38	0.16	6.09	0.55	4.05	0.41		1.38	0.478539	1.03	0.334215
	aCD	n-methylbutylamine[+1]	a-nmb	-1.685	0.018	-2.57	0.06		-1.22	0.17	-2.9	0.31	-4.62	0.35	-4.65	0.29	6.36	0.5		-1.05	0.21	-0.36	0.21	-3.52	0.25	-1.05	0.29	-5.47	0.18	-2.07	0.3	-5.33	0.17	-2.58	0.22	7.28	0.44	3.6	0.55		2.47	0.326497	0.69	0.35805
	aCD	1-methylbutylamine[+1]	a-mba	-1.764	0.02	-2.68	0.07		-0.93	0.2	-2.22	0.3	-3.19	0.23	-3.93	0.22	4.9	0.42		-0.85	0.22	0.38	0.22	-2.44	0.31	-0.57	0.35	-3.36	0.24	-1.97	0.21	-4.16	0.22	-2.26	0.16	5.07	0.46	3.66	0.49		1.59	0.380132	0.95	0.413401
	aCD	1-pentylamine[+1]	a-pam	-2.72	0.004	-3.28	0.02		-2.22	0.18	-3.68	0.32	-4.14	0.3	-4.94	0.26	5.39	0.47		-2.08	0.22	-1.24	0.22	-4.13	0.32	-2.01	0.28	-4.56	0.31	-2.52	0.21	-5.5	0.16	-2.81	0.16	5.94	0.51	3.32	0.44		2.05	0.38833	0.77	0.35609
	aCD	1-hexylamine[+1]	a-ham	-3.533	0.004	-4.19	0.02		-3.66	0.2	-5.38	0.29	-4.06	0.19	-5.78	0.18	4.47	0.38		-3.59	0.22	-2.24	0.22	-5.68	0.27	-2.68	0.3	-4.22	0.19	-2.69	0.22	-6.02	0.15	-3.69	0.16	4.55	0.42	3.7	0.47		2.09	0.348281	0.44	0.372022
	aCD	n-methylhexylamine[+1]	a-nmh	-3.516	0.012	-4.2	0.08		-3.92	0.2	-5.78	0.33	-4.37	0.22	-5.84	0.2	4.43	0.44		-3.83	0.23	-2.66	0.21	-6.19	0.31	-3.09	0.27	-4.63	0.21	-2.66	0.25	-6.15	0.16	-3.8	0.15	4.59	0.5	3.37	0.43		2.36	0.386005	0.43	0.342053
	aCD	1-methylhexylamine[+1]	a-mha	-3.604	0.004	-4.28	0.02		-3.9	0.2	-6.36	0.29	-4.11	0.18	-5.85	0.2	3.59	0.42		-3.85	0.22	-2.41	0.23	-6.68	0.26	-3.18	0.32	-4.25	0.19	-2.75	0.21	-6.08	0.18	-3.55	0.17	3.64	0.46	3.12	0.51		2.83	0.340588	0.77	0.394081
	aCD	1-heptylamine[+1]	a-hpa	-4.137	0.004	-4.66	0.02		-4.25	0.18	-5.58	0.32	-3.44	0.21	-5.57	0.26	3.43	0.4		-4.08	0.23	-3.36	0.23	-6.13	0.29	-3.86	0.32	-3.75	0.21	-2.46	0.2	-6.13	0.16	-3.82	0.16	3.75	0.48	2.42	0.43		2.05	0.370135	0.5	0.394081
	aCD	1-methylheptylamine[+1]	a-mhp	-4.166	0.004	-4.74	0.02		-4.9	0.19	-6.73	0.34	-3.9	0.19	-6.17	0.22	3.35	0.33		-4.79	0.22	-3.74	0.25	-7.28	0.26	-3.77	0.27	-4.17	0.17	-2.47	0.18	-6.53	0.17	-4.27	0.17	3.42	0.38	2.98	0.4		2.49	0.340588	0.03	0.367967
	aCD	1-octylamine[+1]	a-oam	-4.606	0.007	-5.46	0.03		-5.61	0.2	-6.79	0.29	-3.28	0.19	-5.85	0.19	2.34	0.4		-5.55	0.22	-4.15	0.22	-6.99	0.3	-4.91	0.34	-3.37	0.2	-2.42	0.21	-5.99	0.19	-4.43	0.14	2.38	0.44	1.95	0.42		1.44	0.372022	0.76	0.404969
	bCD	1-hexylamine[+1]	b-ham	-2.486	0.084	0.6	0.05		-2.76	0.2	-0.88	0.25	-3.14	0.21	-2.25	0.14	4.51	0.42		-2.72	0.22	-1.11	0.22	-0.99	0.26	0.73	0.29	-3.29	0.2	-1.04	0.29	-2.32	0.15	-1.23	0.16	4.62	0.44	3	0.51		-1.73	0.340588	-1.84	0.364005
	bCD	1-methylhexylamine[+1]	b-mha	-2.557	0.066	0.47	0.03		-2.49	0.19	-0.36	0.3	-2.52	0.17	-2.37	0.16	4.52	0.44		-2.41	0.21	-1.21	0.21	-0.6	0.31	1.23	0.39	-2.66	0.18	-1.6	0.3	-2.5	0.17	-1.45	0.19	4.56	0.49	4.28	0.65		-1.81	0.374433	-2.44	0.442945
	bCD	1-octylamine[+1]	b-oam	-3.585	0.12	-0.48	0.03		-4	0.17	-1.33	0.29	-1.68	0.17	-2	0.15	2.35	0.41		-3.82	0.21	-3.14	0.21	-1.81	0.29	0.1	0.31	-1.67	0.2	-1.7	0.28	-2.16	0.18	-1.55	0.16	2.02	0.49	3.34	0.44		-2.01	0.35805	-3.24	0.374433
	aCD	cyclobutanol[0]	a-cbu	-2.022	0.016	-2.75	0.05		-2.32	0.18	-3.21	0.24	-2.04	0.18	-3.36	0.16	2.19	0.37		-0.92	0.23	-2.26	0.2	-2.67	0.42	-3.27	0.26	-0.88	0.37	-2.18	0.18	-3.53	0.18	-3.34	0.18	1.74	0.56	2.24	0.41		1.75	0.478853	1.01	0.328024
	aCD	cyclopentanol[0]	a-cpe	-2.13	0.016	-2.74	0.02		-3.16	0.23	-3.94	0.26	-1.63	0.21	-3.6	0.12	1.29	0.42		-2.3	0.55	-2.93	0.2	-3.88	0.29	-3.97	0.33	-1.64	0.18	-1.63	0.27	-3.81	0.16	-3.51	0.13	1.57	0.46	1.17	0.52		1.58	0.621772	1.04	0.385876
	aCD	cycloheptanol[0]	a-chp	-2.51	0.06	-2.99	0.23		-3.09	0.21	-4.96	0.27	-1.14	0.21	-3.27	0.13	-0.55	0.34		-0.27	0.23	-3.08	0.21	-1.5	0.31	-5	0.28	2.07	0.16	-1.18	0.21	-2.37	0.19	-3.28	0.13	-1.2	0.55	-0.54	0.34		1.23	0.386005	1.92	0.35
	aCD	cyclooctanol[0]	a-coc	-3.227	1.135	-0.93	0.32		-3.34	0.22	-5.3	0.24	-1.62	0.21	-3.04	0.15	-0.64	0.38		-0.22	0.24	-3.34	0.22	-0.53	0.3	-5.33	0.24	2.66	0.18	-1.64	0.21	-1.55	0.21	-3.04	0.16	-1.64	0.44	-0.64	0.38		0.31	0.384187	1.99	0.325576
	bCD	cyclobutanol[0]	b-cbu	-1.554	0.167	0.88	0.17		-2.53	0.16	-0.37	0.24	-1.32	0.23	-1.32	0.13	2.28	0.35		-1.95	0.22	-2.23	0.21	-0.7	0.27	-0.16	0.32	-1.43	0.19	-1.25	0.34	-1.63	0.14	-1.13	0.15	2.36	0.43	2.23	0.48		-1.25	0.348281	-2.07	0.382753
	bCD	cyclopentanol[0]	b-cpe	-3.05	0.01	-1.09	0.01		-4.37	0.17	-2.78	0.27	-2	0.24	-3.26	0.12	2.48	0.37		-3.58	0.21	-4.17	0.21	-2.55	0.3	-2.87	0.34	-1.9	0.22	-2.04	0.32	-3.5	0.16	-3.17	0.15	2.85	0.5	2.34	0.47		-1.03	0.366197	-1.3	0.399625
	bCD	1-methylcyclohexanol[0]	b-mch	-4.175	0.01	-2.29	0.03		-6.29	0.16	-3.53	0.27	-0.58	0.2	-3.61	0.12	0.66	0.42		-5.98	0.22	-5.71	0.21	-3.38	0.37	-3.78	0.3	-0.56	0.29	-0.61	0.2	-3.58	0.17	-3.67	0.15	0.76	0.61	0.5	0.45		-2.6	0.430465	-1.93	0.366197
	bCD	cis-4-methylcyclohexanol[0]	b-m4c	-4.319	0.006	-2.27	0.01		-5.47	0.15	-3.93	0.26	-1.57	0.27	-3.84	0.15	1.48	0.45		-4.98	0.21	-5.1	0.21	-3.88	0.46	-3.97	0.27	-2.44	0.32	-0.85	0.2	-4.16	0.14	-3.58	0.2	2.72	0.58	0.47	0.42		-1.1	0.505668	-1.13	0.342053
	bCD	trans-4-methylcyclohexanol[0]	b-m4t	-4.541	0.008	-2.17	0.02		-5.99	0.16	-3.68	0.21	-1.56	0.2	-3.67	0.15	1.55	0.38		-5.3	0.21	-5.74	0.21	-3.6	0.31	-3.73	0.26	-1.94	0.24	-1.37	0.25	-3.29	0.19	-3.86	0.18	1.63	0.54	1.5	0.49		-1.7	0.374433	-2.01	0.334215
	bCD	cycloheptanol[0]	b-chp	-4.56	0.011	-2.96	0.01		-6.31	0.17	-4.51	0.29	-1.24	0.2	-4.31	0.15	1.05	0.47		-5.65	0.23	-6.04	0.22	-4.09	0.35	-4.73	0.37	-1.32	0.26	-1.2	0.26	-4.38	0.18	-4.27	0.2	1.61	0.53	0.74	0.63		-1.56	0.418808	-1.31	0.430465
	bCD	cyclooctanol[0]	b-coc	-4.971	0.036	-3.92	0.06		-6.62	0.16	-5.24	0.19	-1.04	0.19	-4.92	0.15	0.73	0.38		-6.13	0.22	-6.24	0.21	-5.18	0.26	-5.29	0.25	-1.26	0.21	-0.86	0.27	-4.93	0.17	-4.91	0.23	1.01	0.47	0.48	0.53		-0.95	0.340588	-0.95	0.326497
	aCD	butanoate[-1]	a-but	-1.506	0.036	-2.53	0.12		-4.14	0.18	-5.28	0.23	-0.78	0.35	-3.59	0.19	-0.91	0.49		-3	0.25	-4.03	0.21	-6.14	0.26	-5.12	0.25	-3.98	0.21	-0.16	0.24	-5.18	0.16	-3.29	0.15	3.02	0.4	-1.66	0.41		3.14	0.360694	1.09	0.326497
	aCD	pentanoate[-1]	a-pnt	-2.596	0.005	-2.75	0.01		-5.04	0.18	-5.82	0.27	-1.36	0.42	-3.95	0.21	-0.51	0.55		-4.07	0.26	-4.89	0.22	-7.11	0.24	-5.47	0.27	-4.48	0.22	-0.51	0.26	-5.43	0.15	-3.54	0.13	2.8	0.39	-1.41	0.48		3.04	0.353836	0.58	0.348281
	aCD	hexanoate[-1]	a-hex	-3.38	0.005	-3.4	0.02		-5.88	0.18	-6.83	0.28	-1.07	0.36	-4.62	0.19	-1.14	0.5		-4.87	0.23	-5.75	0.22	-8.26	0.29	-6.48	0.28	-4.08	0.26	-0.33	0.21	-5.73	0.13	-4.35	0.19	1.55	0.44	-1.8	0.5		3.39	0.370135	0.73	0.35609
	aCD	trans-2-hexenoate[-1]	a-hx2	-3.344	0.01	-4.12	0.06		-5.72	0.18	-6.61	0.32	-1.12	0.29	-3.98	0.16	-1.51	0.34		-4.89	0.24	-5.53	0.23	-8.09	0.3	-6.07	0.3	-2.67	0.22	-0.56	0.23	-4.66	0.15	-3.73	0.16	-0.76	0.41	-1.78	0.4		3.2	0.384187	0.54	0.378021
	aCD	trans-3-hexenoate[-1]	a-hx3	-3.011	0.01	-3.36	0.05		-5.35	0.18	-6.31	0.22	-0.96	0.19	-3.78	0.17	-1.57	0.34		-4.36	0.23	-5.21	0.22	-7.05	0.29	-6.12	0.24	-1.77	0.32	-0.75	0.2	-4.93	0.17	-3.48	0.14	-0.35	0.43	-1.89	0.38		2.69	0.370135	0.91	0.325576
	aCD	heptanoate[-1]	a-hep	-3.991	0.013	-4.19	0.09		-6.85	0.2	-7.29	0.27	-0.25	0.23	-4.88	0.15	-2.17	0.4		-5.43	0.23	-6.78	0.22	-8.29	0.28	-7.18	0.29	-3.19	0.2	0.09	0.17	-5.76	0.16	-4.77	0.16	0.67	0.45	-2.49	0.41		2.86	0.362353	0.4	0.364005
	aCD	6-heptenoate[-1]	a-hp6	-3.597	0.004	-4.48	0.02		-5.91	0.18	-7.01	0.36	-1.72	0.65	-5.55	0.29	0.26	0.68		-5.29	0.27	-5.62	0.22	-8.48	0.24	-6.14	0.27	-4.8	0.22	0.12	0.18	-6.82	0.14	-4.79	0.17	3.14	0.36	-1.47	0.45		3.19	0.361248	0.52	0.348281
	aCD	octanoate[-1]	a-oct	-4.622	0.017	-4.89	0.03		-7.53	0.19	-8.32	0.22	-0.34	0.35	-5.18	0.14	-2.8	0.46		-6.47	0.23	-7.4	0.23	-8.9	0.33	-8.18	0.24	-3.39	0.25	0.35	0.19	-5.9	0.17	-5.02	0.15	0.39	0.52	-3.52	0.39		2.43	0.402244	0.78	0.332415
	bCD	pentanoate[-1]	b-pnt	-1.267	0.323	1.89	0.53		-3.57	0.18	-1.28	0.27	-0.27	0.28	-1.41	0.16	0.4	0.45		-2.64	0.24	-3.41	0.22	-1.95	0.25	-1.08	0.32	-1.36	0.79	0.05	0.19	-1.79	0.16	-1.3	0.19	1.19	0.98	0.16	0.48		-0.69	0.346554	-2.33	0.38833
	bCD	hexanoate[-1]	b-hex	-2.28	0.03	1.31	0.04		-4.27	0.17	-2.23	0.28	-0.61	0.26	-1.31	0.15	-0.31	0.52		-3.48	0.22	-4.06	0.23	-2.29	0.26	-2.2	0.37	-1.97	0.22	-0.08	0.22	-1.84	0.14	-1.1	0.17	1.52	0.4	-1.03	0.59		-1.19	0.340588	-1.86	0.43566
	bCD	heptanoate[-1]	b-hep	-3.394	0.179	0.42	0.04		-5.27	0.2	-2.28	0.35	-0.09	0.22	-1.44	0.17	-0.75	0.52		-3.8	0.22	-5.21	0.22	-2.72	0.3	-2.24	0.38	-1.21	0.21	0.02	0.24	-1.46	0.17	-1.44	0.19	-0.04	0.48	-0.82	0.57		-1.08	0.372022	-2.97	0.43909
	bCD	benzoate[-1]	b-ben	-1.64	0.024	-2.51	0.08		-3.84	0.19	-2.73	0.26	-0.42	0.22	-3.44	0.19	1.13	0.48		-2.69	0.21	-3.73	0.23	-3.74	0.35	-2.54	0.29	-2.11	0.28	-0.1	0.19	-3.23	0.16	-3.47	0.22	1.61	0.6	1.04	0.56		1.05	0.408167	-1.19	0.370135
	bCD	phenylacetate[-1]	b-pha	-1.697	0.048	-1.79	0.11		-4.14	0.2	-3.62	0.33	-0.67	0.22	-3.81	0.16	0.86	0.54		-2.94	0.22	-4.04	0.23	-4.18	0.44	-3.53	0.38	-1.87	0.22	-0.47	0.22	-4.03	0.19	-3.78	0.18	1.73	0.55	0.72	0.61		1.24	0.491935	-0.51	0.444185
	bCD	3-methylphenylacetate[-1]	b-mp3	-1.458	0.036	-2.75	0.13		-4.59	0.2	-3.47	0.27	0.02	0.36	-3.91	0.14	0.42	0.45		-3.09	0.24	-4.53	0.22	-3.94	0.37	-3.42	0.29	-0.97	0.41	0.12	0.38	-3.99	0.16	-3.9	0.15	1.03	0.53	0.36	0.49		0.85	0.441022	-1.11	0.364005
	bCD	4-methylphenylacetate[-1]	b-mp4	-2.192	0.013	-2.89	0.05		-4.66	0.17	-3.14	0.29	0.03	0.3	-3.15	0.18	-0.02	0.44		-3.91	0.24	-4.44	0.22	-4.09	0.43	-2.73	0.29	-1.3	0.55	0.61	0.18	-3.97	0.18	-2.8	0.15	1.17	0.7	-0.54	0.47		0.18	0.492443	-1.71	0.364005
	bCD	3-methoxyphenylacetate[-1]	b-mo3	-2.156	0.01	-2.93	0.03		-4.7	0.19	-4.62	0.3	0.19	0.32	-4.57	0.14	-0.24	0.51		-3.92	0.26	-4.48	0.25	-5.13	0.31	-4.41	0.38	-1.14	0.29	0.74	0.28	-4.88	0.19	-4.44	0.16	0.89	0.45	-0.71	0.63		1.21	0.404599	-0.07	0.454863
	bCD	4-methoxyphenylacetate[-1]	b-mo4	-2.512	0.007	-1.96	0.01		-5.56	0.2	-3.92	0.28	0.49	0.2	-3.35	0.18	-1.07	0.48		-3.85	0.23	-5.52	0.22	-5.52	0.3	-3.81	0.29	-1.54	0.3	0.63	0.19	-4.46	0.18	-3.27	0.18	0.48	0.57	-1.17	0.5		1.67	0.378021	-1.71	0.364005
	bCD	3-phenylbutanoate[-1]	b-pb3	-3.518	0.007	-2.25	0.01		-5.55	0.22	-3.99	0.25	-2.02	0.64	-3.83	0.13	1.86	0.81		-4.39	0.23	-5.44	0.26	-4.03	0.39	-3.98	0.29	-7.91	0.35	-0.9	0.4	-3.9	0.14	-3.82	0.16	7.78	0.53	0.74	0.7		-0.36	0.452769	-1.46	0.389487
	bCD	4-phenylbutanoate[-1]	b-pb4	-3.599	0.018	-2.82	0.01		-5.55	0.19	-3.5	0.28	0.05	0.26	-3.39	0.13	-0.17	0.43		-4.4	0.24	-5.44	0.22	-3.52	0.52	-3.5	0.31	-0.77	0.81	0.21	0.24	-3.57	0.21	-3.35	0.15	0.83	0.68	-0.36	0.48		-0.88	0.572713	-1.94	0.380132
Column Heading Abbreviations
Host: aCD = αCD, bCD = βCD
GuestName: guest[charge]
HG-ID: host-guest ID abbreviation
dG: ΔG_binding, combined orientation
dH: ΔH_binding, combined orientation
Val: Valence energy; includes bonds, angles dihedrals,
and 1-4 terms
LJ: Lennard-Jones energy
Ele: Electrostatic energy
SEM: Standard Error of the Mean; each SEM column is
associated with the mean values immediately at left.
-p suffix: value for the primary orientation only
-s suffix: value for the secondary orientation only
-TdS-p: -TΔS; the entropic component of the binding free
energy for the primary orientation
-TdS-s: -TΔS; the entropic component of the binding free
energy for the secondary orientation

## Sheet: S5 Q4RG-TIP3P-sxx
Table S5. Complete experimental and calculated thermodynamic values (kcal/mol) for the Q4RG-TIP3P-sm1, -sm2, -sm3, and -shw data set. (See below for explanation of the columns.)
					Experiment					Calculated											Calculated (Decomposed by Orientation)																					Entropic Contribution
		Host	GuestName	HG-ID	dG	SEM	dH	SEM		dG	SEM	dH	SEM	Val	SEM	LJ	SEM	Ele	SEM		dG-p	SEM	dG-s	SEM	dH-p	SEM	dH-s	SEM	Val-p	SEM	Val-s	SEM	LJ-p	SEM	LJ-s	SEM	Ele-p	SEM	Ele-s	SEM		-TdS-p	SEM	-TdS-s	SEM
Q4RG-TIP3P-sm1		aCD	1-hexylamine[+1]	a-ham	-3.533	0.004	-4.19	0.02		-3.46	0.19	-5.16	0.34	-3.94	0.18	-5.72	0.17	4.49	0.33		-3.38	0.22	-2.14	0.22	-5.46	0.36	-2.99	0.28	-4.08	0.18	-2.87	0.19	-6	0.13	-3.67	0.13	4.62	0.37	3.56	0.42		2.08	0.4219	0.85	0.35609
		aCD	n-methylhexylamine[+1]	a-nmh	-3.516	0.012	-4.2	0.08		-3.77	0.18	-5.36	0.31	-4.18	0.19	-6.01	0.24	4.83	0.33		-3.65	0.21	-2.72	0.22	-5.9	0.25	-2.96	0.27	-4.49	0.16	-2.78	0.21	-6.52	0.14	-3.73	0.16	5.11	0.37	3.55	0.46		2.25	0.326497	0.24	0.348281
		aCD	1-methylhexylamine[+1]	a-mha	-3.604	0.004	-4.28	0.02		-3.93	0.21	-6.12	0.26	-4.06	0.24	-6.22	0.17	4.16	0.36		-3.89	0.22	-2.23	0.22	-6.34	0.25	-2.89	0.23	-4.16	0.25	-2.61	0.25	-6.39	0.15	-3.72	0.15	4.21	0.38	3.43	0.4		2.45	0.333017	0.66	0.318277
		aCD	1-heptylamine[+1]	a-hpa	-4.137	0.004	-4.66	0.02		-4.46	0.18	-5.47	0.32	-3.4	0.18	-5.67	0.24	3.6	0.3		-4.29	0.23	-3.56	0.23	-6	0.31	-3.74	0.24	-3.63	0.19	-2.65	0.17	-6.2	0.14	-3.99	0.15	3.82	0.35	2.9	0.41		1.71	0.386005	0.18	0.332415
		bCD	1-hexylamine[+1]	b-ham	-2.486	0.084	0.6	0.05		-2.35	0.23	-0.65	0.26	-3.03	0.25	-2.2	0.16	4.58	0.45		-2.29	0.26	-0.85	0.25	-0.75	0.27	0.33	0.28	-3.22	0.25	-1.19	0.17	-2.33	0.15	-0.94	0.16	4.8	0.47	2.47	0.4		-1.54	0.374833	-1.18	0.375366
		bCD	1-methylhexylamine[+1]	b-mha	-2.557	0.066	0.47	0.03		-2.36	0.22	-0.7	0.3	-2.37	0.23	-2.29	0.19	3.95	0.42		-2.24	0.25	-1.25	0.33	-1	0.29	0.65	0.37	-2.63	0.21	-1.14	0.22	-2.53	0.16	-1.18	0.26	4.17	0.46	2.98	0.6		-1.24	0.382884	-1.9	0.495782
		aCD	cycloheptanol[0]	a-chp	-2.51	0.06	-2.99	0.23		-3.18	0.21	-5.46	0.37	-1.46	0.2	-2.88	0.13	-1.12	0.48		-0.59	0.22	-3.17	0.22	-2.03	0.22	-5.51	0.37	2.35	0.21	-1.51	0.21	-1.99	0.19	-2.89	0.13	-2.39	0.39	-1.1	0.49		1.44	0.311127	2.34	0.430465
		bCD	1-methylcyclohexanol[0]	b-mch	-4.175	0.01	-2.29	0.03		-5.79	0.23	-4.6	0.42	-1.69	0.28	-4.03	0.24	1.13	0.45		-4.56	0.26	-5.69	0.26	-3.73	0.37	-4.74	0.47	-0.51	0.25	-1.89	0.3	-3.62	0.22	-4.1	0.27	0.4	0.66	1.25	0.51		-0.83	0.452217	-0.95	0.537122
		bCD	cycloheptanol[0]	b-chp	-4.56	0.011	-2.96	0.01		-6.04	0.18	-4.66	0.19	-1.47	0.15	-4.48	0.11	1.29	0.31		-5.38	0.25	-5.77	0.24	-4.63	0.32	-4.68	0.23	-1.49	0.25	-1.46	0.18	-4.33	0.14	-4.56	0.14	1.19	0.5	1.34	0.38		-0.75	0.406079	-1.09	0.332415
		aCD	heptanoate[-1]	a-hep	-3.991	0.013	-4.19	0.09		-6.47	0.19	-7.65	0.25	-0.51	0.29	-4.85	0.14	-2.3	0.42		-5.37	0.23	-6.35	0.22	-8.4	0.3	-7.5	0.28	-3.19	0.28	0.05	0.18	-5.67	0.15	-4.68	0.15	0.47	0.43	-2.87	0.39		3.03	0.378021	1.15	0.35609
		bCD	heptanoate[-1]	b-hep	-3.394	0.179	0.42	0.04		-5.12	0.22	-2.52	0.3	-0.06	0.18	-1.38	0.15	-1.08	0.4		-3.89	0.25	-5.02	0.26	-2.92	0.32	-2.45	0.34	-0.92	0.26	0.08	0.19	-1.52	0.16	-1.35	0.18	-0.48	0.46	-1.18	0.46		-0.97	0.406079	-2.57	0.428019
		bCD	benzoate[-1]	b-ben	-1.64	0.024	-2.51	0.08		-3.47	0.2	-3	0.24	-0.85	0.32	-3.45	0.14	1.3	0.49		-2.59	0.26	-3.29	0.25	-3.69	0.23	-2.77	0.27	-2.44	0.25	-0.31	0.28	-3.21	0.14	-3.53	0.17	1.95	0.45	1.08	0.61		1.1	0.347131	-0.52	0.367967
		bCD	4-methylphenylacetate[-1]	b-mp4	-2.192	0.013	-2.89	0.05		-4.38	0.21	-3.14	0.36	-0.05	0.28	-3.1	0.17	0.01	0.49		-3.37	0.26	-4.24	0.26	-4.57	0.32	-2.78	0.38	-1.64	0.34	0.35	0.23	-3.83	0.18	-2.92	0.18	0.9	0.56	-0.21	0.58		1.2	0.412311	-1.46	0.460435
		bCD	4-methoxyphenylacetate[-1]	b-mo4	-2.512	0.007	-1.96	0.01		-4.73	0.21	-4.28	0.31	0.1	0.28	-3.51	0.16	-0.87	0.4		-3.68	0.26	-4.6	0.26	-5.6	0.31	-3.98	0.32	-1.71	0.23	0.52	0.23	-4.44	0.16	-3.29	0.15	0.55	0.46	-1.21	0.44		1.92	0.404599	-0.62	0.412311
		bCD	4-phenylbutanoate[-1]	b-pb4	-3.599	0.018	-2.82	0.01		-5.74	0.21	-3.63	0.23	-0.16	0.37	-3.39	0.13	-0.08	0.47		-4.77	0.26	-5.58	0.26	-3.97	0.28	-3.53	0.27	-2.43	0.31	0.48	0.26	-3.55	0.16	-3.35	0.15	2.01	0.51	-0.66	0.47		-0.8	0.382099	-2.05	0.374833
Q4RG-TIP3P-sm2		aCD	1-hexylamine[+1]	a-ham	-3.533	0.004	-4.19	0.02		-3.4	0.19	-5.26	0.27	-4.02	0.2	-5.6	0.19	4.36	0.33		-3.31	0.22	-2.14	0.22	-5.6	0.25	-2.99	0.32	-4.24	0.2	-2.56	0.19	-5.92	0.14	-3.47	0.14	4.56	0.36	3.05	0.42		2.29	0.333017	0.85	0.38833
		aCD	n-methylhexylamine[+1]	a-nmh	-3.516	0.012	-4.2	0.08		-3.89	0.19	-5.51	0.31	-4.28	0.23	-6.01	0.22	4.77	0.43		-3.81	0.21	-2.59	0.22	-5.9	0.28	-2.77	0.28	-4.54	0.22	-2.42	0.17	-6.34	0.18	-3.65	0.16	4.98	0.47	3.3	0.46		2.09	0.35	0.18	0.35609
		aCD	1-methylhexylamine[+1]	a-mha	-3.604	0.004	-4.28	0.02		-3.83	0.18	-5.89	0.35	-3.99	0.27	-5.72	0.3	3.82	0.45		-3.69	0.22	-2.84	0.22	-6.48	0.31	-3.59	0.25	-4.28	0.3	-2.87	0.23	-6.29	0.22	-3.47	0.16	4.09	0.53	2.75	0.48		2.79	0.380132	0.75	0.333017
		aCD	1-heptylamine[+1]	a-hpa	-4.137	0.004	-4.66	0.02		-4.85	0.21	-6.33	0.28	-3.73	0.19	-5.78	0.17	3.17	0.44		-4.81	0.23	-3.24	0.23	-6.54	0.28	-3.77	0.32	-3.84	0.19	-2.24	0.21	-5.93	0.16	-3.9	0.14	3.24	0.47	2.36	0.39		1.73	0.362353	0.53	0.394081
		bCD	1-hexylamine[+1]	b-ham	-2.486	0.084	0.6	0.05		-2.24	0.18	-0.37	0.31	-2.72	0.21	-1.96	0.17	4.31	0.39		-2.1	0.22	-1.25	0.23	-0.74	0.33	1.08	0.3	-3.01	0.2	-1.61	0.25	-2.16	0.18	-1.18	0.17	4.42	0.47	3.87	0.49		-1.36	0.396611	-2.33	0.378021
		bCD	1-methylhexylamine[+1]	b-mha	-2.557	0.066	0.47	0.03		-2.69	0.2	-0.38	0.32	-2.74	0.23	-2.51	0.15	4.86	0.4		-2.63	0.22	-1.22	0.23	-0.51	0.34	0.84	0.3	-2.86	0.24	-1.52	0.25	-2.64	0.15	-1.23	0.14	4.99	0.43	3.58	0.5		-2.12	0.404969	-2.06	0.378021
		aCD	cycloheptanol[0]	a-chp	-2.51	0.06	-2.99	0.23		-2.84	0.23	-5.03	0.21	-1.52	0.18	-3.18	0.14	-0.32	0.41		-0.48	0.23	-2.83	0.24	-1.79	0.25	-5.1	0.21	1.9	0.16	-1.6	0.18	-2.03	0.15	-3.21	0.14	-1.67	0.36	-0.29	0.41		1.31	0.339706	2.27	0.318904
		bCD	1-methylcyclohexanol[0]	b-mch	-4.175	0.01	-2.29	0.03		-5.82	0.17	-4.05	0.21	-1.01	0.2	-3.81	0.12	0.76	0.33		-5.49	0.24	-5.27	0.23	-4.15	0.27	-3.92	0.29	-1.31	0.24	-0.59	0.25	-3.9	0.14	-3.69	0.17	1.06	0.44	0.35	0.43		-1.34	0.361248	-1.35	0.370135
		bCD	cycloheptanol[0]	b-chp	-4.56	0.011	-2.96	0.01		-6.03	0.16	-4.39	0.22	-1.18	0.14	-4.29	0.12	1.08	0.34		-5.44	0.22	-5.73	0.22	-4.11	0.32	-4.57	0.27	-1.3	0.19	-1.1	0.17	-4.41	0.15	-4.22	0.17	1.6	0.47	0.75	0.42		-1.33	0.38833	-1.16	0.348281
		aCD	heptanoate[-1]	a-hep	-3.991	0.013	-4.19	0.09		-6.74	0.2	-7.54	0.25	-0.3	0.29	-4.9	0.14	-2.34	0.39		-5.55	0.24	-6.65	0.23	-9.05	0.26	-7.28	0.25	-3.37	0.25	0.23	0.17	-5.39	0.14	-4.81	0.16	-0.29	0.37	-2.7	0.4		3.5	0.353836	0.63	0.339706
		bCD	heptanoate[-1]	b-hep	-3.394	0.179	0.42	0.04		-5.01	0.19	-2.73	0.25	0.04	0.21	-1.4	0.15	-1.37	0.46		-4	0.22	-4.88	0.22	-2.96	0.35	-2.67	0.29	-1.19	0.19	0.34	0.2	-1.55	0.2	-1.36	0.18	-0.23	0.53	-1.65	0.54		-1.04	0.413401	-2.21	0.364005
		bCD	benzoate[-1]	b-ben	-1.64	0.024	-2.51	0.08		-3.87	0.2	-3.42	0.22	-0.68	0.28	-3.45	0.13	0.71	0.43		-2.42	0.23	-3.81	0.23	-3.36	0.31	-3.43	0.24	-2.16	0.27	-0.52	0.3	-3.36	0.15	-3.46	0.14	2.15	0.46	0.55	0.47		0.94	0.386005	-0.38	0.332415
		bCD	4-methylphenylacetate[-1]	b-mp4	-2.192	0.013	-2.89	0.05		-4.64	0.19	-3.19	0.29	0.26	0.26	-3.13	0.19	-0.31	0.47		-3.61	0.24	-4.51	0.23	-4.39	0.32	-2.9	0.31	-1.66	0.29	0.72	0.19	-3.96	0.15	-2.93	0.21	1.22	0.57	-0.69	0.52		0.78	0.4	-1.61	0.386005
		bCD	4-methoxyphenylacetate[-1]	b-mo4	-2.512	0.007	-1.96	0.01		-5.54	0.21	-3.69	0.29	0.39	0.21	-3.59	0.15	-0.49	0.39		-4.03	0.23	-5.48	0.23	-5.37	0.26	-3.53	0.31	-1.82	0.22	0.61	0.19	-4.6	0.17	-3.49	0.15	1.05	0.42	-0.64	0.42		1.34	0.347131	-1.95	0.386005
		bCD	4-phenylbutanoate[-1]	b-pb4	-3.599	0.018	-2.82	0.01		-5.94	0.19	-3.28	0.24	-0.37	0.32	-3.47	0.13	0.56	0.36		-4.93	0.23	-5.8	0.22	-4.15	0.28	-3.06	0.27	-2.18	0.26	0.09	0.32	-3.33	0.17	-3.5	0.15	1.37	0.51	0.35	0.41		-0.78	0.362353	-2.74	0.348281
Q4RG-TIP3P-sm3		aCD	1-hexylamine[+1]	a-ham	-3.533	0.004	-4.19	0.02		-3.57	0.19	-5.38	0.31	-3.67	0.15	-5.41	0.18	3.71	0.34		-3.47	0.22	-2.39	0.22	-5.79	0.3	-3.08	0.24	-3.83	0.15	-2.8	0.18	-5.74	0.13	-3.57	0.16	3.78	0.39	3.29	0.4		2.32	0.372022	0.69	0.325576
		aCD	n-methylhexylamine[+1]	a-nmh	-3.516	0.012	-4.2	0.08		-4.11	0.19	-5.81	0.27	-4.14	0.18	-5.9	0.22	4.23	0.47		-4.05	0.21	-2.63	0.22	-6.09	0.26	-3.09	0.3	-4.3	0.17	-2.61	0.21	-6.11	0.22	-3.88	0.15	4.32	0.51	3.4	0.41		2.04	0.334215	0.46	0.372022
		aCD	1-methylhexylamine[+1]	a-mha	-3.604	0.004	-4.28	0.02		-4.06	0.19	-5.78	0.29	-4.09	0.28	-5.83	0.25	4.15	0.34		-3.95	0.22	-2.96	0.22	-6.27	0.23	-3.32	0.31	-4.38	0.3	-2.63	0.2	-6.31	0.15	-3.48	0.21	4.42	0.35	2.78	0.63		2.32	0.318277	0.36	0.380132
		aCD	1-heptylamine[+1]	a-hpa	-4.137	0.004	-4.66	0.02		-4.7	0.19	-5.81	0.27	-3.36	0.19	-5.46	0.19	3.01	0.31		-4.57	0.23	-3.7	0.22	-6.17	0.28	-4.35	0.21	-3.56	0.2	-2.56	0.25	-5.82	0.14	-3.99	0.14	3.21	0.36	2.2	0.36		1.6	0.362353	0.65	0.304138
		bCD	1-hexylamine[+1]	b-ham	-2.486	0.084	0.6	0.05		-2.55	0.19	-0.3	0.34	-3.2	0.22	-2.17	0.15	5.06	0.44		-2.48	0.21	-1.15	0.21	-0.53	0.37	1.61	0.3	-3.42	0.22	-1.25	0.26	-2.25	0.16	-1.52	0.24	5.14	0.48	4.38	0.63		-1.95	0.425441	-2.76	0.366197
		bCD	1-methylhexylamine[+1]	b-mha	-2.557	0.066	0.47	0.03		-2.61	0.2	-0.63	0.26	-2.62	0.24	-2.37	0.15	4.36	0.39		-2.55	0.22	-1.18	0.26	-0.79	0.27	0.73	0.46	-2.74	0.24	-1.54	0.58	-2.5	0.15	-1.3	0.18	4.44	0.4	3.57	1.11		-1.76	0.348281	-1.91	0.528394
		aCD	cycloheptanol[0]	a-chp	-2.51	0.06	-2.99	0.23		-3.1	0.22	-4.97	0.24	-1.28	0.29	-3.1	0.18	-0.6	0.52		-0.72	0.23	-3.09	0.23	-1.28	0.28	-5.05	0.25	2.14	0.2	-1.35	0.29	-2.13	0.17	-3.12	0.18	-1.3	0.36	-0.58	0.53		0.56	0.362353	1.96	0.339706
		bCD	1-methylcyclohexanol[0]	b-mch	-4.175	0.01	-2.29	0.03		-5.93	0.18	-4.08	0.3	-1.47	0.21	-3.89	0.16	1.28	0.42		-5.19	0.22	-5.71	0.23	-4.46	0.48	-3.92	0.35	-1.76	0.39	-1.35	0.22	-4.35	0.2	-3.69	0.19	1.65	0.48	1.12	0.54		-0.73	0.528015	-1.79	0.418808
		bCD	cycloheptanol[0]	b-chp	-4.56	0.011	-2.96	0.01		-6.21	0.19	-4.8	0.28	-1.44	0.21	-4.41	0.16	1.06	0.46		-4.99	0.21	-6.12	0.22	-4.63	0.26	-4.82	0.32	-1.8	0.26	-1.38	0.23	-4.29	0.15	-4.43	0.18	1.47	0.48	0.99	0.53		-0.36	0.334215	-1.3	0.38833
		aCD	heptanoate[-1]	a-hep	-3.991	0.013	-4.19	0.09		-6.7	0.16	-7.95	0.21	-1.36	0.44	-5.25	0.14	-1.33	0.49		-6.21	0.22	-6.33	0.22	-8.41	0.28	-7.57	0.23	-3.2	0.23	0.16	0.19	-5.7	0.16	-4.89	0.13	0.49	0.4	-2.84	0.34		2.2	0.35609	1.24	0.318277
		bCD	heptanoate[-1]	b-hep	-3.394	0.179	0.42	0.04		-5.5	0.21	-2.58	0.27	0.09	0.21	-1.46	0.17	-1.21	0.45		-3.95	0.22	-5.45	0.22	-2.58	0.36	-2.58	0.3	-1.35	0.29	0.22	0.21	-1.48	0.19	-1.46	0.19	0.24	0.53	-1.34	0.48		-1.37	0.4219	-2.87	0.372022
		bCD	benzoate[-1]	b-ben	-1.64	0.024	-2.51	0.08		-4.09	0.18	-3.23	0.24	-0.6	0.31	-3.45	0.14	0.82	0.52		-3.06	0.24	-3.96	0.21	-3.45	0.35	-3.18	0.28	-1.5	0.58	-0.38	0.34	-3.29	0.15	-3.49	0.16	1.34	0.76	0.7	0.61		0.39	0.424382	-0.78	0.35
		bCD	4-methylphenylacetate[-1]	b-mp4	-2.192	0.013	-2.89	0.05		-4.82	0.19	-3.23	0.33	0.23	0.3	-2.98	0.15	-0.48	0.42		-3.74	0.23	-4.7	0.23	-4.89	0.36	-2.87	0.34	-2.17	0.29	0.75	0.23	-3.76	0.17	-2.81	0.16	1.04	0.59	-0.81	0.45		1.15	0.4272	-1.83	0.410488
		bCD	4-methoxyphenylacetate[-1]	b-mo4	-2.512	0.007	-1.96	0.01		-4.86	0.18	-4.12	0.22	0.08	0.25	-3.78	0.17	-0.43	0.4		-3.83	0.23	-4.72	0.22	-4.85	0.27	-3.95	0.24	-1.2	0.54	0.38	0.22	-4.74	0.18	-3.54	0.16	1.09	0.57	-0.79	0.43		1.02	0.354683	-0.77	0.325576
		bCD	4-phenylbutanoate[-1]	b-pb4	-3.599	0.018	-2.82	0.01		-5.83	0.19	-3.85	0.27	-0.04	0.28	-3.35	0.15	-0.45	0.44		-4.84	0.25	-5.69	0.22	-4.07	0.34	-3.79	0.32	-2.05	0.24	0.48	0.2	-3.4	0.17	-3.34	0.18	1.38	0.53	-0.93	0.47		-0.77	0.422019	-1.9	0.38833
Q4RG-TIP3P-shw		aCD	1-hexylamine[+1]	a-ham	-3.533	0.004	-4.19	0.02		-3.71	0.18	-4.91	0.31	-3.83	0.17	-5.45	0.21	4.37	0.38		-3.6	0.22	-2.58	0.22	-5.29	0.31	-2.98	0.29	-4.03	0.17	-2.78	0.22	-5.84	0.15	-3.45	0.14	4.59	0.43	3.24	0.38		1.69	0.380132	0.4	0.364005
		aCD	n-methylhexylamine[+1]	a-nmh	-3.516	0.012	-4.2	0.08		-3.55	0.2	-5.38	0.26	-4.06	0.2	-6	0.16	4.68	0.34		-3.5	0.22	-1.98	0.22	-5.6	0.25	-2.84	0.26	-4.19	0.21	-2.57	0.25	-6.19	0.14	-3.75	0.14	4.79	0.37	3.47	0.41		2.1	0.333017	0.86	0.340588
		aCD	1-methylhexylamine[+1]	a-mha	-3.604	0.004	-4.28	0.02		-3.78	0.2	-5.84	0.31	-4.23	0.23	-6.05	0.2	4.44	0.42		-3.71	0.22	-2.34	0.22	-6.12	0.31	-3.34	0.31	-4.41	0.23	-2.65	0.21	-6.33	0.17	-3.51	0.14	4.62	0.46	2.82	0.4		2.41	0.380132	1	0.380132
		aCD	1-heptylamine[+1]	a-hpa	-4.137	0.004	-4.66	0.02		-4.72	0.2	-5.93	0.27	-3.54	0.19	-5.81	0.18	3.41	0.35		-4.63	0.23	-3.49	0.23	-6.31	0.23	-3.58	0.4	-3.7	0.2	-2.54	0.18	-6.1	0.13	-3.95	0.14	3.49	0.4	2.92	0.52		1.68	0.325269	0.09	0.461411
		bCD	1-hexylamine[+1]	b-ham	-2.486	0.084	0.6	0.05		-1.88	0.22	-0.65	0.3	-2.69	0.27	-2.19	0.15	4.24	0.48		-1.78	0.25	-0.65	0.25	-0.94	0.3	1.11	0.3	-2.99	0.25	-0.91	0.19	-2.34	0.14	-1.27	0.14	4.39	0.54	3.29	0.5		-0.84	0.390512	-1.76	0.390512
		bCD	1-methylhexylamine[+1]	b-mha	-2.557	0.066	0.47	0.03		-2.12	0.23	-0.83	0.3	-2.87	0.24	-2.44	0.15	4.49	0.36		-2.05	0.25	-0.67	0.25	-1.08	0.29	1.45	0.23	-3.06	0.23	-1.16	0.33	-2.56	0.15	-1.36	0.14	4.54	0.39	3.98	0.49		-0.97	0.382884	-2.12	0.339706
		aCD	cycloheptanol[0]	a-chp	-2.51	0.06	-2.99	0.23		-3.26	0.22	-5.06	0.26	-1.49	0.17	-3.06	0.19	-0.51	0.53		-0.33	0.22	-3.25	0.22	-1.36	0.35	-5.09	0.26	2.1	0.2	-1.52	0.17	-2.14	0.21	-3.07	0.2	-1.33	0.5	-0.5	0.53		1.03	0.413401	1.84	0.340588
		bCD	1-methylcyclohexanol[0]	b-mch	-4.175	0.01	-2.29	0.03		-5.59	0.18	-3.53	0.23	-0.66	0.17	-3.66	0.12	0.78	0.33		-5.26	0.25	-5.02	0.24	-3.32	0.31	-3.84	0.27	-0.51	0.24	-0.88	0.19	-3.55	0.15	-3.82	0.15	0.73	0.44	0.86	0.46		-1.94	0.398246	-1.18	0.361248
		bCD	cycloheptanol[0]	b-chp	-4.56	0.011	-2.96	0.01		-5.94	0.2	-4.3	0.22	-1.45	0.16	-4.36	0.15	1.5	0.37		-4.88	0.24	-5.81	0.24	-4.47	0.31	-4.26	0.25	-1.8	0.24	-1.37	0.18	-4.32	0.18	-4.37	0.18	1.65	0.58	1.47	0.43		-0.41	0.392046	-1.55	0.346554
		aCD	heptanoate[-1]	a-hep	-3.991	0.013	-4.19	0.09		-6.42	0.19	-7.65	0.29	-0.44	0.29	-4.68	0.17	-2.53	0.52		-5.35	0.23	-6.3	0.23	-8.19	0.27	-7.53	0.34	-3.15	0.27	0.15	0.15	-5.66	0.16	-4.47	0.17	0.62	0.49	-3.21	0.5		2.84	0.354683	1.23	0.410488
		bCD	heptanoate[-1]	b-hep	-3.394	0.179	0.42	0.04		-4.99	0.22	-2.39	0.34	0.12	0.21	-1.2	0.19	-1.31	0.59		-3.8	0.26	-4.89	0.25	-2.81	0.37	-2.32	0.38	-1.13	0.2	0.34	0.2	-1.7	0.16	-1.11	0.22	0.02	0.47	-1.55	0.67		-0.99	0.452217	-2.57	0.454863
		bCD	benzoate[-1]	b-ben	-1.64	0.024	-2.51	0.08		-3.89	0.23	-2.81	0.29	-0.27	0.29	-3.42	0.14	0.89	0.43		-2.45	0.25	-3.83	0.25	-3.8	0.32	-2.69	0.32	-2.12	0.24	-0.07	0.3	-3.08	0.15	-3.46	0.15	1.39	0.49	0.83	0.47		1.35	0.406079	-1.14	0.406079
		bCD	4-methylphenylacetate[-1]	b-mp4	-2.192	0.013	-2.89	0.05		-4.51	0.2	-3.13	0.29	0.07	0.29	-3.11	0.18	-0.09	0.36		-3.62	0.27	-4.33	0.25	-4.34	0.28	-2.74	0.29	-1.43	0.3	0.56	0.23	-3.82	0.15	-2.88	0.18	0.91	0.41	-0.42	0.4		0.72	0.388973	-1.59	0.382884
		bCD	4-methoxyphenylacetate[-1]	b-mo4	-2.512	0.007	-1.96	0.01		-4.96	0.21	-3.97	0.29	0.26	0.27	-3.78	0.16	-0.45	0.43		-3.92	0.25	-4.83	0.25	-5.02	0.28	-3.71	0.32	-1.51	0.21	0.68	0.22	-4.57	0.14	-3.59	0.17	1.06	0.42	-0.81	0.48		1.1	0.375366	-1.12	0.406079
		bCD	4-phenylbutanoate[-1]	b-pb4	-3.599	0.018	-2.82	0.01		-5.28	0.22	-3.47	0.26	0.04	0.27	-3.42	0.14	-0.1	0.35		-4.05	0.26	-5.18	0.26	-3.99	0.26	-3.38	0.29	-2.02	0.22	0.39	0.22	-3.27	0.19	-3.44	0.16	1.3	0.51	-0.34	0.37		-0.06	0.367696	-1.8	0.389487
Q4RG-TIP3P		aCD	1-hexylamine[+1]	a-ham	-3.533	0.004	-4.19	0.02		-3.66	0.2	-5.38	0.29	-4.06	0.19	-5.78	0.18	4.47	0.38		-3.59	0.22	-2.24	0.22	-5.68	0.27	-2.68	0.3	-4.22	0.19	-2.69	0.22	-6.02	0.15	-3.69	0.16	4.55	0.42	3.7	0.47		2.09	0.348281	0.44	0.372022
(for reference)		aCD	n-methylhexylamine[+1]	a-nmh	-3.516	0.012	-4.2	0.08		-3.92	0.2	-5.78	0.33	-4.37	0.22	-5.84	0.2	4.43	0.44		-3.83	0.23	-2.66	0.21	-6.19	0.31	-3.09	0.27	-4.63	0.21	-2.66	0.25	-6.15	0.16	-3.8	0.15	4.59	0.5	3.37	0.43		2.36	0.386005	0.43	0.342053
		aCD	1-methylhexylamine[+1]	a-mha	-3.604	0.004	-4.28	0.02		-3.9	0.2	-6.36	0.29	-4.11	0.18	-5.85	0.2	3.59	0.42		-3.85	0.22	-2.41	0.23	-6.68	0.26	-3.18	0.32	-4.25	0.19	-2.75	0.21	-6.08	0.18	-3.55	0.17	3.64	0.46	3.12	0.51		2.83	0.340588	0.77	0.394081
		aCD	1-heptylamine[+1]	a-hpa	-4.137	0.004	-4.66	0.02		-4.25	0.18	-5.58	0.32	-3.44	0.21	-5.57	0.26	3.43	0.4		-4.08	0.23	-3.36	0.23	-6.13	0.29	-3.86	0.32	-3.75	0.21	-2.46	0.2	-6.13	0.16	-3.82	0.16	3.75	0.48	2.42	0.43		2.05	0.370135	0.5	0.394081
		bCD	1-hexylamine[+1]	b-ham	-2.486	0.084	0.6	0.05		-2.76	0.2	-0.88	0.25	-3.14	0.21	-2.25	0.14	4.51	0.42		-2.72	0.22	-1.11	0.22	-0.99	0.26	0.73	0.29	-3.29	0.2	-1.04	0.29	-2.32	0.15	-1.23	0.16	4.62	0.44	3	0.51		-1.73	0.340588	-1.84	0.364005
		bCD	1-methylhexylamine[+1]	b-mha	-2.557	0.066	0.47	0.03		-2.49	0.19	-0.36	0.3	-2.52	0.17	-2.37	0.16	4.52	0.44		-2.41	0.21	-1.21	0.21	-0.6	0.31	1.23	0.39	-2.66	0.18	-1.6	0.3	-2.5	0.17	-1.45	0.19	4.56	0.49	4.28	0.65		-1.81	0.374433	-2.44	0.442945
		aCD	cycloheptanol[0]	a-chp	-2.51	0.06	-2.99	0.23		-3.09	0.21	-4.96	0.27	-1.14	0.21	-3.27	0.13	-0.55	0.34		-0.27	0.23	-3.08	0.21	-1.5	0.31	-5	0.28	2.07	0.16	-1.18	0.21	-2.37	0.19	-3.28	0.13	-1.2	0.55	-0.54	0.34		1.23	0.386005	1.92	0.35
		bCD	1-methylcyclohexanol[0]	b-mch	-4.175	0.01	-2.29	0.03		-6.29	0.16	-3.53	0.27	-0.58	0.2	-3.61	0.12	0.66	0.42		-5.98	0.22	-5.71	0.21	-3.38	0.37	-3.78	0.3	-0.56	0.29	-0.61	0.2	-3.58	0.17	-3.67	0.15	0.76	0.61	0.5	0.45		-2.6	0.430465	-1.93	0.366197
		bCD	cycloheptanol[0]	b-chp	-4.56	0.011	-2.96	0.01		-6.31	0.17	-4.51	0.29	-1.24	0.2	-4.31	0.15	1.05	0.47		-5.65	0.23	-6.04	0.22	-4.09	0.35	-4.73	0.37	-1.32	0.26	-1.2	0.26	-4.38	0.18	-4.27	0.2	1.61	0.53	0.74	0.63		-1.56	0.418808	-1.31	0.430465
		aCD	heptanoate[-1]	a-hep	-3.991	0.013	-4.19	0.09		-6.85	0.2	-7.29	0.27	-0.25	0.23	-4.88	0.15	-2.17	0.4		-5.43	0.23	-6.78	0.22	-8.29	0.28	-7.18	0.29	-3.19	0.2	0.09	0.17	-5.76	0.16	-4.77	0.16	0.67	0.45	-2.49	0.41		2.86	0.362353	0.4	0.364005
		bCD	heptanoate[-1]	b-hep	-3.394	0.179	0.42	0.04		-5.27	0.2	-2.28	0.35	-0.09	0.22	-1.44	0.17	-0.75	0.52		-3.8	0.22	-5.21	0.22	-2.72	0.3	-2.24	0.38	-1.21	0.21	0.02	0.24	-1.46	0.17	-1.44	0.19	-0.04	0.48	-0.82	0.57		-1.08	0.372022	-2.97	0.43909
		bCD	benzoate[-1]	b-ben	-1.64	0.024	-2.51	0.08		-3.84	0.19	-2.73	0.26	-0.42	0.22	-3.44	0.19	1.13	0.48		-2.69	0.21	-3.73	0.23	-3.74	0.35	-2.54	0.29	-2.11	0.28	-0.1	0.19	-3.23	0.16	-3.47	0.22	1.61	0.6	1.04	0.56		1.05	0.408167	-1.19	0.370135
		bCD	4-methylphenylacetate[-1]	b-mp4	-2.192	0.013	-2.89	0.05		-4.66	0.17	-3.14	0.29	0.03	0.3	-3.15	0.18	-0.02	0.44		-3.91	0.24	-4.44	0.22	-4.09	0.43	-2.73	0.29	-1.3	0.55	0.61	0.18	-3.97	0.18	-2.8	0.15	1.17	0.7	-0.54	0.47		0.18	0.492443	-1.71	0.364005
		bCD	4-methoxyphenylacetate[-1]	b-mo4	-2.512	0.007	-1.96	0.01		-5.56	0.2	-3.92	0.28	0.49	0.2	-3.35	0.18	-1.07	0.48		-3.85	0.23	-5.52	0.22	-5.52	0.3	-3.81	0.29	-1.54	0.3	0.63	0.19	-4.46	0.18	-3.27	0.18	0.48	0.57	-1.17	0.5		1.67	0.378021	-1.71	0.364005
		bCD	4-phenylbutanoate[-1]	b-pb4	-3.599	0.018	-2.82	0.01		-5.55	0.19	-3.5	0.28	0.05	0.26	-3.39	0.13	-0.17	0.43		-4.4	0.24	-5.44	0.22	-3.52	0.52	-3.5	0.31	-0.77	0.81	0.21	0.24	-3.57	0.21	-3.35	0.15	0.83	0.68	-0.36	0.48		-0.88	0.572713	-1.94	0.380132
Line of Identity					-99					-99
					99					99																																					dG RMSD to Q4RG-TIP3P
																																															sm1	sm2	sm3
																																															0.04	0.0676	0.0081
																																															0.0225	0.0009	0.0361
Column Heading Abbreviations																																															0.0009	0.0049	0.0256
Host: aCD = αCD, bCD = βCD																																															0.0441	0.36	0.2025
GuestName: guest[charge]																																															0.1681	0.2704	0.0441
HG-ID: host-guest ID abbreviation																																															0.0169	0.04	0.0144
dG: ΔG_binding, combined orientation																																															0.0081	0.0625	0.0001
dH: ΔH_binding, combined orientation																																															0.25	0.2209	0.1296
Val: Valence energy; includes bonds, angles dihedrals,																																															0.0729	0.0784	0.01
and 1-4 terms																																															0.1444	0.0121	0.0225
LJ: Lennard-Jones energy																																															0.0225	0.0676	0.0529
Ele: Electrostatic energy																																															0.1369	0.0009	0.0625
SEM: Standard Error of the Mean; each SEM column is																																															0.0784	0.0004	0.0256
associated with the mean values immediately at left.																																															0.6889	0.0004	0.49
-p suffix: value for the primary orientation only																																															0.0361	0.1521	0.0784
-s suffix: value for the secondary orientation only																																															0.339676	0.298786	0.283125
-TdS-p: -TΔS; the entropic component of the binding free
energy for the primary orientation																																															dG R^2 to Q4RG-TIP3P
-TdS-s: -TΔS; the entropic component of the binding free																																															sm1	sm2	sm3
energy for the secondary orientation																																															0.959037	0.952076	0.95393
[truncated: 5 more columns]

## Sheet: S6 Q4RG-TIP4Pew
Table S6. Complete experimental and calculated thermodynamic values (kcal/mol) for the Q4RG-TIP4Pew data set. (See below for explanation of the columns.)
				Experiment					Calculated											Calculated (Decomposed by Orientation)																					Entropic Contribution
	Host	GuestName	HG-ID	dG	SEM	dH	SEM		dG	SEM	dH	SEM	Val	SEM	LJ	SEM	Ele	SEM		dG-p	SEM	dG-s	SEM	dH-p	SEM	dH-s	SEM	Val-p	SEM	Val-s	SEM	LJ-p	SEM	LJ-s	SEM	Ele-p	SEM	Ele-s	SEM		-TdS-p	SEM	-TdS-s	SEM
	aCD	1-butylamine[+1]	a-bam	-1.575	0.019	-2.17	0.05		-1.54	0.22	-1.71	0.28	-4.85	0.21	-4.1	0.23	7.24	0.48		-1.51	0.23	0.33	0.23	-1.86	0.29	1.13	0.32	-4.98	0.2	-2.15	0.23	-4.21	0.23	-2	0.25	7.34	0.5	5.28	0.57		0.35	0.370135	-0.8	0.394081
	aCD	n-methylbutylamine[+1]	a-nmb	-1.685	0.018	-2.57	0.06		-1.35	0.22	-1.99	0.3	-5.22	0.27	-4.85	0.25	8.09	0.5		-1.29	0.24	0.11	0.24	-2.28	0.29	0.76	0.27	-5.51	0.25	-2.53	0.29	-5.14	0.22	-2.2	0.22	8.37	0.53	5.49	0.49		0.99	0.376431	-0.65	0.361248
	aCD	1-methylbutylamine[+1]	a-mba	-1.764	0.02	-2.68	0.07		-1.24	0.23	-2.26	0.26	-3.99	0.23	-3.66	0.2	5.39	0.41		-1.19	0.25	0.43	0.24	-2.49	0.24	0.79	0.35	-4.14	0.23	-1.87	0.25	-3.83	0.18	-1.38	0.23	5.49	0.43	4.04	0.69		1.3	0.346554	-0.36	0.424382
	aCD	1-pentylamine[+1]	a-pam	-2.72	0.004	-3.28	0.02		-2.48	0.22	-3.1	0.33	-4.59	0.27	-4.39	0.24	5.87	0.39		-2.4	0.24	-1.13	0.25	-3.56	0.26	0.37	0.29	-4.91	0.24	-2.17	0.27	-4.7	0.2	-2.01	0.23	6.05	0.42	4.55	0.66		1.16	0.353836	-1.5	0.382884
	aCD	1-hexylamine[+1]	a-ham	-3.533	0.004	-4.19	0.02		-3.42	0.19	-3.77	0.49	-4.23	0.22	-4.97	0.27	5.43	0.52		-3.3	0.23	-2.36	0.23	-4.53	0.42	-0.41	0.23	-4.54	0.2	-2.86	0.24	-5.45	0.19	-2.87	0.18	5.46	0.63	5.32	0.42		1.23	0.478853	-1.95	0.325269
	aCD	n-methylhexylamine[+1]	a-nmh	-3.516	0.012	-4.2	0.08		-4.11	0.23	-4.04	0.27	-4.56	0.18	-5.59	0.18	6.11	0.4		-4.09	0.23	-2.09	0.24	-4.17	0.27	-0.62	0.26	-4.63	0.19	-2.8	0.21	-5.69	0.17	-3.14	0.22	6.14	0.41	5.31	0.5		0.08	0.354683	-1.47	0.353836
	aCD	1-methylhexylamine[+1]	a-mha	-3.604	0.004	-4.28	0.02		-4.43	0.23	-4.98	0.25	-4.9	0.26	-5.74	0.2	5.66	0.43		-4.42	0.24	-1.96	0.25	-5.06	0.25	-0.43	0.27	-4.94	0.26	-2.8	0.25	-5.79	0.2	-3.05	0.23	5.66	0.43	5.41	0.45		0.64	0.346554	-1.53	0.367967
	aCD	1-heptylamine[+1]	a-hpa	-4.137	0.004	-4.66	0.02		-4.79	0.2	-4.4	0.38	-3.97	0.22	-5.04	0.26	4.61	0.47		-4.68	0.24	-3.66	0.24	-4.99	0.3	-1.44	0.4	-4.16	0.23	-3.05	0.23	-5.38	0.24	-3.33	0.28	4.54	0.54	4.94	0.7		0.31	0.384187	-2.22	0.466476
	aCD	1-methylheptylamine[+1]	a-mhp	-4.166	0.004	-4.74	0.02		-5.42	0.25	-5.43	0.31	-4.9	0.22	-5.7	0.21	5.17	0.52		-5.38	0.26	-3.63	0.28	-5.65	0.3	-1.87	0.3	-5.03	0.21	-2.77	0.19	-5.86	0.2	-3.12	0.21	5.24	0.55	4.01	0.45		0.27	0.396989	-1.76	0.410366
	aCD	1-octylamine[+1]	a-oam	-4.606	0.007	-5.46	0.03		-5.49	0.22	-4.65	0.27	-3.66	0.19	-5.08	0.24	4.09	0.38		-5.44	0.24	-3.88	0.24	-4.89	0.26	-1.85	0.28	-3.75	0.2	-2.65	0.2	-5.18	0.26	-3.86	0.17	4.04	0.41	4.66	0.44		-0.55	0.353836	-2.03	0.368782
	bCD	1-hexylamine[+1]	b-ham	-2.486	0.084	0.6	0.05		-2.47	0.21	0.58	0.32	-2.97	0.43	-1.82	0.23	5.38	0.78		-2.43	0.22	-0.81	0.23	0.39	0.32	3.23	0.3	-3.1	0.46	-1.24	0.44	-1.89	0.24	-0.96	0.23	5.37	0.84	5.43	0.77		-2.82	0.38833	-4.04	0.378021
	bCD	1-methylhexylamine[+1]	b-mha	-2.557	0.066	0.47	0.03		-2.53	0.23	0.75	0.45	-3.01	0.23	-1.7	0.31	5.46	0.86		-2.47	0.25	-0.99	0.24	0.54	0.47	2.99	0.38	-3.19	0.23	-1.12	0.31	-1.82	0.33	-0.37	0.29	5.56	0.93	4.48	0.83		-3.01	0.532353	-3.98	0.449444
	bCD	1-octylamine[+1]	b-oam	-3.585	0.12	-0.48	0.03		-4.12	0.17	0.41	0.4	-2.44	0.18	-0.95	0.18	3.8	0.47		-3.89	0.22	-3.4	0.23	-0.42	0.33	2.23	0.44	-2.59	0.23	-2.13	0.24	-1.07	0.21	-0.68	0.3	3.24	0.49	5.04	0.76		-3.47	0.396611	-5.63	0.496488
	aCD	cyclobutanol[0]	a-cbu	-2.022	0.016	-2.75	0.05		-2.47	0.22	-1.23	0.3	-1.89	0.18	-2.9	0.18	3.56	0.5		-1.19	0.23	-2.38	0.25	-0.86	0.27	-1.29	0.33	-1.74	0.25	-1.92	0.21	-3.42	0.2	-2.83	0.2	4.29	0.5	3.45	0.57		-0.33	0.354683	-1.09	0.414005
	aCD	cyclopentanol[0]	a-cpe	-2.13	0.016	-2.74	0.02		-3.04	0.27	-1.68	0.23	-1.8	0.27	-3.27	0.22	3.39	0.43		-2.45	0.51	-2.66	0.24	-1.76	0.23	-1.63	0.34	-1.49	0.19	-2.03	0.38	-3.25	0.22	-3.29	0.32	2.97	0.48	3.7	0.55		-0.69	0.559464	-1.03	0.416173
	aCD	cycloheptanol[0]	a-chp	-2.51	0.06	-2.99	0.23		-3.37	0.25	-3.41	0.23	-2.08	0.2	-2.23	0.21	0.9	0.4		-0.55	0.23	-3.36	0.25	-0.07	0.34	-3.44	0.23	1.68	0.22	-2.11	0.2	-1.07	0.32	-2.24	0.21	-0.69	0.66	0.92	0.41		-0.48	0.410488	0.08	0.339706
	aCD	cyclooctanol[0]	a-coc	-3.227	1.135	-0.93	0.32		-3.27	0.25	-2.91	0.37	-1.71	0.3	-2.03	0.19	0.83	0.52		-0.73	0.26	-3.26	0.26	0.55	0.34	-2.97	0.37	2.07	0.24	-1.78	0.3	-0.83	0.25	-2.05	0.19	-0.69	0.55	0.86	0.53		-1.28	0.428019	-0.29	0.452217
	bCD	cyclobutanol[0]	b-cbu	-1.554	0.167	0.88	0.17		-2.75	0.19	1.03	0.26	-1.48	0.21	-1.21	0.19	3.73	0.47		-1.97	0.23	-2.54	0.25	0.72	0.29	1.16	0.33	-1.7	0.31	-1.39	0.25	-1.45	0.26	-1.12	0.23	3.87	0.62	3.67	0.6		-2.69	0.370135	-3.7	0.414005
	bCD	cyclopentanol[0]	b-cpe	-3.05	0.01	-1.09	0.01		-4.48	0.16	-0.64	0.25	-1.8	0.18	-3.06	0.26	4.22	0.54		-3.91	0.23	-4.17	0.22	-0.59	0.38	-0.67	0.32	-1.99	0.24	-1.67	0.24	-3.21	0.29	-2.96	0.37	4.61	0.76	3.96	0.69		-3.32	0.444185	-3.5	0.38833
	bCD	1-methylcyclohexanol[0]	b-mch	-4.175	0.01	-2.29	0.03		-5.72	0.17	-1.67	0.24	-1.66	0.23	-3.44	0.19	3.43	0.44		-5.37	0.23	-5.18	0.24	-1.74	0.3	-1.57	0.37	-1.48	0.31	-1.89	0.29	-3.52	0.2	-3.34	0.32	3.26	0.5	3.66	0.72		-3.63	0.378021	-3.61	0.441022
	bCD	cis-4-methylcyclohexanol[0]	b-m4c	-4.319	0.006	-2.27	0.01		-5.49	0.17	-1.14	0.32	-1.85	0.27	-3.55	0.19	4.26	0.54		-4.96	0.24	-5.14	0.23	-1.59	0.42	-0.79	0.42	-2.51	0.36	-1.35	0.25	-3.76	0.3	-3.39	0.22	4.67	0.83	3.94	0.65		-3.37	0.483735	-4.35	0.478853
	bCD	trans-4-methylcyclohexanol[0]	b-m4t	-4.541	0.008	-2.17	0.02		-6.27	0.18	-1.4	0.28	-1.52	0.3	-2.73	0.21	2.85	0.57		-5.51	0.23	-6.05	0.23	-1.15	0.39	-1.51	0.35	-1.77	0.26	-1.42	0.4	-2.81	0.32	-2.69	0.25	3.44	0.76	2.6	0.72		-4.36	0.452769	-4.54	0.418808
	bCD	cycloheptanol[0]	b-chp	-4.56	0.011	-2.96	0.01		-6.57	0.18	-2.16	0.29	-1.75	0.24	-3.82	0.22	3.42	0.61		-5.75	0.23	-6.38	0.23	-1.98	0.37	-2.22	0.36	-1.66	0.27	-1.78	0.31	-3.78	0.22	-3.84	0.28	3.46	0.69	3.4	0.78		-3.77	0.43566	-4.16	0.4272
	bCD	cyclooctanol[0]	b-coc	-4.971	0.036	-3.92	0.06		-6.32	0.2	-2.68	0.34	-1.55	0.25	-4.31	0.23	3.18	0.62		-5.48	0.25	-6.13	0.25	-2.49	0.37	-2.75	0.44	-2.33	0.37	-1.26	0.26	-4.67	0.23	-4.18	0.29	4.51	0.7	2.7	0.74		-2.99	0.446542	-3.38	0.506063
	aCD	butanoate[-1]	a-but	-1.506	0.036	-2.53	0.12		-4.08	0.23	-3.13	0.28	-0.77	0.25	-3.08	0.18	0.72	0.41		-1.72	0.26	-4.06	0.24	-2.08	0.33	-3.15	0.29	-2.83	0.47	-0.72	0.25	-4.79	0.28	-3.04	0.18	5.54	0.58	0.61	0.41		0.36	0.420119	-0.91	0.376431
	aCD	pentanoate[-1]	a-pnt	-2.596	0.005	-2.75	0.01		-4.77	0.22	-3.83	0.28	-1.53	0.26	-3.09	0.2	0.79	0.57		-3.2	0.25	-4.71	0.24	-3.84	0.34	-3.83	0.31	-3.24	0.27	-1.38	0.26	-4.92	0.16	-2.93	0.2	4.32	0.53	0.48	0.59		0.64	0.422019	-0.88	0.392046
	aCD	hexanoate[-1]	a-hex	-3.38	0.005	-3.4	0.02		-5.74	0.21	-4.2	0.26	-0.85	0.18	-3.93	0.23	0.58	0.49		-4.24	0.24	-5.68	0.23	-4.36	0.27	-4.19	0.28	-2.07	0.32	-0.73	0.18	-4.48	0.2	-3.88	0.25	2.2	0.56	0.41	0.52		0.12	0.361248	-1.49	0.362353
	aCD	trans-2-hexenoate[-1]	a-hx2	-3.344	0.01	-4.12	0.06		-5.74	0.22	-4.27	0.24	-1.41	0.19	-3.16	0.19	0.3	0.41		-4.39	0.24	-5.67	0.24	-4.49	0.24	-4.24	0.27	-1.6	0.19	-1.38	0.21	-4.36	0.18	-3	0.19	1.47	0.43	0.14	0.45		0.1	0.339411	-1.43	0.361248
	aCD	trans-3-hexenoate[-1]	a-hx3	-3.011	0.01	-3.36	0.05		-4.53	0.21	-4.1	0.26	-0.36	0.23	-2.88	0.18	-0.87	0.4		-3.27	0.25	-4.44	0.24	-4.31	0.3	-4.07	0.3	0.8	0.3	-0.54	0.24	-4.02	0.21	-2.7	0.17	-1.1	0.53	-0.83	0.45		1.04	0.390512	-0.37	0.384187
	aCD	heptanoate[-1]	a-hep	-3.991	0.013	-4.19	0.09		-6.83	0.21	-5.15	0.24	-0.72	0.23	-3.92	0.16	-0.51	0.43		-5.6	0.24	-6.73	0.24	-4.7	0.26	-5.23	0.27	-1.1	0.23	-0.66	0.26	-4.28	0.19	-3.86	0.18	0.68	0.47	-0.71	0.48		-0.9	0.353836	-1.5	0.361248
	aCD	6-heptenoate[-1]	a-hp6	-3.597	0.004	-4.48	0.02		-5.62	0.22	-4.25	0.23	-0.52	0.22	-4.22	0.19	0.49	0.43		-4.15	0.24	-5.56	0.24	-4.02	0.35	-4.27	0.25	-2.82	0.24	-0.28	0.2	-5.5	0.18	-4.09	0.19	4.29	0.48	0.09	0.41		-0.13	0.424382	-1.29	0.346554
	aCD	octanoate[-1]	a-oct	-4.622	0.017	-4.89	0.03		-7.43	0.21	-5.69	0.25	-0.51	0.17	-4.13	0.2	-1.05	0.39		-6.21	0.23	-7.33	0.24	-5.06	0.26	-5.8	0.28	-1.51	0.2	-0.34	0.16	-4.23	0.16	-4.11	0.23	0.68	0.41	-1.34	0.41		-1.15	0.347131	-1.53	0.368782
	bCD	pentanoate[-1]	b-pnt	-1.267	0.323	1.89	0.53		-3.15	0.21	0.72	0.28	0.14	0.27	-0.7	0.25	1.29	0.61		-1.69	0.25	-3.09	0.23	0.68	0.58	0.73	0.3	-0.03	0.63	0.15	0.29	-1.29	0.25	-0.64	0.28	2	1.29	1.21	0.66		-2.37	0.631585	-3.82	0.378021
	bCD	hexanoate[-1]	b-hex	-2.28	0.03	1.31	0.04		-4.06	0.21	0.8	0.41	-0.67	0.28	-1.02	0.27	2.49	0.81		-2.54	0.24	-4	0.23	0.91	0.45	0.79	0.44	-1.05	0.28	-0.64	0.31	-0.65	0.3	-1.05	0.29	2.61	0.88	2.48	0.89		-3.45	0.51	-4.79	0.496488
	bCD	heptanoate[-1]	b-hep	-3.394	0.179	0.42	0.04		-4.98	0.22	0.12	0.38	-0.08	0.27	-0.73	0.25	0.94	0.66		-3.34	0.23	-4.93	0.23	0.46	0.53	0.09	0.41	-0.18	0.34	-0.08	0.29	-0.77	0.31	-0.73	0.27	1.42	1.03	0.9	0.7		-3.8	0.577754	-5.02	0.470106
	bCD	benzoate[-1]	b-ben	-1.64	0.024	-2.51	0.08		-3.52	0.23	-1.36	0.29	-0.59	0.32	-2.96	0.21	2.19	0.55		-1.73	0.25	-3.48	0.24	-1.4	0.41	-1.35	0.31	-0.19	0.56	-0.61	0.34	-2.58	0.25	-2.98	0.22	1.37	0.96	2.24	0.58		-0.33	0.480208	-2.13	0.392046
	bCD	phenylacetate[-1]	b-pha	-1.697	0.048	-1.79	0.11		-4.04	0.22	-0.93	0.31	-1.17	0.38	-3.48	0.22	3.71	0.57		-2.64	0.24	-3.97	0.25	-1.21	0.36	-0.9	0.34	-1.05	0.25	-1.18	0.42	-3.77	0.19	-3.44	0.24	3.61	0.61	3.72	0.63		-1.43	0.432666	-3.07	0.422019
	bCD	3-methylphenylacetate[-1]	b-mp3	-1.458	0.036	-2.75	0.13		-4.4	0.22	-1.48	0.4	-0.11	0.19	-3.19	0.23	1.82	0.61		-2.77	0.25	-4.36	0.24	-0.56	0.41	-1.55	0.43	-0.48	0.33	-0.08	0.2	-3.12	0.31	-3.2	0.25	3.04	0.83	1.73	0.65		-2.21	0.480208	-2.81	0.492443
	bCD	4-methylphenylacetate[-1]	b-mp4	-2.192	0.013	-2.89	0.05		-4.71	0.23	-1.28	0.35	0.14	0.25	-1.79	0.26	0.37	0.65		-3.06	0.25	-4.66	0.24	-1.54	0.3	-1.26	0.38	-0.74	0.31	0.21	0.26	-2.76	0.2	-1.71	0.27	1.96	0.62	0.25	0.69		-1.52	0.390512	-3.4	0.449444
	bCD	3-methoxyphenylacetate[-1]	b-mo3	-2.156	0.01	-2.93	0.03		-4.42	0.24	-2.52	0.39	0.19	0.28	-3.55	0.25	0.85	0.76		-3.06	0.27	-4.34	0.27	-2.61	0.42	-2.5	0.44	-0.91	0.3	0.33	0.3	-3.46	0.26	-3.56	0.28	1.76	0.81	0.73	0.84		-0.45	0.4993	-1.84	0.516236
	bCD	4-methoxyphenylacetate[-1]	b-mo4	-2.512	0.007	-1.96	0.01		-5.21	0.22	-2.45	0.29	0.13	0.26	-2.57	0.2	0	0.52		-3.59	0.23	-5.16	0.24	-2.52	0.32	-2.44	0.31	-0.46	0.28	0.18	0.27	-2.89	0.23	-2.55	0.21	0.84	0.55	-0.07	0.56		-1.07	0.394081	-2.72	0.392046
	bCD	3-phenylbutanoate[-1]	b-pb3	-3.518	0.007	-2.25	0.01		-4.78	0.27	-0.9	0.32	-5.29	0.24	-2.86	0.24	7.25	0.56		-3.1	0.25	-4.73	0.29	-0.83	0.37	-0.91	0.34	-6.65	0.33	-5.18	0.24	-2.92	0.24	-2.86	0.26	8.74	0.67	7.13	0.6		-2.27	0.446542	-3.82	0.446878
	bCD	4-phenylbutanoate[-1]	b-pb4	-3.599	0.018	-2.82	0.01		-5.82	0.23	-1.58	0.35	-0.41	0.21	-2.24	0.19	1.07	0.57		-4.24	0.24	-5.76	0.25	-1.37	0.38	-1.6	0.38	-1.69	0.28	-0.29	0.21	-2.75	0.3	-2.2	0.2	3.06	0.71	0.89	0.61		-2.87	0.449444	-4.16	0.454863
Column Heading Abbreviations
Host: aCD = αCD, bCD = βCD
GuestName: guest[charge]
HG-ID: host-guest ID abbreviation
dG: ΔG_binding, combined orientation
dH: ΔH_binding, combined orientation
Val: Valence energy; includes bonds, angles dihedrals,
and 1-4 terms
LJ: Lennard-Jones energy
Ele: Electrostatic energy
SEM: Standard Error of the Mean; each SEM column is
associated with the mean values immediately at left.
-p suffix: value for the primary orientation only
-s suffix: value for the secondary orientation only
-TdS-p: -TΔS; the entropic component of the binding free
energy for the primary orientation
-TdS-s: -TΔS; the entropic component of the binding free
energy for the secondary orientation

## Sheet: S7 Q4RG-SPC
Table S7. Complete experimental and calculated thermodynamic values (kcal/mol) for the Q4RG-SPC data set. (See below for explanation of the columns.)
				Experiment					Calculated											Calculated (Decomposed by Orientation)																					Entropic Contribution
	Host	GuestName	HG-ID	dG	SEM	dH	SEM		dG	SEM	dH	SEM	Val	SEM	LJ	SEM	Ele	SEM		dG-p	SEM	dG-s	SEM	dH-p	SEM	dH-s	SEM	Val-p	SEM	Val-s	SEM	LJ-p	SEM	LJ-s	SEM	Ele-p	SEM	Ele-s	SEM		-TdS-p	SEM	-TdS-s	SEM
	aCD	1-butylamine[+1]	a-bam	-1.575	0.019	-2.17	0.05		-0.64	0.19	-0.75	0.3	-4	0.33	-3.58	0.29	6.83	0.45		-0.47	0.23	0.25	0.25	-1.23	0.28	0.73	0.26	-4.57	0.29	-2.25	0.22	-4.15	0.21	-1.82	0.21	7.49	0.44	4.81	0.45		0.76	0.362353	-0.48	0.360694
	aCD	n-methylbutylamine[+1]	a-nmb	-1.685	0.018	-2.57	0.06		-1.24	0.22	-2.2	0.28	-5.15	0.28	-4.83	0.27	7.79	0.49		-1.17	0.24	0.1	0.23	-2.54	0.25	0.39	0.27	-5.55	0.22	-2.12	0.24	-5.18	0.23	-2.21	0.2	8.19	0.5	4.72	0.44		1.37	0.346554	-0.29	0.354683
	aCD	1-methylbutylamine[+1]	a-mba	-1.764	0.02	-2.68	0.07		-0.69	0.22	-1.14	0.3	-3.62	0.36	-3.52	0.26	6	0.45		-0.61	0.25	0.64	0.28	-1.44	0.28	0.98	0.3	-3.87	0.37	-1.88	0.39	-3.77	0.25	-1.69	0.21	6.2	0.48	4.56	0.74		0.83	0.375366	-0.34	0.410366
	aCD	1-pentylamine[+1]	a-pam	-2.72	0.004	-3.28	0.02		-1.69	0.21	-2.16	0.35	-4.49	0.37	-4.68	0.33	7.01	0.41		-1.55	0.25	-0.68	0.25	-2.76	0.25	0.21	0.37	-4.9	0.39	-2.86	0.19	-5.31	0.18	-2.23	0.27	7.45	0.42	5.3	0.53		1.21	0.353553	-0.89	0.446542
	aCD	1-hexylamine[+1]	a-ham	-3.533	0.004	-4.19	0.02		-3.55	0.2	-3.66	0.35	-3.99	0.22	-4.75	0.27	5.09	0.39		-3.43	0.23	-2.47	0.24	-4.16	0.3	-1.36	0.43	-4.23	0.23	-2.93	0.22	-5.24	0.18	-2.56	0.22	5.3	0.43	4.12	0.65		0.73	0.378021	-1.11	0.492443
	aCD	n-methylhexylamine[+1]	a-nmh	-3.516	0.012	-4.2	0.08		-3.87	0.23	-4.31	0.31	-4.63	0.21	-5.58	0.22	5.91	0.44		-3.84	0.24	-2.02	0.24	-4.49	0.3	-0.92	0.27	-4.75	0.21	-2.46	0.2	-5.71	0.22	-3.27	0.18	5.97	0.46	4.81	0.43		0.65	0.384187	-1.1	0.361248
	aCD	1-methylhexylamine[+1]	a-mha	-3.604	0.004	-4.28	0.02		-3.97	0.22	-4.57	0.42	-4.42	0.22	-5.49	0.26	5.34	0.47		-3.9	0.24	-2.63	0.26	-5.05	0.37	-0.99	0.32	-4.66	0.2	-2.68	0.23	-5.83	0.2	-2.95	0.22	5.44	0.52	4.64	0.56		1.15	0.441022	-1.64	0.412311
	aCD	1-heptylamine[+1]	a-hpa	-4.137	0.004	-4.66	0.02		-4.6	0.21	-4.41	0.36	-3.93	0.23	-5.12	0.26	4.64	0.32		-4.48	0.24	-3.48	0.3	-4.95	0.26	-1.82	0.28	-4.21	0.21	-2.59	0.21	-5.52	0.18	-3.18	0.16	4.79	0.37	3.94	0.4		0.47	0.353836	-1.66	0.410366
	aCD	1-methylheptylamine[+1]	a-mhp	-4.166	0.004	-4.74	0.02		-4.95	0.24	-5.49	0.37	-4.88	0.24	-5.74	0.22	5.13	0.53		-4.9	0.26	-3.37	0.25	-5.82	0.35	-1.82	0.32	-5.1	0.22	-2.41	0.2	-5.93	0.21	-3.54	0.21	5.21	0.57	4.13	0.49		0.92	0.436005	-1.55	0.406079
	aCD	1-octylamine[+1]	a-oam	-4.606	0.007	-5.46	0.03		-5.35	0.21	-4.85	0.31	-3.43	0.17	-5.32	0.24	3.9	0.44		-5.27	0.24	-4.05	0.25	-5.2	0.28	-2.45	0.36	-3.56	0.18	-2.56	0.25	-5.53	0.24	-3.9	0.25	3.88	0.49	4	0.65		-0.07	0.368782	-1.6	0.438292
	bCD	1-hexylamine[+1]	b-ham	-2.486	0.084	0.6	0.05		-1.81	0.19	1.7	0.35	-3.21	0.33	-1.71	0.2	6.62	0.57		-1.63	0.25	-0.97	0.23	1.16	0.36	3.19	0.29	-3.67	0.32	-1.94	0.46	-2	0.21	-0.91	0.19	6.82	0.71	6.04	0.66		-2.79	0.438292	-4.16	0.370135
	bCD	1-methylhexylamine[+1]	b-mha	-2.557	0.066	0.47	0.03		-2.13	0.2	0.8	0.41	-2.9	0.35	-1.52	0.21	5.22	0.66		-2.01	0.24	-1.05	0.26	0.76	0.37	0.99	1.33	-3.35	0.3	-0.86	0.58	-1.77	0.2	-0.37	0.23	5.88	0.51	2.22	2.01		-2.77	0.441022	-2.04	1.35518
	bCD	1-octylamine[+1]	b-oam	-3.585	0.12	-0.48	0.03		-3.97	0.2	0.02	0.34	-2.22	0.18	-1	0.2	3.25	0.47		-3.84	0.24	-2.93	0.24	-0.44	0.31	1.99	0.32	-2.36	0.21	-1.66	0.22	-1.15	0.22	-0.4	0.25	3.06	0.55	4.05	0.55		-3.4	0.392046	-4.92	0.4
	aCD	cyclobutanol[0]	a-cbu	-2.022	0.016	-2.75	0.05		-2.74	0.23	-1.96	0.28	-2.08	0.19	-2.54	0.23	2.65	0.51		-0.93	0.23	-2.71	0.24	-1.04	0.23	-2.02	0.29	-0.93	0.31	-2.14	0.19	-2.8	0.24	-2.52	0.24	2.69	0.49	2.64	0.54		0.11	0.325269	-0.69	0.376431
	aCD	cyclopentanol[0]	a-cpe	-2.13	0.016	-2.74	0.02		-3.39	0.4	-2.44	0.22	-1.76	0.19	-2.87	0.14	2.19	0.33		-3.06	0.61	-2.7	0.23	-2.55	0.27	-2.26	0.27	-1.8	0.23	-1.69	0.24	-2.82	0.18	-2.94	0.17	2.08	0.41	2.36	0.41		-0.51	0.667083	-0.44	0.354683
	aCD	cycloheptanol[0]	a-chp	-2.51	0.06	-2.99	0.23		-3.42	0.25	-3.54	0.32	-1.5	0.23	-2.48	0.2	0.44	0.46		-0.41	0.24	-3.42	0.25	-0.49	0.29	-3.56	0.33	1.85	0.19	-1.53	0.24	-1.47	0.18	-2.48	0.2	-0.87	0.45	0.45	0.46		0.08	0.376431	0.14	0.414005
	aCD	cyclooctanol[0]	a-coc	-3.227	1.135	-0.93	0.32		-3.23	0.25	-3.59	0.32	-1.24	0.27	-2.14	0.19	-0.22	0.46		-0.66	0.28	-3.22	0.26	0.16	0.28	-3.65	0.33	2.36	0.24	-1.29	0.28	-0.72	0.19	-2.16	0.19	-1.48	0.48	-0.2	0.46		-0.82	0.39598	0.43	0.420119
	bCD	cyclobutanol[0]	b-cbu	-1.554	0.167	0.88	0.17		-2.23	0.18	1.04	0.26	-1.17	0.22	-1.33	0.18	3.54	0.47		-1.65	0.24	-1.92	0.25	0.72	0.35	1.24	0.33	-1.26	0.22	-1.12	0.33	-1.62	0.21	-1.13	0.23	3.6	0.53	3.49	0.67		-2.37	0.424382	-3.16	0.414005
	bCD	cyclopentanol[0]	b-cpe	-3.05	0.01	-1.09	0.01		-4.13	0.18	-0.54	0.24	-2.22	0.22	-3.11	0.15	4.79	0.46		-3.4	0.24	-3.89	0.24	-0.51	0.35	-0.56	0.3	-2.04	0.29	-2.3	0.29	-3.33	0.21	-3.01	0.19	4.85	0.68	4.76	0.58		-2.89	0.424382	-3.33	0.384187
	bCD	1-methylcyclohexanol[0]	b-mch	-4.175	0.01	-2.29	0.03		-5.41	0.2	-2.01	0.33	-1.89	0.2	-3.01	0.17	2.89	0.53		-4.75	0.26	-5.14	0.28	-1.92	0.58	-2.06	0.37	-1.72	0.33	-1.98	0.24	-3.26	0.32	-2.88	0.17	3.06	0.96	2.8	0.58		-2.83	0.63561	-3.08	0.464004
	bCD	cis-4-methylcyclohexanol[0]	b-m4c	-4.319	0.006	-2.27	0.01		-4.89	0.19	-1.16	0.31	-2.41	0.42	-2.98	0.23	4.23	0.76		-4.1	0.24	-4.68	0.24	-1.44	0.33	-1.06	0.4	-2.37	0.28	-2.43	0.57	-3.71	0.22	-2.69	0.27	4.64	0.59	4.06	1.01		-2.66	0.408044	-3.62	0.466476
	bCD	trans-4-methylcyclohexanol[0]	b-m4t	-4.541	0.008	-2.17	0.02		-5.84	0.2	-1.87	0.35	-1.91	0.32	-2.76	0.2	2.8	0.65		-4.87	0.24	-5.69	0.24	-1.02	0.38	-2.1	0.4	-2.48	0.23	-1.75	0.39	-2.83	0.22	-2.74	0.25	4.29	0.59	2.4	0.77		-3.85	0.449444	-3.59	0.466476
	bCD	cycloheptanol[0]	b-chp	-4.56	0.011	-2.96	0.01		-5.92	0.2	-2.38	0.25	-1.93	0.2	-3.69	0.18	3.25	0.54		-5.02	0.24	-5.75	0.24	-2.68	0.4	-2.29	0.29	-2.09	0.25	-1.88	0.25	-3.59	0.3	-3.73	0.21	3	0.74	3.33	0.65		-2.34	0.466476	-3.46	0.376431
	bCD	cyclooctanol[0]	b-coc	-4.971	0.036	-3.92	0.06		-6.21	0.19	-3.19	0.29	-1.75	0.24	-4.16	0.24	2.72	0.57		-5.34	0.25	-6.03	0.24	-3.13	0.35	-3.22	0.37	-1.72	0.29	-1.76	0.3	-4.05	0.23	-4.2	0.3	2.64	0.55	2.75	0.73		-2.21	0.430116	-2.81	0.441022
	aCD	butanoate[-1]	a-but	-1.506	0.036	-2.53	0.12		-4.54	0.24	-4.23	0.29	-0.3	0.25	-2.53	0.18	-1.39	0.5		-2.19	0.26	-4.53	0.24	-3.43	0.27	-4.24	0.29	-2.84	0.23	-0.24	0.25	-4.53	0.16	-2.49	0.18	3.94	0.43	-1.51	0.51		1.24	0.374833	-0.29	0.376431
	aCD	pentanoate[-1]	a-pnt	-2.596	0.005	-2.75	0.01		-4.81	0.22	-4.22	0.26	-0.6	0.21	-3.31	0.19	-0.31	0.48		-3.29	0.25	-4.75	0.24	-4.72	0.26	-4.17	0.28	-3.22	0.21	-0.35	0.17	-4.73	0.2	-3.18	0.18	3.23	0.41	-0.65	0.48		1.43	0.360694	-0.58	0.368782
	aCD	hexanoate[-1]	a-hex	-3.38	0.005	-3.4	0.02		-6.06	0.22	-5.47	0.31	-0.66	0.21	-3.74	0.22	-1.06	0.55		-4.63	0.24	-6	0.24	-5.16	0.3	-5.5	0.34	-2.55	0.31	-0.45	0.19	-4.87	0.17	-3.61	0.23	2.26	0.4	-1.44	0.57		0.53	0.384187	-0.5	0.416173
	aCD	trans-2-hexenoate[-1]	a-hx2	-3.344	0.01	-4.12	0.06		-5.46	0.2	-5.34	0.24	-1.06	0.32	-3.05	0.21	-1.23	0.45		-4.35	0.24	-5.35	0.24	-6	0.34	-5.21	0.27	-2	0.28	-0.87	0.37	-4.22	0.19	-2.82	0.2	0.22	0.52	-1.52	0.5		1.65	0.416173	-0.14	0.361248
	aCD	trans-3-hexenoate[-1]	a-hx3	-3.011	0.01	-3.36	0.05		-4.69	0.22	-4.43	0.22	0.14	0.21	-3.1	0.2	-1.47	0.37		-3.42	0.25	-4.61	0.25	-5.07	0.25	-4.34	0.24	0.2	0.25	0.13	0.24	-4.12	0.17	-2.95	0.21	-1.15	0.4	-1.52	0.42		1.65	0.353553	-0.27	0.346554
	aCD	heptanoate[-1]	a-hep	-3.991	0.013	-4.19	0.09		-6.61	0.23	-6.32	0.25	-0.28	0.22	-3.74	0.16	-2.3	0.54		-5.43	0.24	-6.51	0.27	-5.71	0.3	-6.44	0.29	-1.41	0.27	-0.07	0.22	-4.34	0.22	-3.63	0.17	0.04	0.56	-2.73	0.57		0.28	0.384187	-0.07	0.396232
	aCD	6-heptenoate[-1]	a-hp6	-3.597	0.004	-4.48	0.02		-5.9	0.23	-5.62	0.24	0.05	0.17	-4.19	0.22	-1.48	0.43		-4.06	0.24	-5.87	0.24	-5.58	0.26	-5.63	0.25	-2.87	0.29	0.21	0.15	-5.46	0.18	-4.12	0.23	2.76	0.46	-1.71	0.43		1.52	0.353836	-0.24	0.346554
	aCD	octanoate[-1]	a-oct	-4.622	0.017	-4.89	0.03		-7.6	0.25	-6.67	0.38	-0.14	0.16	-4.12	0.18	-2.4	0.49		-6.01	0.25	-7.55	0.27	-6.23	0.28	-6.7	0.41	-1.25	0.3	-0.05	0.16	-4.15	0.19	-4.12	0.19	-0.82	0.56	-2.54	0.53		0.22	0.375366	-0.85	0.490918
	bCD	pentanoate[-1]	b-pnt	-1.267	0.323	1.89	0.53		-3.04	0.22	0.29	0.34	-0.15	0.25	-0.79	0.23	1.23	0.58		-1.53	0.25	-2.99	0.24	1.3	0.32	0.19	0.36	-1.79	0.37	0.01	0.25	-1.53	0.26	-0.71	0.24	4.62	0.69	0.9	0.6		-2.83	0.406079	-3.18	0.432666
	bCD	hexanoate[-1]	b-hex	-2.28	0.03	1.31	0.04		-3.94	0.23	-0.52	0.27	0.01	0.26	-0.58	0.25	0.06	0.57		-2.33	0.24	-3.89	0.25	0.36	0.33	-0.59	0.28	-1.72	0.36	0.15	0.26	-1.03	0.26	-0.55	0.27	3.11	0.68	-0.2	0.59		-2.69	0.408044	-3.3	0.375366
	bCD	heptanoate[-1]	b-hep	-3.394	0.179	0.42	0.04		-4.83	0.22	-1.71	0.34	0.06	0.19	-0.02	0.2	-1.74	0.62		-3.56	0.24	-4.75	0.25	0	0.33	-1.97	0.35	-1.04	0.33	0.22	0.18	-0.83	0.27	0.1	0.21	1.87	0.73	-2.29	0.63		-3.56	0.408044	-2.78	0.430116
	bCD	benzoate[-1]	b-ben	-1.64	0.024	-2.51	0.08		-4.04	0.23	-2.59	0.39	-0.52	0.25	-2.65	0.22	0.58	0.61		-2.69	0.27	-3.96	0.25	-2.11	0.46	-2.66	0.44	-1.68	0.53	-0.37	0.25	-2.57	0.26	-2.66	0.25	2.14	0.99	0.37	0.66		-0.58	0.533385	-1.3	0.506063
	bCD	phenylacetate[-1]	b-pha	-1.697	0.048	-1.79	0.11		-3.69	0.23	-2.21	0.33	-0.63	0.24	-3.16	0.18	1.57	0.55		-2.43	0.25	-3.61	0.26	-2.79	0.48	-2.12	0.36	-0.12	0.73	-0.71	0.25	-3.59	0.24	-3.09	0.19	0.92	1.22	1.68	0.59		0.36	0.541202	-1.49	0.444072
	bCD	3-methylphenylacetate[-1]	b-mp3	-1.458	0.036	-2.75	0.13		-4.55	0.28	-2.78	0.34	-0.23	0.27	-3.14	0.28	0.59	0.65		-2.23	0.27	-4.54	0.29	-1.12	0.33	-2.82	0.35	-1.05	0.28	-0.21	0.28	-3.55	0.22	-3.13	0.28	3.49	0.56	0.51	0.66		-1.11	0.42638	-1.72	0.454533
	bCD	4-methylphenylacetate[-1]	b-mp4	-2.192	0.013	-2.89	0.05		-4.64	0.22	-1.98	0.25	0.1	0.23	-2.24	0.22	0.16	0.57		-3.21	0.25	-4.58	0.25	-2.71	0.37	-1.89	0.27	-0.49	0.37	0.17	0.25	-2.87	0.25	-2.17	0.24	0.65	0.61	0.11	0.63		-0.5	0.446542	-2.69	0.367967
	bCD	3-methoxyphenylacetate[-1]	b-mo3	-2.156	0.01	-2.93	0.03		-4.43	0.25	-3.39	0.28	0.26	0.31	-3.64	0.22	-0.01	0.65		-3.28	0.28	-4.32	0.29	-3.62	0.31	-3.35	0.32	-1.6	0.26	0.63	0.28	-3.96	0.25	-3.58	0.25	1.93	0.7	-0.4	0.71		0.34	0.417732	-0.97	0.431856
	bCD	4-methoxyphenylacetate[-1]	b-mo4	-2.512	0.007	-1.96	0.01		-5.19	0.22	-3.46	0.39	0.22	0.3	-2.42	0.24	-1.26	0.75		-4	0.26	-5.09	0.25	-4.1	0.34	-3.34	0.45	-0.57	0.31	0.37	0.34	-3.24	0.23	-2.27	0.26	-0.3	0.62	-1.43	0.87		0.1	0.428019	-1.75	0.514782
	bCD	3-phenylbutanoate[-1]	b-pb3	-3.518	0.007	-2.25	0.01		-4.61	0.22	-2.12	0.31	-5.55	0.41	-2.64	0.19	6.07	0.74		-3.92	0.27	-4.35	0.29	-1.99	0.39	-2.19	0.4	-7.15	0.26	-4.73	0.31	-3	0.23	-2.46	0.22	8.15	0.75	5	0.78		-1.93	0.474342	-2.16	0.494065
	bCD	4-phenylbutanoate[-1]	b-pb4	-3.599	0.018	-2.82	0.01		-5.51	0.2	-2.25	0.28	-0.76	0.3	-2.6	0.2	1.12	0.66		-4.77	0.27	-5.28	0.26	-2.23	0.29	-2.25	0.37	-1.57	0.29	-0.39	0.34	-2.75	0.17	-2.53	0.27	2.09	0.48	0.67	0.87		-2.54	0.396232	-3.03	0.452217
Column Heading Abbreviations
Host: aCD = αCD, bCD = βCD
GuestName: guest[charge]
HG-ID: host-guest ID abbreviation
dG: ΔG_binding, combined orientation
dH: ΔH_binding, combined orientation
Val: Valence energy; includes bonds, angles dihedrals,
and 1-4 terms
LJ: Lennard-Jones energy
Ele: Electrostatic energy
SEM: Standard Error of the Mean; each SEM column is
associated with the mean values immediately at left.
-p suffix: value for the primary orientation only
-s suffix: value for the secondary orientation only
-TdS-p: -TΔS; the entropic component of the binding free
energy for the primary orientation
-TdS-s: -TΔS; the entropic component of the binding free
energy for the secondary orientation

## Sheet: S8 Q4RG-OPC
Table S8. Complete experimental and calculated thermodynamic values (kcal/mol) for the Q4RG-OPC data set. (See below for explanation of the columns.)
				Experiment					Calculated											Calculated (Decomposed by Orientation)																					Entropic Contribution
	Host	GuestName	HG-ID	dG	SEM	dH	SEM		dG	SEM	dH	SEM	Val	SEM	LJ	SEM	Ele	SEM		dG-p	SEM	dG-s	SEM	dH-p	SEM	dH-s	SEM	Val-p	SEM	Val-s	SEM	LJ-p	SEM	LJ-s	SEM	Ele-p	SEM	Ele-s	SEM		-TdS-p	SEM	-TdS-s	SEM
	aCD	1-butylamine[+1]	a-bam	-1.575	0.019	-2.17	0.05		-1.04	0.19	-0.35	0.34	-4.54	0.36	-3.33	0.25	7.52	0.47		-0.88	0.24	-0.11	0.24	-0.87	0.32	1.43	0.24	-5.17	0.31	-2.41	0.22	-3.75	0.22	-1.88	0.2	8.05	0.51	5.72	0.38		-0.01	0.4	-1.54	0.339411
	aCD	n-methylbutylamine[+1]	a-nmb	-1.685	0.018	-2.57	0.06		-1.63	0.21	-1.23	0.32	-4.89	0.44	-4.02	0.23	7.68	0.53		-1.53	0.25	-0.42	0.24	-1.63	0.29	1.13	0.26	-5.27	0.46	-2.65	0.37	-4.34	0.2	-2.15	0.16	7.98	0.59	5.93	0.45		0.1	0.382884	-1.55	0.353836
	aCD	1-methylbutylamine[+1]	a-mba	-1.764	0.02	-2.68	0.07		-0.34	0.21	0.02	0.33	-3.51	0.38	-2.83	0.24	6.36	0.42		-0.22	0.25	0.75	0.25	-0.41	0.3	1.99	0.24	-3.91	0.39	-1.71	0.28	-3.11	0.23	-1.54	0.22	6.61	0.47	5.24	0.5		0.19	0.390512	-1.24	0.346554
	aCD	1-pentylamine[+1]	a-pam	-2.72	0.004	-3.28	0.02		-2.2	0.21	-1.87	0.35	-4.97	0.24	-4.3	0.23	7.4	0.38		-2.11	0.25	-0.97	0.24	-2.41	0.25	1.41	0.34	-5.32	0.19	-2.84	0.28	-4.66	0.16	-2.11	0.17	7.57	0.43	6.36	0.42		0.3	0.353553	-2.38	0.416173
	aCD	1-hexylamine[+1]	a-ham	-3.533	0.004	-4.19	0.02		-3.14	0.22	-2.39	0.32	-4.38	0.37	-4.84	0.23	6.83	0.45		-3.04	0.25	-1.91	0.25	-2.9	0.22	0.65	0.3	-4.57	0.42	-3.21	0.22	-5.19	0.16	-2.78	0.28	6.86	0.51	6.64	0.62		-0.14	0.333017	-2.56	0.390512
	aCD	n-methylhexylamine[+1]	a-nmh	-3.516	0.012	-4.2	0.08		-3.4	0.21	-1.93	0.35	-4.14	0.2	-4.93	0.25	7.15	0.39		-3.27	0.25	-2.34	0.25	-2.55	0.22	0.79	0.38	-4.42	0.18	-2.95	0.28	-5.34	0.2	-3.16	0.25	7.21	0.43	6.9	0.73		-0.72	0.333017	-3.13	0.454863
	aCD	1-methylhexylamine[+1]	a-mha	-3.604	0.004	-4.28	0.02		-3.28	0.23	-2.81	0.32	-4.77	0.27	-5.02	0.25	6.98	0.48		-3.22	0.25	-1.79	0.26	-3.22	0.25	1.06	0.3	-4.97	0.27	-2.84	0.2	-5.28	0.22	-2.56	0.2	7.03	0.52	6.46	0.48		0	0.353553	-2.85	0.396989
	aCD	1-heptylamine[+1]	a-hpa	-4.137	0.004	-4.66	0.02		-4.25	0.24	-2.36	0.29	-3.82	0.21	-5.01	0.21	6.47	0.42		-4.2	0.27	-2.72	0.24	-2.65	0.26	0.63	0.24	-3.95	0.21	-2.45	0.26	-5.19	0.2	-3.22	0.18	6.49	0.46	6.3	0.49		-1.55	0.374833	-3.35	0.339411
	aCD	1-methylheptylamine[+1]	a-mhp	-4.166	0.004	-4.74	0.02		-4.18	0.22	-2.73	0.46	-4.37	0.25	-5.02	0.23	6.66	0.47		-4.07	0.25	-3.02	0.26	-3.4	0.36	0.77	0.26	-4.71	0.21	-2.61	0.21	-5.36	0.17	-3.23	0.21	6.67	0.55	6.61	0.48		-0.67	0.438292	-3.79	0.367696
	aCD	1-octylamine[+1]	a-oam	-4.606	0.007	-5.46	0.03		-4.44	0.19	-1.66	0.35	-3.54	0.25	-4.54	0.25	6.43	0.32		-4.21	0.25	-3.7	0.25	-2.42	0.26	0.06	0.25	-3.92	0.28	-2.71	0.2	-4.99	0.22	-3.54	0.24	6.48	0.4	6.3	0.46		-1.79	0.360694	-3.76	0.353553
	bCD	1-hexylamine[+1]	b-ham	-2.486	0.084	0.6	0.05		-1.59	0.21	3.2	0.41	-2.95	0.25	-1.5	0.33	7.65	0.7		-1.49	0.24	-0.4	0.25	2.94	0.46	4.66	0.34	-3.23	0.23	-1.41	0.51	-1.58	0.38	-1.03	0.27	7.75	0.8	7.09	0.93		-4.43	0.518845	-5.06	0.422019
	bCD	1-methylhexylamine[+1]	b-mha	-2.557	0.066	0.47	0.03		-2.09	0.22	2.59	0.38	-3.08	0.37	-1.47	0.33	7.13	0.88		-2.03	0.24	-0.6	0.25	2.52	0.4	3.22	1.18	-3.29	0.38	-1.03	0.6	-1.55	0.35	-0.61	0.34	7.37	0.93	4.86	1.77		-4.55	0.466476	-3.82	1.20619
	bCD	1-octylamine[+1]	b-oam	-3.585	0.12	-0.48	0.03		-3.41	0.2	2.83	0.31	-2.07	0.26	-1.16	0.25	6.05	0.66		-3.3	0.24	-2.28	0.24	2.42	0.28	4.92	0.41	-2.15	0.3	-1.66	0.37	-1.31	0.28	-0.35	0.28	5.88	0.76	6.93	0.82		-5.72	0.368782	-7.2	0.475079
	aCD	cyclobutanol[0]	a-cbu	-2.022	0.016	-2.75	0.05		-2.25	0.2	-0.13	0.22	-2.5	0.22	-2.89	0.22	5.25	0.45		-1.24	0.24	-2.12	0.24	0.13	0.26	-0.2	0.27	-1.64	0.31	-2.71	0.23	-3.05	0.18	-2.85	0.27	4.82	0.42	5.35	0.54		-1.37	0.353836	-1.92	0.361248
	aCD	cyclopentanol[0]	a-cpe	-2.13	0.016	-2.74	0.02		-2.72	0.23	-0.51	0.35	-2.01	0.37	-2.98	0.17	4.48	0.6		-1.46	0.61	-2.59	0.24	-0.28	0.24	-0.56	0.4	-1.73	0.28	-2.07	0.43	-3.01	0.18	-2.98	0.2	4.47	0.5	4.48	0.7		-1.18	0.655515	-2.03	0.466476
	aCD	cycloheptanol[0]	a-chp	-2.51	0.06	-2.99	0.23		-2.84	0.25	-0.75	0.3	-1.37	0.27	-2.03	0.22	2.64	0.45		-0.04	0.28	-2.83	0.26	1.93	0.31	-0.78	0.3	1.72	0.29	-1.4	0.27	-1.05	0.34	-2.04	0.22	1.26	0.64	2.66	0.46		-1.97	0.417732	-2.05	0.396989
	aCD	cyclooctanol[0]	a-coc	-3.227	1.135	-0.93	0.32		-2.86	0.26	-0.49	0.31	-1.62	0.3	-2.3	0.16	3.44	0.39		-0.62	0.29	-2.84	0.26	2.18	0.33	-0.56	0.32	1.76	0.24	-1.72	0.3	-0.55	0.19	-2.35	0.16	0.97	0.45	3.51	0.4		-2.8	0.439318	-2.28	0.412311
	bCD	cyclobutanol[0]	b-cbu	-1.554	0.167	0.88	0.17		-1.98	0.18	2.38	0.26	-1.4	0.3	-1.1	0.23	4.88	0.59		-1.48	0.24	-1.61	0.25	2.13	0.3	2.59	0.37	-1.58	0.29	-1.25	0.46	-1.48	0.23	-0.79	0.32	5.19	0.63	4.63	0.89		-3.61	0.384187	-4.2	0.446542
	bCD	cyclopentanol[0]	b-cpe	-3.05	0.01	-1.09	0.01		-3.47	0.18	1.66	0.26	-1.61	0.21	-3.05	0.2	6.32	0.48		-2.79	0.24	-3.21	0.24	1.36	0.33	1.81	0.34	-1.68	0.22	-1.58	0.29	-3.22	0.29	-2.96	0.26	6.26	0.65	6.35	0.62		-4.15	0.408044	-5.02	0.416173
	bCD	1-methylcyclohexanol[0]	b-mch	-4.175	0.01	-2.29	0.03		-4.72	0.18	1.65	0.24	-1	0.19	-2.96	0.22	5.61	0.5		-4.26	0.25	-4.31	0.26	1.85	0.28	1.47	0.36	-0.86	0.26	-1.13	0.25	-3.25	0.3	-2.7	0.25	5.96	0.72	5.29	0.61		-6.11	0.375366	-5.78	0.444072
	bCD	cis-4-methylcyclohexanol[0]	b-m4c	-4.319	0.006	-2.27	0.01		-4.41	0.19	1.58	0.24	-1.53	0.22	-3.46	0.27	6.56	0.51		-3.58	0.25	-4.21	0.24	1.18	0.31	1.72	0.28	-2.27	0.28	-1.26	0.23	-3.97	0.28	-3.27	0.34	7.43	0.66	6.25	0.61		-4.76	0.398246	-5.93	0.368782
	bCD	trans-4-methylcyclohexanol[0]	b-m4t	-4.541	0.008	-2.17	0.02		-5.31	0.19	1.26	0.25	-1.79	0.24	-2.66	0.24	5.71	0.61		-4.41	0.25	-5.14	0.23	1.33	0.28	1.24	0.32	-1.87	0.4	-1.77	0.28	-2.57	0.3	-2.69	0.29	5.76	0.82	5.69	0.75		-5.74	0.375366	-6.38	0.394081
	bCD	cycloheptanol[0]	b-chp	-4.56	0.011	-2.96	0.01		-5.16	0.18	0.31	0.27	-1.86	0.28	-3.62	0.3	5.79	0.7		-4.45	0.24	-4.92	0.24	0.22	0.34	0.35	0.35	-2.28	0.52	-1.65	0.29	-3.67	0.36	-3.59	0.4	6.17	1.03	5.6	0.88		-4.67	0.416173	-5.27	0.424382
	bCD	cyclooctanol[0]	b-coc	-4.971	0.036	-3.92	0.06		-5.48	0.19	0.46	0.26	-2.06	0.31	-4.45	0.21	6.97	0.6		-4.99	0.26	-5.09	0.26	-0.06	0.33	0.89	0.28	-1.63	0.28	-2.43	0.46	-4.13	0.29	-4.72	0.22	5.7	0.67	8.04	0.68		-4.93	0.420119	-5.98	0.382099
	aCD	butanoate[-1]	a-but	-1.506	0.036	-2.53	0.12		-2.97	0.25	-1.05	0.21	-0.5	0.25	-2.75	0.23	2.2	0.48		-0.99	0.26	-2.95	0.26	-1.22	0.28	-1.05	0.22	-3.46	0.25	-0.37	0.24	-4.34	0.16	-2.68	0.23	6.58	0.4	2	0.48		0.23	0.382099	-1.9	0.340588
	aCD	pentanoate[-1]	a-pnt	-2.596	0.005	-2.75	0.01		-4.18	0.23	-0.62	0.24	-0.82	0.18	-2.95	0.19	3.16	0.41		-2.18	0.24	-4.15	0.24	-1.86	0.35	-0.57	0.24	-3.51	0.41	-0.71	0.17	-4.7	0.21	-2.88	0.19	6.35	0.51	3.02	0.42		-0.32	0.424382	-3.58	0.339411
	aCD	hexanoate[-1]	a-hex	-3.38	0.005	-3.4	0.02		-4.57	0.22	-1.31	0.26	-1.04	0.25	-3.51	0.23	3.25	0.46		-3.37	0.27	-4.47	0.26	-1.9	0.29	-1.2	0.29	-2.45	0.22	-0.79	0.25	-4.59	0.17	-3.32	0.24	5.14	0.41	2.91	0.49		-1.47	0.396232	-3.27	0.389487
	aCD	trans-2-hexenoate[-1]	a-hx2	-3.344	0.01	-4.12	0.06		-4.96	0.25	-1.53	0.21	-0.91	0.23	-2.99	0.21	2.37	0.41		-3.14	0.25	-4.93	0.26	-2.78	0.3	-1.45	0.22	-1.69	0.27	-0.86	0.24	-4.02	0.19	-2.93	0.22	2.93	0.42	2.34	0.43		-0.36	0.390512	-3.48	0.340588
	aCD	trans-3-hexenoate[-1]	a-hx3	-3.011	0.01	-3.36	0.05		-3.57	0.21	-1.57	0.26	-0.16	0.3	-2.75	0.2	1.34	0.44		-2.61	0.26	-3.41	0.26	-2.49	0.27	-1.31	0.28	0.17	0.43	-0.26	0.35	-3.68	0.22	-2.48	0.19	1.02	0.55	1.43	0.53		-0.12	0.374833	-2.1	0.382099
	aCD	heptanoate[-1]	a-hep	-3.991	0.013	-4.19	0.09		-5.47	0.21	-1.77	0.25	-0.42	0.17	-3.86	0.16	2.5	0.41		-4.44	0.25	-5.33	0.25	-1.57	0.24	-1.82	0.3	-1.12	0.24	-0.25	0.18	-4.09	0.2	-3.8	0.18	3.64	0.47	2.23	0.46		-2.87	0.346554	-3.51	0.390512
	aCD	6-heptenoate[-1]	a-hp6	-3.597	0.004	-4.48	0.02		-4.18	0.2	-2.15	0.24	-1.1	0.44	-3.82	0.18	2.77	0.57		-3.36	0.25	-3.98	0.25	-2.48	0.39	-2.02	0.28	-3.52	0.44	-0.17	0.24	-4.48	0.21	-3.57	0.18	5.52	0.54	1.72	0.46		-0.88	0.463249	-1.96	0.375366
	aCD	octanoate[-1]	a-oct	-4.622	0.017	-4.89	0.03		-5.95	0.22	-2.06	0.24	-0.71	0.17	-4.07	0.16	2.72	0.4		-4.99	0.25	-5.8	0.27	-1.73	0.23	-2.15	0.29	-0.8	0.2	-0.69	0.21	-3.85	0.19	-4.14	0.19	2.91	0.43	2.67	0.49		-3.26	0.339706	-3.65	0.396232
	bCD	pentanoate[-1]	b-pnt	-1.267	0.323	1.89	0.53		-2.08	0.22	3.61	0.32	0.41	0.27	-0.73	0.26	3.93	0.62		-0.58	0.24	-2.03	0.24	3.55	0.28	3.62	0.35	-1.18	0.28	0.57	0.29	-1.34	0.3	-0.66	0.28	6.07	0.65	3.72	0.67		-4.13	0.368782	-5.65	0.424382
	bCD	hexanoate[-1]	b-hex	-2.28	0.03	1.31	0.04		-3.19	0.23	3.57	0.29	-0.07	0.32	-0.71	0.24	4.35	0.7		-1.43	0.24	-3.16	0.24	3.64	0.3	3.57	0.31	-1.5	0.36	0.02	0.33	-0.74	0.19	-0.7	0.26	5.87	0.57	4.26	0.74		-5.07	0.384187	-6.73	0.392046
	bCD	heptanoate[-1]	b-hep	-3.394	0.179	0.42	0.04		-4.11	0.22	3.49	0.26	0.33	0.34	-0.3	0.22	3.46	0.7		-2.71	0.24	-4.04	0.25	3.32	0.39	3.51	0.29	-0.54	0.23	0.43	0.38	-0.56	0.27	-0.27	0.24	4.42	0.58	3.35	0.77		-6.03	0.45793	-7.55	0.382884
	bCD	benzoate[-1]	b-ben	-1.64	0.024	-2.51	0.08		-3.01	0.22	0.48	0.43	-0.65	0.24	-2.6	0.26	3.73	0.74		-1.33	0.28	-2.96	0.24	0.48	0.37	0.48	0.47	-1.28	0.37	-0.6	0.26	-2.15	0.27	-2.63	0.27	3.92	0.62	3.71	0.8		-1.81	0.464004	-3.44	0.527731
	bCD	phenylacetate[-1]	b-pha	-1.697	0.048	-1.79	0.11		-3.14	0.22	1.23	0.27	-1	0.43	-3.24	0.28	5.46	0.82		-1.75	0.27	-3.06	0.25	0.27	0.3	1.35	0.29	-0.3	0.61	-1.09	0.47	-2.35	0.25	-3.35	0.3	2.92	0.7	5.78	0.9		-2.02	0.403609	-4.41	0.382884
	bCD	3-methylphenylacetate[-1]	b-mp3	-1.458	0.036	-2.75	0.13		-3.31	0.22	1.25	0.31	-0.68	0.31	-2.89	0.28	4.82	0.69		-1.81	0.28	-3.25	0.24	0.26	1.01	1.35	0.31	-0.72	0.3	-0.68	0.34	-2.68	0.24	-2.91	0.31	3.66	1.11	4.94	0.74		-2.07	1.04809	-4.6	0.392046
	bCD	4-methylphenylacetate[-1]	b-mp4	-2.192	0.013	-2.89	0.05		-3.96	0.21	2.35	0.39	-0.09	0.32	-2.07	0.29	4.51	0.84		-2.79	0.24	-3.86	0.24	0.57	0.3	2.68	0.41	-1.06	0.26	0.09	0.36	-2.57	0.27	-1.97	0.34	4.2	0.59	4.56	0.99		-3.36	0.384187	-6.54	0.475079
	bCD	3-methoxyphenylacetate[-1]	b-mo3	-2.156	0.01	-2.93	0.03		-3.67	0.21	-0.19	0.26	-0.07	0.38	-2.55	0.22	2.44	0.62		-2.89	0.3	-3.45	0.26	-0.84	0.33	0.09	0.29	-0.93	0.44	0.28	0.44	-2.67	0.22	-2.5	0.29	2.75	0.78	2.31	0.79		-2.05	0.445982	-3.54	0.389487
	bCD	4-methoxyphenylacetate[-1]	b-mo4	-2.512	0.007	-1.96	0.01		-3.8	0.21	0.52	0.35	0.23	0.3	-1.84	0.26	2.13	0.55		-2.68	0.25	-3.69	0.25	0.16	0.29	0.6	0.42	-1.03	0.43	0.48	0.32	-2.48	0.27	-1.71	0.29	3.67	0.86	1.82	0.61		-2.84	0.382884	-4.29	0.488774
	bCD	3-phenylbutanoate[-1]	b-pb3	-3.518	0.007	-2.25	0.01		-3.85	0.25	2.21	0.31	-4.94	0.34	-2.46	0.22	9.61	0.58		-2.56	0.27	-3.77	0.28	1.82	0.34	2.27	0.35	-7.16	0.38	-4.61	0.32	-2.07	0.24	-2.52	0.25	11.05	0.71	9.39	0.63		-4.38	0.434166	-6.04	0.448219
	bCD	4-phenylbutanoate[-1]	b-pb4	-3.599	0.018	-2.82	0.01		-4.78	0.23	1.39	0.29	-0.48	0.36	-2.01	0.29	3.89	0.61		-3.38	0.27	-4.71	0.25	1.28	0.47	1.4	0.32	-1.55	0.44	-0.35	0.39	-2.27	0.51	-1.98	0.31	5.1	1.32	3.74	0.65		-4.66	0.542033	-6.11	0.406079
Column Heading Abbreviations
Host: aCD = αCD, bCD = βCD
GuestName: guest[charge]
HG-ID: host-guest ID abbreviation
dG: ΔG_binding, combined orientation
dH: ΔH_binding, combined orientation
Val: Valence energy; includes bonds, angles dihedrals,
and 1-4 terms
LJ: Lennard-Jones energy
Ele: Electrostatic energy
SEM: Standard Error of the Mean; each SEM column is
associated with the mean values immediately at left.
-p suffix: value for the primary orientation only
-s suffix: value for the secondary orientation only
-TdS-p: -TΔS; the entropic component of the binding free
energy for the primary orientation
-TdS-s: -TΔS; the entropic component of the binding free
energy for the secondary orientation

## Sheet: S9 Q4RG-OPC-jc
Table S9. Complete experimental and calculated thermodynamic values (kcal/mol) for the Q4RG-OPC-jc data set. (See below for explanation of the columns.)
				Experiment					Calculated											Calculated (Decomposed by Orientation)																					Entropic Contribution
	Host	GuestName	HG-ID	dG	SEM	dH	SEM		dG	SEM	dH	SEM	Val	SEM	LJ	SEM	Ele	SEM		dG-p	SEM	dG-s	SEM	dH-p	SEM	dH-s	SEM	Val-p	SEM	Val-s	SEM	LJ-p	SEM	LJ-s	SEM	Ele-p	SEM	Ele-s	SEM		-TdS-p	SEM	-TdS-s	SEM
	aCD	1-butylamine[+1]	a-bam	-1.575	0.019	-2.17	0.05		-0.81	0.22	-0.48	0.32	-4.22	0.3	-3.32	0.25	7.06	0.53		-0.7	0.25	0.34	0.23	-0.86	0.31	1.47	0.25	-4.53	0.3	-2.62	0.31	-3.54	0.26	-2.16	0.22	7.21	0.61	6.25	0.59		0.16	0.398246	-1.13	0.339706
	aCD	n-methylbutylamine[+1]	a-nmb	-1.685	0.018	-2.57	0.06		-0.86	0.22	-1.41	0.32	-5.09	0.28	-4.11	0.23	7.8	0.43		-0.79	0.25	0.58	0.25	-1.75	0.28	1.68	0.28	-5.42	0.24	-2.2	0.3	-4.36	0.21	-1.89	0.17	8.03	0.45	5.77	0.61		0.96	0.375366	-1.1	0.375366
	aCD	1-methylbutylamine[+1]	a-mba	-1.764	0.02	-2.68	0.07		-0.24	0.19	0.24	0.38	-3.5	0.31	-2.72	0.25	6.46	0.41		0.01	0.25	0.45	0.25	-0.61	0.26	1.93	0.27	-4.07	0.27	-2.37	0.39	-3.25	0.19	-1.66	0.21	6.71	0.47	5.97	0.65		0.62	0.360694	-1.48	0.367967
	aCD	1-pentylamine[+1]	a-pam	-2.72	0.004	-3.28	0.02		-2.03	0.25	-1.77	0.28	-4.75	0.29	-4.37	0.2	7.36	0.43		-1.99	0.26	-0.32	0.27	-1.98	0.26	1.33	0.26	-4.9	0.3	-2.73	0.24	-4.53	0.18	-2.1	0.19	7.45	0.46	6.15	0.4		-0.01	0.367696	-1.65	0.374833
	aCD	1-hexylamine[+1]	a-ham	-3.533	0.004	-4.19	0.02		-3.5	0.23	-2.4	0.32	-4.43	0.17	-5.14	0.24	7.18	0.57		-3.48	0.24	-1.39	0.24	-2.5	0.32	0.66	0.22	-4.48	0.17	-3.02	0.18	-5.22	0.25	-2.74	0.22	7.2	0.59	6.42	0.39		-0.98	0.4	-2.05	0.325576
	aCD	n-methylhexylamine[+1]	a-nmh	-3.516	0.012	-4.2	0.08		-3.57	0.21	-2.37	0.35	-4.34	0.22	-4.83	0.25	6.79	0.39		-3.48	0.24	-2.32	0.25	-2.82	0.31	0.45	0.3	-4.57	0.21	-2.91	0.25	-5.18	0.2	-2.63	0.18	6.92	0.43	5.99	0.46		-0.66	0.392046	-2.77	0.390512
	aCD	1-methylhexylamine[+1]	a-mha	-3.604	0.004	-4.28	0.02		-3.66	0.23	-2.92	0.28	-4.6	0.25	-5.18	0.2	6.87	0.43		-3.62	0.24	-1.83	0.25	-3.13	0.26	0.94	0.28	-4.71	0.26	-2.69	0.23	-5.33	0.19	-2.7	0.17	6.9	0.45	6.32	0.47		-0.49	0.353836	-2.77	0.375366
	aCD	1-heptylamine[+1]	a-hpa	-4.137	0.004	-4.66	0.02		-4.2	0.22	-1.92	0.34	-3.83	0.18	-5.03	0.2	6.94	0.37		-4.11	0.25	-2.93	0.27	-2.34	0.29	0.71	0.23	-3.96	0.18	-3.02	0.23	-5.3	0.15	-3.31	0.23	6.92	0.42	7.05	0.39		-1.77	0.382884	-3.64	0.354683
	aCD	1-methylheptylamine[+1]	a-mhp	-4.166	0.004	-4.74	0.02		-4.37	0.26	-3.11	0.28	-4.47	0.24	-5.47	0.2	6.84	0.43		-4.34	0.27	-2.42	0.3	-3.3	0.26	0.77	0.35	-4.53	0.24	-3.17	0.33	-5.57	0.19	-3.49	0.21	6.81	0.45	7.43	0.58		-1.04	0.374833	-3.19	0.460977
	aCD	1-octylamine[+1]	a-oam	-4.606	0.007	-5.46	0.03		-4.78	0.22	-2.37	0.26	-3.58	0.17	-4.89	0.16	6.1	0.37		-4.73	0.24	-3.2	0.25	-2.6	0.24	0.18	0.23	-3.67	0.17	-2.53	0.25	-5.01	0.16	-3.57	0.17	6.08	0.4	6.28	0.45		-2.13	0.339411	-3.38	0.339706
	bCD	1-hexylamine[+1]	b-ham	-2.486	0.084	0.6	0.05		-1.7	0.22	2.62	0.35	-3.41	0.36	-1.63	0.21	7.66	0.68		-1.63	0.25	-0.28	0.25	2.44	0.37	4.18	0.47	-3.75	0.35	-0.55	0.46	-1.76	0.22	-0.54	0.27	7.94	0.73	5.26	1.08		-4.07	0.446542	-4.46	0.532353
	bCD	1-methylhexylamine[+1]	b-mha	-2.557	0.066	0.47	0.03		-1.64	0.22	2.8	0.29	-2.9	0.26	-1.42	0.22	7.12	0.52		-1.55	0.25	-0.38	0.26	2.54	0.28	4.48	0.48	-3.13	0.26	-1.4	0.3	-1.55	0.24	-0.64	0.24	7.22	0.58	6.51	0.78		-4.09	0.375366	-4.86	0.545894
	bCD	1-octylamine[+1]	b-oam	-3.585	0.12	-0.48	0.03		-3.02	0.22	2.82	0.39	-2.2	0.24	-1.28	0.21	6.3	0.51		-2.91	0.26	-1.87	0.26	2.41	0.39	4.92	0.35	-2.38	0.25	-1.3	0.25	-1.37	0.23	-0.84	0.24	6.16	0.59	7.06	0.6		-5.32	0.468722	-6.79	0.436005
	aCD	cyclobutanol[0]	a-cbu	-2.022	0.016	-2.75	0.05		-2.71	0.21	-0.09	0.23	-2.4	0.21	-3.15	0.2	5.46	0.37		-1.32	0.25	-2.64	0.24	0.22	0.28	-0.13	0.25	-1.34	0.28	-2.53	0.22	-3.36	0.26	-3.12	0.22	4.92	0.49	5.52	0.41		-1.54	0.375366	-2.51	0.346554
	aCD	cyclopentanol[0]	a-cpe	-2.13	0.016	-2.74	0.02		-3.02	0.21	-0.57	0.2	-2.1	0.25	-3.02	0.15	4.56	0.36		-2.54	0.34	-2.61	0.24	-0.71	0.29	-0.45	0.24	-2.1	0.4	-2.1	0.26	-3.02	0.19	-3.03	0.2	4.41	0.55	4.69	0.41		-1.83	0.446878	-2.16	0.339411
	aCD	cycloheptanol[0]	a-chp	-2.51	0.06	-2.99	0.23		-2.68	0.25	-1.23	0.28	-1.89	0.27	-2.08	0.18	2.74	0.46		0.28	0.25	-2.67	0.25	1.58	0.28	-1.25	0.28	1.48	0.22	-1.91	0.28	-0.97	0.25	-2.09	0.18	1.08	0.57	2.75	0.47		-1.3	0.375366	-1.42	0.375366
	aCD	cyclooctanol[0]	a-coc	-3.227	1.135	-0.93	0.32		-3.09	0.28	-0.98	0.26	-1.39	0.28	-1.78	0.23	2.18	0.62		-0.28	0.28	-3.09	0.28	1.76	0.35	-1.01	0.26	1.66	0.26	-1.42	0.28	-0.49	0.18	-1.8	0.23	0.59	0.52	2.2	0.63		-2.04	0.448219	-2.08	0.382099
	bCD	cyclobutanol[0]	b-cbu	-1.554	0.167	0.88	0.17		-1.81	0.19	2.16	0.27	-1.28	0.22	-1.2	0.28	4.64	0.54		-1.17	0.25	-1.54	0.25	1.64	0.42	2.45	0.3	-1.19	0.22	-1.34	0.31	-1.69	0.37	-0.92	0.33	4.53	0.82	4.7	0.67		-2.81	0.488774	-3.99	0.390512
	bCD	cyclopentanol[0]	b-cpe	-3.05	0.01	-1.09	0.01		-3.56	0.18	1.06	0.3	-2.09	0.2	-3.27	0.24	6.42	0.62		-3.12	0.26	-3.12	0.25	1.32	0.47	0.8	0.3	-2.09	0.24	-2.08	0.29	-3.67	0.32	-2.87	0.26	7.09	0.87	5.76	0.74		-4.44	0.537122	-3.92	0.390512
	bCD	1-methylcyclohexanol[0]	b-mch	-4.175	0.01	-2.29	0.03		-5.15	0.24	0.89	0.33	-2.25	0.28	-3.43	0.27	6.57	0.7		-4.22	0.27	-4.98	0.29	0.54	0.31	1	0.41	-1.7	0.36	-2.43	0.32	-3.93	0.26	-3.27	0.32	6.17	0.66	6.69	0.88		-4.76	0.411096	-5.98	0.502195
	bCD	cis-4-methylcyclohexanol[0]	b-m4c	-4.319	0.006	-2.27	0.01		-4.52	0.19	1.73	0.22	-2.13	0.46	-3.51	0.21	7.37	0.61		-3.92	0.26	-4.21	0.26	1.96	0.28	1.59	0.28	-3.61	0.33	-1.2	0.46	-3.71	0.27	-3.38	0.28	9.27	0.67	6.17	0.55		-5.88	0.382099	-5.8	0.382099
	bCD	trans-4-methylcyclohexanol[0]	b-m4t	-4.541	0.008	-2.17	0.02		-5.31	0.2	1.27	0.28	-2.07	0.38	-3.04	0.2	6.38	0.57		-4.53	0.25	-5.1	0.26	1.44	0.4	1.2	0.35	-1.8	0.26	-2.18	0.5	-2.85	0.27	-3.12	0.25	6.08	0.72	6.51	0.72		-5.97	0.471699	-6.3	0.436005
	bCD	cycloheptanol[0]	b-chp	-4.56	0.011	-2.96	0.01		-4.96	0.19	0.58	0.23	-1.78	0.27	-3.81	0.22	6.16	0.6		-4.28	0.26	-4.69	0.25	0.67	0.27	0.53	0.31	-2.09	0.5	-1.61	0.28	-4.14	0.24	-3.63	0.28	6.89	0.79	5.78	0.76		-4.95	0.374833	-5.22	0.398246
	bCD	cyclooctanol[0]	b-coc	-4.971	0.036	-3.92	0.06		-5.52	0.19	-0.27	0.25	-1.67	0.24	-4.17	0.17	5.57	0.52		-5.06	0.27	-5.1	0.26	-0.25	0.38	-0.28	0.3	-1.82	0.36	-1.53	0.29	-4.27	0.22	-4.07	0.25	5.84	0.69	5.31	0.71		-4.81	0.466154	-4.82	0.396989
	aCD	butanoate[-1]	a-but	-1.506	0.036	-2.53	0.12		-3.44	0.25	-0.9	0.29	-0.45	0.31	-3.17	0.26	2.72	0.66		-1.84	0.26	-3.39	0.27	-1.61	0.32	-0.84	0.31	-3.51	0.35	-0.19	0.29	-4.25	0.21	-3.08	0.27	6.15	0.53	2.43	0.69		-0.23	0.412311	-2.55	0.411096
	aCD	pentanoate[-1]	a-pnt	-2.596	0.005	-2.75	0.01		-3.89	0.22	-0.61	0.26	-0.96	0.27	-3.49	0.22	3.84	0.42		-2.34	0.24	-3.84	0.24	-1.99	0.25	-0.49	0.27	-3.42	0.44	-0.74	0.26	-4.54	0.22	-3.4	0.24	5.98	0.73	3.65	0.44		-0.35	0.346554	-3.35	0.361248
	aCD	hexanoate[-1]	a-hex	-3.38	0.005	-3.4	0.02		-4.89	0.21	-1.94	0.21	-1	0.29	-3.6	0.2	2.66	0.52		-4.01	0.25	-4.71	0.26	-2.27	0.25	-1.83	0.26	-2.49	0.24	-0.5	0.25	-4.51	0.2	-3.29	0.18	4.73	0.5	1.96	0.53		-1.74	0.353553	-2.88	0.367696
	aCD	trans-2-hexenoate[-1]	a-hx2	-3.344	0.01	-4.12	0.06		-4.56	0.21	-2.12	0.24	-1.34	0.19	-3.23	0.21	2.45	0.43		-3.66	0.25	-4.39	0.26	-2.96	0.32	-1.85	0.25	-1.76	0.28	-1.21	0.21	-4.14	0.16	-2.93	0.21	2.94	0.49	2.29	0.53		-0.7	0.406079	-2.54	0.360694
	aCD	trans-3-hexenoate[-1]	a-hx3	-3.011	0.01	-3.36	0.05		-4.14	0.2	-1.78	0.23	-0.42	0.21	-2.96	0.21	1.6	0.39		-3.12	0.25	-4	0.24	-2.31	0.3	-1.65	0.26	0.18	0.42	-0.57	0.22	-3.9	0.22	-2.72	0.21	1.41	0.56	1.65	0.45		-0.81	0.390512	-2.35	0.353836
	aCD	heptanoate[-1]	a-hep	-3.991	0.013	-4.19	0.09		-5.2	0.19	-1.9	0.23	-0.92	0.26	-3.98	0.17	3	0.49		-4.61	0.26	-4.89	0.26	-1.61	0.26	-2.08	0.3	-1.55	0.35	-0.52	0.27	-4.45	0.17	-3.68	0.18	4.39	0.49	2.11	0.5		-3	0.367696	-2.81	0.396989
	aCD	6-heptenoate[-1]	a-hp6	-3.597	0.004	-4.48	0.02		-4.49	0.22	-2.27	0.24	-0.63	0.28	-3.99	0.19	2.36	0.4		-3.13	0.24	-4.41	0.24	-3.04	0.41	-2.17	0.26	-3.35	0.26	-0.28	0.24	-4.95	0.27	-3.87	0.2	5.26	0.66	1.98	0.39		-0.09	0.475079	-2.24	0.353836
	aCD	octanoate[-1]	a-oct	-4.622	0.017	-4.89	0.03		-6.26	0.22	-2.26	0.24	-0.45	0.27	-3.96	0.15	2.15	0.45		-5.24	0.26	-6.13	0.27	-2.23	0.32	-2.27	0.28	-1.65	0.51	-0.15	0.25	-4.24	0.17	-3.89	0.18	3.66	0.62	1.77	0.48		-3.01	0.412311	-3.86	0.388973
	bCD	pentanoate[-1]	b-pnt	-1.267	0.323	1.89	0.53		-2.32	0.23	3.31	0.29	-0.35	0.41	-0.88	0.21	4.54	0.64		-0.9	0.25	-2.25	0.25	3.13	0.55	3.33	0.31	-1.32	0.26	-0.24	0.45	-1.39	0.29	-0.82	0.22	5.84	0.85	4.39	0.7		-4.03	0.604152	-5.58	0.398246
	bCD	hexanoate[-1]	b-hex	-2.28	0.03	1.31	0.04		-3.05	0.19	3.19	0.33	-0.07	0.24	-1.02	0.19	4.28	0.64		-2.27	0.27	-2.84	0.24	2.08	0.57	3.64	0.29	0.27	0.52	-0.21	0.24	-1.04	0.29	-1.01	0.23	2.85	1.26	4.87	0.62		-4.35	0.630714	-6.48	0.376431
	bCD	heptanoate[-1]	b-hep	-3.394	0.179	0.42	0.04		-3.97	0.25	3.36	0.31	0.05	0.29	-0.65	0.21	3.96	0.55		-2.09	0.25	-3.93	0.26	3.55	0.39	3.35	0.32	0.04	0.33	0.06	0.3	-0.79	0.33	-0.64	0.22	4.3	0.87	3.94	0.57		-5.64	0.463249	-7.28	0.412311
	bCD	benzoate[-1]	b-ben	-1.64	0.024	-2.51	0.08		-3.09	0.23	0.19	0.39	-0.49	0.24	-2.49	0.22	3.17	0.6		-1.41	0.26	-3.05	0.25	0.12	0.33	0.2	0.42	-1.8	0.31	-0.39	0.25	-2.21	0.22	-2.51	0.24	4.13	0.59	3.1	0.64		-1.53	0.420119	-3.25	0.488774
	bCD	phenylacetate[-1]	b-pha	-1.697	0.048	-1.79	0.11		-3.29	0.22	0.75	0.26	-0.69	0.34	-3.01	0.19	4.45	0.55		-2.19	0.27	-3.17	0.26	0.28	0.36	0.86	0.29	-0.74	0.82	-0.68	0.37	-2.96	0.32	-3.01	0.22	3.98	1.17	4.55	0.6		-2.47	0.45	-4.03	0.389487
	bCD	3-methylphenylacetate[-1]	b-mp3	-1.458	0.036	-2.75	0.13		-3.44	0.24	0.95	0.34	-0.02	0.39	-3.02	0.31	3.99	0.85		-2.04	0.31	-3.37	0.27	0.02	0.82	1.07	0.35	-0.66	0.42	0.06	0.42	-2.93	0.29	-3.03	0.35	3.62	1.41	4.04	0.93		-2.06	0.876641	-4.44	0.442041
	bCD	4-methylphenylacetate[-1]	b-mp4	-2.192	0.013	-2.89	0.05		-3.36	0.21	0.96	0.3	0.23	0.37	-1.83	0.29	2.56	0.79		-2.39	0.26	-3.22	0.25	0.56	0.37	1.07	0.35	-0.96	0.31	0.55	0.42	-2.68	0.28	-1.59	0.34	4.2	0.68	2.11	0.95		-2.95	0.452217	-4.29	0.430116
	bCD	3-methoxyphenylacetate[-1]	b-mo3	-2.156	0.01	-2.93	0.03		-3.69	0.25	-0.55	0.32	0.63	0.27	-2.6	0.23	1.41	0.61		-2.39	0.31	-3.6	0.28	-1.11	0.29	-0.47	0.36	-0.61	0.6	0.82	0.26	-2.64	0.25	-2.59	0.26	2.14	0.87	1.3	0.67		-1.28	0.4245	-3.13	0.45607
	bCD	4-methoxyphenylacetate[-1]	b-mo4	-2.512	0.007	-1.96	0.01		-4.13	0.21	0.12	0.3	0.38	0.28	-1.83	0.27	1.56	0.61		-2.93	0.26	-4.03	0.25	-0.66	0.4	0.25	0.33	-0.58	0.41	0.55	0.31	-2.41	0.24	-1.73	0.31	2.34	0.72	1.43	0.7		-2.27	0.477074	-4.28	0.414005
	bCD	3-phenylbutanoate[-1]	b-pb3	-3.518	0.007	-2.25	0.01		-3.54	0.26	1.64	0.23	-5.36	0.42	-2.31	0.22	9.31	0.58		-2.56	0.26	-3.38	0.32	1.32	0.35	1.72	0.27	-7.11	0.31	-4.87	0.42	-2.09	0.26	-2.37	0.26	10.53	0.56	8.96	0.68		-3.88	0.436005	-5.1	0.418688
	bCD	4-phenylbutanoate[-1]	b-pb4	-3.599	0.018	-2.82	0.01		-4.24	0.21	0.84	0.31	-0.31	0.31	-1.9	0.21	3.05	0.55		-3.34	0.29	-4.07	0.27	0.72	0.31	0.88	0.39	-0.73	0.79	-0.18	0.27	-2.29	0.33	-1.78	0.24	3.74	0.95	2.83	0.61		-4.06	0.4245	-4.95	0.474342
Column Heading Abbreviations
Host: aCD = αCD, bCD = βCD
GuestName: guest[charge]
HG-ID: host-guest ID abbreviation
dG: ΔG_binding, combined orientation
dH: ΔH_binding, combined orientation
Val: Valence energy; includes bonds, angles dihedrals,
and 1-4 terms
LJ: Lennard-Jones energy
Ele: Electrostatic energy
SEM: Standard Error of the Mean; each SEM column is
associated with the mean values immediately at left.
-p suffix: value for the primary orientation only
-s suffix: value for the secondary orientation only
-TdS-p: -TΔS; the entropic component of the binding free
energy for the primary orientation
-TdS-s: -TΔS; the entropic component of the binding free
energy for the secondary orientation

## Sheet: S10 Q4RG-OPC-phos
Table S10. Complete experimental and calculated thermodynamic values (kcal/mol) for the Q4RG-OPC-phos data set. (See below for explanation of the columns.)
				Experiment					Calculated											Calculated (Decomposed by Orientation)																					Entropic Contribution
	Host	GuestName	HG-ID	dG	SEM	dH	SEM		dG	SEM	dH	SEM	Val	SEM	LJ	SEM	Ele	SEM		dG-p	SEM	dG-s	SEM	dH-p	SEM	dH-s	SEM	Val-p	SEM	Val-s	SEM	LJ-p	SEM	LJ-s	SEM	Ele-p	SEM	Ele-s	SEM		-TdS-p	SEM	-TdS-s	SEM
	aCD	1-butylamine[+1]	a-bam	-1.575	0.019	-2.17	0.05		-0.09	0.22	2.33	0.43	-2.82	0.3	-1.42	0.37	6.57	0.45		0.61	0.28	0.17	0.28	1.08	0.48	2.97	0.43	-3.92	0.37	-2.25	0.19	-2.58	0.26	-0.83	0.38	7.59	0.56	6.05	0.5		-0.47	0.555698	-2.8	0.513128
	aCD	n-methylbutylamine[+1]	a-nmb	-1.685	0.018	-2.57	0.06		-0.16	0.27	0.73	0.73	-3.82	0.66	-2.5	0.49	7.05	0.57		0.18	0.34	0.45	0.4	-0.74	0.36	2.87	0.41	-5.11	0.43	-1.92	0.24	-3.44	0.31	-1.13	0.31	7.82	0.6	5.92	0.58		0.92	0.495177	-2.42	0.5728
	aCD	1-methylbutylamine[+1]	a-mba	-1.764	0.02	-2.68	0.07		-0.51	0.26	1.57	0.46	-2.66	0.29	-1.64	0.33	5.87	0.53		-0.3	0.32	0.34	0.38	1.43	0.56	1.91	0.6	-3.02	0.26	-1.75	0.32	-2.03	0.31	-0.66	0.36	6.48	0.45	4.32	0.75		-1.73	0.644981	-1.57	0.710211
	aCD	1-pentylamine[+1]	a-pam	-2.72	0.004	-3.28	0.02		-1.89	0.23	0.68	0.48	-3.68	0.36	-2.84	0.42	7.2	0.5		-1.65	0.31	-1.14	0.27	-0.02	0.5	2.2	0.38	-4.37	0.26	-2.18	0.26	-3.64	0.29	-1.08	0.31	7.99	0.49	5.47	0.39		-1.63	0.588303	-3.34	0.466154
	aCD	1-hexylamine[+1]	a-ham	-3.533	0.004	-4.19	0.02		-2.7	0.28	-0.89	0.51	-3.92	0.23	-3.77	0.27	6.81	0.48		-2.61	0.32	-1.38	0.25	-1.22	0.53	1.39	0.49	-4.1	0.22	-2.7	0.23	-3.96	0.27	-2.48	0.3	6.84	0.55	6.58	0.41		-1.39	0.619112	-2.77	0.550091
	aCD	n-methylhexylamine[+1]	a-nmh	-3.516	0.012	-4.2	0.08		-3.17	0.28	-0.68	0.49	-3.82	0.27	-3.83	0.37	6.97	0.55		-3.1	0.31	-1.71	0.42	-1.08	0.42	2.43	0.44	-4.06	0.21	-1.95	0.28	-4.15	0.29	-1.26	0.48	7.13	0.59	5.65	0.63		-2.02	0.522015	-4.14	0.608276
	aCD	1-methylhexylamine[+1]	a-mha	-3.604	0.004	-4.28	0.02		-3.33	0.25	0.05	0.52	-3.51	0.24	-3.33	0.38	6.89	0.31		-3.15	0.32	-2.43	0.27	-0.73	0.43	2.38	0.46	-3.81	0.21	-2.6	0.28	-3.92	0.29	-1.53	0.29	7.01	0.37	6.52	0.41		-2.42	0.536004	-4.81	0.533385
	aCD	1-heptylamine[+1]	a-hpa	-4.137	0.004	-4.66	0.02		-3.96	0.23	-0.03	0.6	-2.96	0.25	-3.31	0.38	6.24	0.33		-3.56	0.33	-3.44	0.32	-1.27	0.48	1.47	0.55	-3.48	0.23	-2.35	0.22	-4.09	0.35	-2.37	0.31	6.29	0.44	6.19	0.44		-2.29	0.582495	-4.91	0.636318
	aCD	1-methylheptylamine[+1]	a-mhp	-4.166	0.004	-4.74	0.02		-2.95	0.3	0.87	0.55	-0.17	0.43	-0.15	0.46	1.18	0.73		-2.74	0.38	-2.07	0.36	0.04	0.28	3.05	0.57	-0.32	0.28	0.25	1.15	-0.33	0.23	0.32	1.31	0.69	0.38	2.48	1.92		-2.78	0.472017	-5.12	0.674166
	aCD	1-octylamine[+1]	a-oam	-4.606	0.007	-5.46	0.03		-4.45	0.26	-0.6	0.41	-3.35	0.28	-3.94	0.31	6.69	0.35		-4.31	0.31	-3.43	0.26	-0.99	0.43	0.89	0.42	-3.5	0.33	-2.78	0.24	-4.18	0.34	-3.03	0.26	6.68	0.42	6.7	0.44		-3.32	0.530094	-4.32	0.493964
	bCD	1-hexylamine[+1]	b-ham	-2.486	0.084	0.6	0.05		-1.39	0.23	2.95	0.39	-3.2	0.33	-0.98	0.4	7.12	0.76		-1.31	0.26	-0.02	0.26	2.73	0.41	4.59	0.34	-3.4	0.35	-1.68	0.32	-1.04	0.44	-0.46	0.38	7.18	0.85	6.72	0.76		-4.04	0.485489	-4.61	0.428019
	bCD	1-methylhexylamine[+1]	b-mha	-2.557	0.066	0.47	0.03		-1.48	0.24	3.4	0.58	-2.26	0.25	-0.99	0.37	6.64	0.53		-1.45	0.26	0.28	0.27	3.3	0.61	4.85	0.37	-2.36	0.26	-0.7	0.33	-1.03	0.39	-0.25	0.36	6.7	0.56	5.81	0.58		-4.75	0.663099	-4.57	0.458039
	bCD	1-octylamine[+1]	b-oam	-3.585	0.12	-0.48	0.03		-3.21	0.23	3.44	0.31	-2.39	0.27	-1.11	0.23	6.95	0.52		-3.12	0.27	-1.97	0.27	3.22	0.32	4.75	0.42	-2.56	0.29	-1.38	0.33	-1.26	0.24	-0.23	0.27	7.04	0.59	6.36	0.7		-6.34	0.418688	-6.72	0.4993
	aCD	cyclobutanol[0]	a-cbu	-2.022	0.016	-2.75	0.05		-0.97	0.24	0.91	0.29	-1.73	0.25	-2.31	0.28	4.96	0.47		-0.16	0.31	-0.76	0.3	1.03	0.46	0.87	0.35	-1.12	0.28	-1.98	0.27	-2.74	0.39	-2.14	0.33	4.88	0.68	4.99	0.57		-1.19	0.554707	-1.63	0.460977
	aCD	cyclopentanol[0]	a-cpe	-2.13	0.016	-2.74	0.02		-2.89	0.25	1.08	0.39	-1.55	0.28	-1.69	0.28	4.31	0.4		-1.12	0.48	-2.85	0.27	1.45	0.65	1.05	0.41	-0.91	0.38	-1.6	0.29	-1.32	0.37	-1.71	0.3	3.68	0.55	4.36	0.42		-2.57	0.808022	-3.9	0.490918
	aCD	cycloheptanol[0]	a-chp	-2.51	0.06	-2.99	0.23		-3.13	0.35	1.19	0.6	-1.23	0.26	-0.72	0.42	3.15	0.45		-0.13	0.38	-3.13	0.35	1.04	0.59	1.19	0.6	2.09	0.29	-1.26	0.26	-1.62	0.4	-0.72	0.43	0.57	0.47	3.17	0.46		-1.17	0.701783	-4.32	0.694622
	aCD	cyclooctanol[0]	a-coc	-3.227	1.135	-0.93	0.32		-3.52	0.26	1.34	0.32	-1.4	0.23	-0.97	0.26	3.71	0.42		0.48	0.39	-3.51	0.26	1.4	0.65	1.34	0.32	2.43	0.29	-1.41	0.23	-1.33	0.43	-0.97	0.26	0.29	0.47	3.72	0.42		-0.92	0.758024	-4.85	0.412311
	bCD	cyclobutanol[0]	b-cbu	-1.554	0.167	0.88	0.17		-1.42	0.19	2.53	0.28	-0.94	0.26	-0.87	0.24	4.34	0.49		-1.04	0.26	-0.91	0.28	2.16	0.36	2.97	0.34	-1.06	0.38	-0.79	0.29	-0.99	0.35	-0.72	0.28	4.21	0.74	4.49	0.54		-3.2	0.444072	-3.88	0.440454
	bCD	cyclopentanol[0]	b-cpe	-3.05	0.01	-1.09	0.01		-3.35	0.22	1.78	0.32	-1.73	0.23	-2.43	0.26	5.94	0.53		-2.52	0.25	-3.16	0.29	1.41	0.38	1.92	0.39	-1.97	0.25	-1.64	0.29	-2.99	0.24	-2.22	0.32	6.38	0.61	5.78	0.66		-3.93	0.454863	-5.08	0.486004
	bCD	1-methylcyclohexanol[0]	b-mch	-4.175	0.01	-2.29	0.03		-4.55	0.25	1.84	0.31	-1.76	0.3	-2.59	0.31	6.18	0.64		-3.25	0.29	-4.47	0.28	1.1	0.34	1.95	0.35	-1.96	0.35	-1.73	0.34	-3.29	0.41	-2.48	0.35	6.34	0.73	6.16	0.72		-4.35	0.446878	-6.42	0.448219
	bCD	cis-4-methylcyclohexanol[0]	b-m4c	-4.319	0.006	-2.27	0.01		-4.53	0.22	2.02	0.32	-1.52	0.27	-2.98	0.28	6.53	0.56		-3.36	0.26	-4.43	0.25	1.52	0.3	2.11	0.37	-2.15	0.3	-1.41	0.31	-3.31	0.25	-2.92	0.33	6.99	0.59	6.44	0.64		-4.88	0.396989	-6.54	0.446542
	bCD	trans-4-methylcyclohexanol[0]	b-m4t	-4.541	0.008	-2.17	0.02		-4.57	0.19	1.87	0.24	-1.96	0.33	-2.12	0.28	5.96	0.55		-3.81	0.25	-4.34	0.25	1.92	0.31	1.85	0.31	-2.61	0.62	-1.68	0.33	-2.52	0.38	-1.95	0.34	7.05	0.95	5.48	0.59		-5.73	0.398246	-6.19	0.398246
	bCD	cycloheptanol[0]	b-chp	-4.56	0.011	-2.96	0.01		-5.24	0.19	1.03	0.23	-1.97	0.26	-3.34	0.27	6.34	0.52		-4.8	0.26	-4.81	0.26	0.84	0.33	1.22	0.27	-1.95	0.39	-1.98	0.32	-3.06	0.35	-3.62	0.35	5.84	0.71	6.83	0.64		-5.64	0.420119	-6.03	0.374833
	bCD	cyclooctanol[0]	b-coc	-4.971	0.036	-3.92	0.06		-5.17	0.22	-0.06	0.31	-1.66	0.28	-3.56	0.27	5.16	0.56		-4.33	0.32	-4.96	0.28	0.1	0.42	-0.13	0.39	-1.56	0.29	-1.69	0.35	-3.89	0.31	-3.44	0.33	5.56	0.73	5	0.7		-4.43	0.528015	-4.83	0.480104
	aCD	butanoate[-1]	a-but	-1.506	0.036	-2.53	0.12		-3.26	0.26	0.34	0.34	-0.17	0.25	-1.98	0.29	2.49	0.47		-0.72	0.32	-3.25	0.26	0.8	0.4	0.33	0.35	-2.16	0.4	-0.13	0.25	-2.41	0.32	-1.97	0.29	5.37	0.5	2.44	0.47		-1.52	0.51225	-3.58	0.436005
	aCD	pentanoate[-1]	a-pnt	-2.596	0.005	-2.75	0.01		-3.89	0.27	0.4	0.54	-0.91	0.28	-2.21	0.31	3.52	0.57		-2.43	0.26	-3.82	0.3	0.1	0.49	0.43	0.59	-3.27	0.31	-0.64	0.25	-3.5	0.4	-2.06	0.32	6.88	0.51	3.13	0.57		-2.53	0.554707	-4.25	0.661891
	aCD	hexanoate[-1]	a-hex	-3.38	0.005	-3.4	0.02		-4.11	0.2	-0.37	0.32	-1	0.3	-2.72	0.24	3.35	0.42		-3.36	0.3	-3.89	0.24	-1	0.35	-0.09	0.38	-2.18	0.34	-0.48	0.24	-3.23	0.27	-2.5	0.29	4.41	0.52	2.88	0.47		-2.36	0.460977	-3.8	0.449444
	aCD	trans-2-hexenoate[-1]	a-hx2	-3.344	0.01	-4.12	0.06		-4.73	0.23	0.1	0.53	-0.4	0.26	-1.74	0.36	2.24	0.47		-3.24	0.28	-4.67	0.25	-1.44	0.48	0.26	0.57	-1.13	0.24	-0.33	0.29	-2.56	0.25	-1.66	0.39	2.26	0.53	2.24	0.52		-1.8	0.555698	-4.93	0.622415
	aCD	trans-3-hexenoate[-1]	a-hx3	-3.011	0.01	-3.36	0.05		-4.16	0.23	0.06	0.44	0.03	0.21	-1.29	0.35	1.32	0.39		-2.35	0.28	-4.13	0.24	-0.48	0.44	0.09	0.47	0.42	0.36	0.01	0.22	-2.5	0.26	-1.22	0.37	1.6	0.46	1.3	0.41		-1.87	0.521536	-4.22	0.527731
	aCD	heptanoate[-1]	a-hep	-3.991	0.013	-4.19	0.09		-5.36	0.26	-0.21	0.35	0.05	0.22	-2.93	0.25	2.67	0.43		-4.15	0.27	-5.26	0.3	-0.03	0.38	-0.25	0.4	-0.9	0.26	0.22	0.23	-2.86	0.35	-2.95	0.28	3.72	0.5	2.48	0.48		-4.12	0.466154	-5.01	0.5
	aCD	6-heptenoate[-1]	a-hp6	-3.597	0.004	-4.48	0.02		-4.33	0.29	0.08	0.43	-0.06	0.26	-2.84	0.26	2.97	0.46		-2.74	0.26	-4.27	0.32	-1.08	0.47	0.18	0.46	-2.6	0.3	0.17	0.22	-3.88	0.47	-2.74	0.27	5.4	0.49	2.75	0.47		-1.66	0.537122	-4.45	0.560357
	aCD	octanoate[-1]	a-oct	-4.622	0.017	-4.89	0.03		-6.17	0.27	-0.04	0.39	0.22	0.2	-2.5	0.32	2.24	0.44		-4.38	0.35	-6.13	0.29	-0.42	0.45	-0.02	0.42	-1.16	0.33	0.31	0.2	-2.97	0.33	-2.47	0.34	3.7	0.46	2.14	0.46		-3.96	0.570088	-6.11	0.510392
	bCD	pentanoate[-1]	b-pnt	-1.267	0.323	1.89	0.53		-1.43	0.23	4	0.32	-0.25	0.34	-0.64	0.27	4.89	0.73		0.26	0.25	-1.38	0.25	3.51	0.46	4.03	0.34	-0.96	0.28	-0.2	0.37	-1.04	0.31	-0.61	0.29	5.5	0.73	4.84	0.78		-3.25	0.523546	-5.41	0.422019
	bCD	hexanoate[-1]	b-hex	-2.28	0.03	1.31	0.04		-3.2	0.24	4.42	0.27	0.01	0.35	-0.61	0.39	5.02	0.8		-1.24	0.25	-3.17	0.25	4.29	0.34	4.42	0.28	-1.28	0.39	0.07	0.36	-0.85	0.48	-0.6	0.4	6.42	0.86	4.96	0.83		-5.53	0.422019	-7.59	0.375366
	bCD	heptanoate[-1]	b-hep	-3.394	0.179	0.42	0.04		-3.44	0.21	4.29	0.26	0.18	0.26	0.12	0.28	3.99	0.5		-2.35	0.26	-3.32	0.25	3.8	0.33	4.4	0.3	0.52	0.37	0.11	0.3	0.62	0.26	0.01	0.33	2.66	0.69	4.28	0.56		-6.15	0.420119	-7.72	0.390512
	bCD	benzoate[-1]	b-ben	-1.64	0.024	-2.51	0.08		-2.76	0.26	0.82	0.38	-0.66	0.32	-2.01	0.37	3.49	0.75		-0.87	0.26	-2.73	0.27	0.7	0.36	0.83	0.39	-1.25	0.29	-0.63	0.34	-1.58	0.3	-2.04	0.39	3.53	0.62	3.49	0.78		-1.57	0.444072	-3.56	0.474342
	bCD	phenylacetate[-1]	b-pha	-1.697	0.048	-1.79	0.11		-2.76	0.23	1.69	0.28	-0.59	0.32	-2.78	0.26	5.07	0.61		-1.52	0.28	-2.67	0.26	0.74	0.35	1.85	0.31	-0.88	0.48	-0.55	0.36	-2.46	0.41	-2.84	0.29	4.07	0.78	5.24	0.68		-2.26	0.448219	-4.52	0.404599
	bCD	3-methylphenylacetate[-1]	b-mp3	-1.458	0.036	-2.75	0.13		-2.92	0.24	1.99	0.28	-0.04	0.4	-2.11	0.29	4.15	0.6		-1.06	0.3	-2.89	0.26	0.83	0.78	2.06	0.29	-0.08	0.4	-0.04	0.42	-2.39	0.38	-2.09	0.3	3.3	0.98	4.19	0.63		-1.89	0.835703	-4.95	0.389487
	bCD	4-methylphenylacetate[-1]	b-mp4	-2.192	0.013	-2.89	0.05		-3.49	0.22	2.17	0.28	0.21	0.33	-1.97	0.24	3.93	0.49		-2.22	0.27	-3.4	0.25	0.94	0.32	2.37	0.29	-0.43	0.42	0.31	0.36	-1.91	0.37	-1.98	0.26	3.28	0.84	4.03	0.54		-3.16	0.418688	-5.77	0.382884
	bCD	3-methoxyphenylacetate[-1]	b-mo3	-2.156	0.01	-2.93	0.03		-3.63	0.27	0.63	0.48	0.18	0.27	-2.58	0.28	3.03	0.5		-2.3	0.3	-3.55	0.31	0.11	0.31	0.71	0.54	-0.21	0.48	0.23	0.3	-1.98	0.28	-2.66	0.31	2.3	0.75	3.14	0.55		-2.41	0.431393	-4.26	0.622656
	bCD	4-methoxyphenylacetate[-1]	b-mo4	-2.512	0.007	-1.96	0.01		-3.78	0.23	1.36	0.46	0.09	0.27	-1.65	0.33	2.93	0.6		-2.26	0.27	-3.73	0.25	-0.15	0.39	1.51	0.5	-0.7	0.62	0.17	0.28	-2.33	0.32	-1.59	0.35	2.88	0.69	2.93	0.65		-2.11	0.474342	-5.24	0.559017
	bCD	3-phenylbutanoate[-1]	b-pb3	-3.518	0.007	-2.25	0.01		-3.78	0.31	2.75	0.3	-4.97	0.36	-1.7	0.25	9.42	0.62		-2.23	0.27	-3.72	0.34	2.11	0.35	2.81	0.32	-6.92	0.48	-4.78	0.36	-2.02	0.39	-1.67	0.27	11.05	0.8	9.26	0.66		-4.34	0.442041	-6.53	0.466905
	bCD	4-phenylbutanoate[-1]	b-pb4	-3.599	0.018	-2.82	0.01		-4.13	0.21	1.58	0.27	-0.76	0.31	-1.49	0.25	3.83	0.42		-3.64	0.3	-3.72	0.29	1.07	0.33	2.02	0.28	-1.45	0.33	-0.16	0.29	-1.35	0.33	-1.62	0.34	3.87	0.47	3.79	0.63		-4.71	0.445982	-5.74	0.403113
Column Heading Abbreviations
Host: aCD = αCD, bCD = βCD
GuestName: guest[charge]
HG-ID: host-guest ID abbreviation
dG: ΔG_binding, combined orientation
dH: ΔH_binding, combined orientation
Val: Valence energy; includes bonds, angles dihedrals,
and 1-4 terms
LJ: Lennard-Jones energy
Ele: Electrostatic energy
SEM: Standard Error of the Mean; each SEM column is
associated with the mean values immediately at left.
-p suffix: value for the primary orientation only
-s suffix: value for the secondary orientation only
-TdS-p: -TΔS; the entropic component of the binding free
energy for the primary orientation
-TdS-s: -TΔS; the entropic component of the binding free
energy for the secondary orientation

[truncated: 6 more sheets: S11 Q4RG-OPC-jcphos, S12 Q4BG-TIP3P, S13 BGRG-TIP3P, S14 BGBG-TIP3P, S15 ValDecmp, S16 SysDecmp]
